# Supplementary material for: Quantum mechanics/molecular mechanics methods can be more accurate than full quantum mechanics in systems involving dispersion correlations
Source: Royal Society of Chemistry journal article supplement (doi:10.1039/c0cp02957b), 2011-01-01
Supplement: c0cp02957b.pdf [file c0cp02957b.pdf]

## Supporting Information

### Quantum Mechanics/Molecular Mechanics methods can be more accurate than full Quantum Mechanics in systems involving dispersion correlations

W. M. C. Sameera<sup>a</sup> and Feliu Maseras<sup>a,b\*</sup>

<sup>a</sup>Institute of Chemical Research of Catalonia (ICIQ), Av., Països Catalans 16, 43007, Tarragona, Catalonia, Spain.

<sup>b</sup>Departament de Química, Universitat Autònoma de Barcelona, Catalonia, Spain.  
E-mail: fmaseras@iciq.es, Fax: 34-977-920229, Tel: 34-977-920202

#### Cartesian coordinates (Å) of the optimised structures

##### B3LYP/TZVP:UFF

|   |          |         |          |
|---|----------|---------|----------|
| S | 1.69318  | 8.75923 | 8.66126  |
| S | 1.26318  | 5.57923 | 6.29126  |
| O | -3.22682 | 6.08923 | 11.62126 |
| O | -3.26682 | 4.30923 | 10.17126 |
| C | -2.56682 | 5.54923 | 10.46126 |
| C | -2.80682 | 6.51923 | 9.28126  |
| H | -3.89682 | 6.61923 | 9.26126  |
| C | -2.25682 | 7.91923 | 9.54126  |
| H | -2.70682 | 8.60923 | 8.79126  |
| H | -2.57682 | 8.28923 | 10.53126 |
| C | -0.74682 | 8.00923 | 9.46126  |
| C | -0.10682 | 8.83923 | 8.56126  |
| H | -0.62682 | 9.46923 | 7.85126  |
| C | 1.45318  | 7.56923 | 9.98126  |
| H | 2.28318  | 7.09923 | 10.50126 |
| C | 0.12318  | 7.29923 | 10.26126 |
| C | -0.28682 | 6.31923 | 11.33126 |
| H | -0.84682 | 6.86923 | 12.12126 |
| H | 0.62318  | 5.89923 | 11.83126 |
| C | -1.12682 | 5.13923 | 10.81126 |
| H | -1.25682 | 4.46923 | 11.66126 |
| C | -0.41682 | 4.27923 | 9.73126  |
| H | 0.50318  | 3.87923 | 10.17126 |
| H | -1.06682 | 3.40923 | 9.56126  |
| C | -0.07682 | 4.88923 | 8.40126  |
| C | 1.16318  | 4.78923 | 7.84126  |
| H | 2.03318  | 4.29923 | 8.25126  |
| C | -0.39682 | 6.06923 | 6.41126  |
| H | -0.84682 | 6.65923 | 5.62126  |
| C | -0.98682 | 5.63923 | 7.57126  |
| C | -2.43682 | 5.92923 | 7.89126  |
| H | -3.00682 | 4.99923 | 7.79126  |

|   |          |         |          |
|---|----------|---------|----------|
| H | -2.82682 | 6.59923 | 7.13126  |
| C | -4.03682 | 5.06923 | 12.19126 |
| H | -4.86682 | 5.54923 | 12.71126 |
| H | -3.46682 | 4.46923 | 12.91126 |
| C | -4.43682 | 4.24923 | 10.98126 |
| H | -4.65682 | 3.20923 | 11.20126 |
| H | -5.29682 | 4.69923 | 10.46126 |

**B3LYP/def2-TZVP:UFF**

|   |          |         |          |
|---|----------|---------|----------|
| S | 1.66330  | 8.84020 | 8.71160  |
| S | 1.21800  | 5.65260 | 6.35430  |
| O | -3.26280 | 6.16820 | 11.66100 |
| O | -3.30800 | 4.40020 | 10.21420 |
| C | -2.60660 | 5.62880 | 10.50620 |
| C | -2.83610 | 6.59790 | 9.32930  |
| H | -3.92570 | 6.70560 | 9.30680  |
| C | -2.28480 | 8.00500 | 9.58980  |
| H | -2.73440 | 8.69780 | 8.84450  |
| H | -2.61390 | 8.36950 | 10.58620 |
| C | -0.78270 | 8.09550 | 9.51810  |
| C | -0.13280 | 8.91920 | 8.61680  |
| H | -0.65150 | 9.54870 | 7.90580  |
| C | 1.42000  | 7.64480 | 10.03570 |
| H | 2.24470  | 7.17200 | 10.55240 |
| C | 0.09250  | 7.37690 | 10.31790 |
| C | -0.32340 | 6.39580 | 11.38290 |
| H | -0.88260 | 6.94440 | 12.17090 |
| H | 0.58170  | 5.98110 | 11.87940 |
| C | -1.16100 | 5.22360 | 10.85840 |
| H | -1.29320 | 4.54760 | 11.71030 |
| C | -0.44850 | 4.36160 | 9.78350  |
| H | 0.47350  | 3.96970 | 10.21870 |
| H | -1.09260 | 3.49300 | 9.61760  |
| C | -0.11430 | 4.97490 | 8.44790  |
| C | 1.12560  | 4.87260 | 7.87980  |
| H | 1.99230  | 4.37910 | 8.29040  |
| C | -0.42180 | 6.14570 | 6.46480  |
| H | -0.86690 | 6.73090 | 5.67580  |
| C | -1.02130 | 5.72130 | 7.61850  |
| C | -2.46390 | 6.01720 | 7.93940  |
| H | -3.03930 | 5.09240 | 7.83550  |
| H | -2.85030 | 6.69590 | 7.17580  |
| C | -4.06830 | 5.15270 | 12.24210 |
| H | -4.90370 | 5.63000 | 12.75350 |
| H | -3.49640 | 4.55770 | 12.96380 |
| C | -4.46880 | 4.32890 | 11.03250 |
| H | -4.67020 | 3.28090 | 11.25480 |
| H | -5.33650 | 4.76210 | 10.52170 |

**B3LYP/6-31G(d):UFF**

|   |          |         |          |
|---|----------|---------|----------|
| S | 1.67000  | 8.82940 | 8.69700  |
| S | 1.22860  | 5.65080 | 6.33920  |
| O | -3.26610 | 6.17260 | 11.66410 |

|   |          |         |          |
|---|----------|---------|----------|
| O | -3.29670 | 4.39900 | 10.21040 |
| C | -2.60480 | 5.63360 | 10.51070 |
| C | -2.83780 | 6.60550 | 9.33190  |
| H | -3.93010 | 6.71670 | 9.31540  |
| C | -2.27930 | 8.01200 | 9.58790  |
| H | -2.72840 | 8.70470 | 8.84220  |
| H | -2.60430 | 8.37880 | 10.58480 |
| C | -0.77700 | 8.09610 | 9.51200  |
| C | -0.12620 | 8.91300 | 8.60500  |
| H | -0.64420 | 9.54020 | 7.89150  |
| C | 1.42560  | 7.64220 | 10.02830 |
| H | 2.24990  | 7.16990 | 10.54630 |
| C | 0.09800  | 7.37950 | 10.31420 |
| C | -0.31810 | 6.40580 | 11.38560 |
| H | -0.87830 | 6.95910 | 12.16940 |
| H | 0.58660  | 5.99370 | 11.88480 |
| C | -1.15630 | 5.22970 | 10.86780 |
| H | -1.28970 | 4.55580 | 11.72480 |
| C | -0.44560 | 4.36020 | 9.79110  |
| H | 0.47690  | 3.96170 | 10.22710 |
| H | -1.10010 | 3.49490 | 9.62930  |
| C | -0.11070 | 4.97260 | 8.45020  |
| C | 1.13170  | 4.86900 | 7.88330  |
| H | 2.00210  | 4.37660 | 8.29500  |
| C | -0.42860 | 6.14520 | 6.45770  |
| H | -0.87590 | 6.72990 | 5.66550  |
| C | -1.02450 | 5.72030 | 7.61520  |
| C | -2.47100 | 6.01540 | 7.94000  |
| H | -3.04600 | 5.08530 | 7.85220  |
| H | -2.86590 | 6.68740 | 7.17040  |
| C | -4.06800 | 5.14860 | 12.23930 |
| H | -4.90690 | 5.61940 | 12.75850 |
| H | -3.49500 | 4.54420 | 12.95800 |
| C | -4.46640 | 4.32940 | 11.01880 |
| H | -4.67810 | 3.27830 | 11.23370 |
| H | -5.33270 | 4.77230 | 10.50620 |

**B3LYP/def2-TZVPP:UFF**

|   |          |         |          |
|---|----------|---------|----------|
| S | 1.66310  | 8.84050 | 8.71400  |
| S | 1.21910  | 5.65280 | 6.35540  |
| O | -3.26390 | 6.16890 | 11.65990 |
| O | -3.30980 | 4.40080 | 10.21320 |
| C | -2.60770 | 5.62920 | 10.50520 |
| C | -2.83660 | 6.59830 | 9.32820  |
| H | -3.92540 | 6.70590 | 9.30520  |
| C | -2.28570 | 8.00490 | 9.58880  |
| H | -2.73480 | 8.69740 | 8.84300  |
| H | -2.61570 | 8.36950 | 10.58500 |
| C | -0.78350 | 8.09540 | 9.51850  |
| C | -0.13300 | 8.91950 | 8.61800  |
| H | -0.65130 | 9.54950 | 7.90710  |
| C | 1.41890  | 7.64450 | 10.03740 |
| H | 2.24330  | 7.17140 | 10.55440 |

|   |          |         |          |
|---|----------|---------|----------|
| C | 0.09130  | 7.37650 | 10.31860 |
| C | -0.32510 | 6.39510 | 11.38300 |
| H | -0.88450 | 6.94350 | 12.17080 |
| H | 0.57970  | 5.98030 | 11.87990 |
| C | -1.16230 | 5.22360 | 10.85810 |
| H | -1.29490 | 4.54810 | 11.70930 |
| C | -0.44940 | 4.36130 | 9.78340  |
| H | 0.47140  | 3.96900 | 10.21850 |
| H | -1.09330 | 3.49370 | 9.61720  |
| C | -0.11450 | 4.97470 | 8.44800  |
| C | 1.12580  | 4.87240 | 7.88070  |
| H | 1.99140  | 4.37900 | 8.29150  |
| C | -0.42070 | 6.14610 | 6.46500  |
| H | -0.86520 | 6.73130 | 5.67660  |
| C | -1.02090 | 5.72140 | 7.61830  |
| C | -2.46370 | 6.01750 | 7.93840  |
| H | -3.03850 | 5.09340 | 7.83430  |
| H | -2.84950 | 6.69530 | 7.17500  |
| C | -4.06690 | 5.15240 | 12.24270 |
| H | -4.90090 | 5.62830 | 12.75570 |
| H | -3.49290 | 4.55860 | 12.96240 |
| C | -4.46880 | 4.32830 | 11.03380 |
| H | -4.66890 | 3.28100 | 11.25600 |
| H | -5.33700 | 4.76060 | 10.52500 |

**B3LYP/QZVP:UFF**

|   |          |         |          |
|---|----------|---------|----------|
| S | 1.68420  | 8.82820 | 8.70190  |
| S | 1.29340  | 5.67630 | 6.30690  |
| O | -3.27950 | 6.19930 | 11.67310 |
| O | -3.32830 | 4.38350 | 10.20050 |
| C | -2.59550 | 5.64610 | 10.49040 |
| C | -2.83160 | 6.60940 | 9.31580  |
| H | -3.92110 | 6.72200 | 9.29300  |
| C | -2.27010 | 8.01280 | 9.57120  |
| H | -2.71380 | 8.70500 | 8.82190  |
| H | -2.59890 | 8.38310 | 10.56560 |
| C | -0.76710 | 8.09380 | 9.50270  |
| C | -0.11120 | 8.91400 | 8.60240  |
| H | -0.62550 | 9.54560 | 7.89000  |
| C | 1.43270  | 7.63520 | 10.02660 |
| H | 2.25440  | 7.16030 | 10.54630 |
| C | 0.10370  | 7.37240 | 10.30580 |
| C | -0.31720 | 6.39570 | 11.37320 |
| H | -0.87390 | 6.94890 | 12.15970 |
| H | 0.58570  | 5.97730 | 11.87040 |
| C | -1.16070 | 5.22670 | 10.85350 |
| H | -1.29700 | 4.55140 | 11.70620 |
| C | -0.45470 | 4.35250 | 9.77170  |
| H | 0.45660  | 3.94300 | 10.21480 |
| H | -1.11650 | 3.49850 | 9.59810  |
| C | -0.09570 | 4.97160 | 8.43830  |
| C | 1.15130  | 4.86240 | 7.90050  |
| H | 2.01510  | 4.37040 | 8.31260  |

|   |          |         |          |
|---|----------|---------|----------|
| C | -0.42630 | 6.17140 | 6.44680  |
| H | -0.86440 | 6.75930 | 5.65910  |
| C | -1.00970 | 5.72990 | 7.59610  |
| C | -2.45990 | 6.01340 | 7.92290  |
| H | -3.02860 | 5.08270 | 7.83390  |
| H | -2.85720 | 6.68450 | 7.15750  |
| C | -4.08860 | 5.14120 | 12.27830 |
| H | -4.91470 | 5.62450 | 12.79360 |
| H | -3.49530 | 4.56010 | 12.98870 |
| C | -4.50390 | 4.30960 | 11.07090 |
| H | -4.67900 | 3.25960 | 11.29350 |
| H | -5.37590 | 4.73410 | 10.56780 |

**B3LYP/6-31++G(d,p):UFF**

|   |          |         |          |
|---|----------|---------|----------|
| S | 1.66050  | 8.83870 | 8.70310  |
| S | 1.23550  | 5.65690 | 6.33650  |
| O | -3.26580 | 6.17070 | 11.66840 |
| O | -3.30760 | 4.39440 | 10.21860 |
| C | -2.60680 | 5.62880 | 10.51010 |
| C | -2.84050 | 6.59920 | 9.33050  |
| H | -3.93340 | 6.70680 | 9.30910  |
| C | -2.28660 | 8.00730 | 9.58970  |
| H | -2.73710 | 8.69990 | 8.84490  |
| H | -2.61350 | 8.37200 | 10.58680 |
| C | -0.78450 | 8.09590 | 9.51500  |
| C | -0.13570 | 8.91760 | 8.61100  |
| H | -0.65540 | 9.54600 | 7.89970  |
| C | 1.41920  | 7.64640 | 10.03030 |
| H | 2.24480  | 7.17530 | 10.54710 |
| C | 0.09220  | 7.37900 | 10.31510 |
| C | -0.32120 | 6.40140 | 11.38430 |
| H | -0.88130 | 6.95180 | 12.17020 |
| H | 0.58460  | 5.98990 | 11.88180 |
| C | -1.15790 | 5.22440 | 10.86430 |
| H | -1.28910 | 4.54780 | 11.72010 |
| C | -0.44360 | 4.35810 | 9.78640  |
| H | 0.48090  | 3.96530 | 10.22400 |
| H | -1.09100 | 3.48790 | 9.61980  |
| C | -0.10680 | 4.97390 | 8.44690  |
| C | 1.13820  | 4.87190 | 7.87850  |
| H | 2.00870  | 4.37790 | 8.28940  |
| C | -0.42150 | 6.15060 | 6.45450  |
| H | -0.86870 | 6.73650 | 5.66230  |
| C | -1.02030 | 5.72280 | 7.61290  |
| C | -2.46830 | 6.01470 | 7.93660  |
| H | -3.04220 | 5.08470 | 7.83630  |
| H | -2.85940 | 6.69350 | 7.17060  |
| C | -4.07450 | 5.15040 | 12.24980 |
| H | -4.90850 | 5.63240 | 12.76580 |
| H | -3.49850 | 4.55090 | 12.96940 |
| C | -4.47830 | 4.33010 | 11.03210 |
| H | -4.68740 | 3.27880 | 11.24740 |
| H | -5.34060 | 4.77420 | 10.51450 |

**B3LYP/cc-pVDZ:UFF**

|   |          |         |          |
|---|----------|---------|----------|
| S | 1.67840  | 8.82880 | 8.69900  |
| S | 1.23640  | 5.65580 | 6.33800  |
| O | -3.26610 | 6.17530 | 11.66230 |
| O | -3.30100 | 4.40130 | 10.20610 |
| C | -2.60580 | 5.63520 | 10.50940 |
| C | -2.83460 | 6.60740 | 9.33050  |
| H | -3.93310 | 6.72280 | 9.31480  |
| C | -2.27180 | 8.01680 | 9.58770  |
| H | -2.71980 | 8.71010 | 8.84210  |
| H | -2.59630 | 8.38330 | 10.58480 |
| C | -0.76970 | 8.09790 | 9.51180  |
| C | -0.11750 | 8.91490 | 8.60600  |
| H | -0.63450 | 9.54390 | 7.89350  |
| C | 1.43170  | 7.64060 | 10.02910 |
| H | 2.25500  | 7.16710 | 10.54740 |
| C | 0.10360  | 7.37950 | 10.31400 |
| C | -0.31490 | 6.40680 | 11.38540 |
| H | -0.87500 | 6.96090 | 12.16860 |
| H | 0.58850  | 5.99250 | 11.88480 |
| C | -1.15770 | 5.22920 | 10.86520 |
| H | -1.29230 | 4.55150 | 11.72770 |
| C | -0.45110 | 4.35870 | 9.78900  |
| H | 0.47330  | 3.94930 | 10.22630 |
| H | -1.11630 | 3.49420 | 9.62100  |
| C | -0.11090 | 4.97210 | 8.44970  |
| C | 1.13570  | 4.86930 | 7.88310  |
| H | 2.01040  | 4.37160 | 8.29800  |
| C | -0.42400 | 6.15080 | 6.45550  |
| H | -0.87340 | 6.74060 | 5.65850  |
| C | -1.02380 | 5.72230 | 7.61400  |
| C | -2.47040 | 6.01640 | 7.94010  |
| H | -3.04550 | 5.07820 | 7.85490  |
| H | -2.86970 | 6.68880 | 7.16440  |
| C | -4.06910 | 5.15340 | 12.23900 |
| H | -4.91660 | 5.62990 | 12.75290 |
| H | -3.49520 | 4.55260 | 12.97100 |
| C | -4.46300 | 4.32350 | 11.02470 |
| H | -4.66060 | 3.26470 | 11.24940 |
| H | -5.34380 | 4.75370 | 10.51040 |

**B3LYP/aug-cc-pVDZ:UFF**

|   |          |          |          |
|---|----------|----------|----------|
| S | 3.20400  | -1.89270 | -0.03580 |
| S | 3.14510  | 1.94760  | -0.09970 |
| O | -3.10610 | -1.10800 | 0.19700  |
| O | -2.96090 | 1.17280  | 0.10330  |
| C | -2.15580 | -0.03270 | 0.10570  |
| C | -1.32120 | -0.01470 | 1.40010  |
| H | -2.08960 | 0.02370  | 2.18980  |
| C | -0.52940 | -1.31330 | 1.62840  |
| H | -0.20170 | -1.33190 | 2.69120  |
| H | -1.19890 | -2.19080 | 1.50150  |

|   |          |          |          |
|---|----------|----------|----------|
| C | 0.66680  | -1.49840 | 0.73500  |
| C | 1.94580  | -1.67060 | 1.23290  |
| H | 2.17780  | -1.66870 | 2.28980  |
| C | 1.85950  | -1.73810 | -1.22330 |
| H | 2.01680  | -1.79390 | -2.29230 |
| C | 0.61820  | -1.53610 | -0.64700 |
| C | -0.63700 | -1.38930 | -1.46270 |
| H | -1.30170 | -2.25190 | -1.24280 |
| H | -0.38480 | -1.46490 | -2.54350 |
| C | -1.40120 | -0.07350 | -1.24450 |
| H | -2.20610 | -0.06060 | -1.99910 |
| C | -0.56930 | 1.20390  | -1.55320 |
| H | -0.29130 | 1.18020  | -2.61600 |
| H | -1.26060 | 2.05160  | -1.43340 |
| C | 0.67530  | 1.47460  | -0.74060 |
| C | 1.91590  | 1.67740  | -1.29540 |
| H | 2.16940  | 1.67500  | -2.35440 |
| C | 1.98450  | 1.73990  | 1.17560  |
| H | 2.29690  | 1.79020  | 2.21740  |
| C | 0.71500  | 1.51220  | 0.70140  |
| C | -0.47960 | 1.27850  | 1.59660  |
| H | -1.17950 | 2.12070  | 1.48520  |
| H | -0.13860 | 1.29900  | 2.64100  |
| C | -4.32960 | -0.65010 | -0.36950 |
| H | -5.14400 | -1.23250 | 0.07890  |
| H | -4.34070 | -0.79450 | -1.46210 |
| C | -4.34460 | 0.82900  | 0.01870  |
| H | -4.83060 | 1.46950  | -0.73140 |
| H | -4.82360 | 0.99030  | 0.99750  |

**BLYP/TZVP:UFF**

|   |          |          |          |
|---|----------|----------|----------|
| S | -3.15310 | 1.91880  | -0.17660 |
| S | -3.23020 | -2.00090 | -0.10830 |
| O | 3.24190  | 1.09860  | 0.34480  |
| O | 2.92320  | -1.29800 | 0.35300  |
| C | 2.19300  | 0.02120  | 0.22310  |
| C | 1.27790  | 0.12060  | 1.52830  |
| H | 2.01610  | 0.10420  | 2.36420  |
| C | 0.52740  | 1.46360  | 1.63850  |
| H | 0.16930  | 1.57090  | 2.68600  |
| H | 1.22960  | 2.30540  | 1.46090  |
| C | -0.63660 | 1.59790  | 0.69300  |
| C | -1.93400 | 1.77400  | 1.14000  |
| H | -2.20160 | 1.81380  | 2.18780  |
| C | -1.76860 | 1.73480  | -1.31260 |
| H | -1.89320 | 1.74040  | -2.38740 |
| C | -0.54320 | 1.57580  | -0.69020 |
| C | 0.73650  | 1.41170  | -1.46610 |
| H | 1.41540  | 2.25530  | -1.21840 |
| H | 0.52370  | 1.48810  | -2.55510 |
| C | 1.45840  | 0.07390  | -1.21380 |
| H | 2.28820  | 0.02690  | -1.95580 |
| C | 0.58750  | -1.22600 | -1.51140 |

|   |          |          |          |
|---|----------|----------|----------|
| H | 0.32370  | -1.22830 | -2.59200 |
| H | 1.27990  | -2.08500 | -1.34010 |
| C | -0.70480 | -1.46700 | -0.69110 |
| C | -1.93150 | -1.74880 | -1.28120 |
| H | -2.14440 | -1.81980 | -2.35920 |
| C | -2.09600 | -1.70730 | 1.21590  |
| H | -2.44880 | -1.74200 | 2.25840  |
| C | -0.80170 | -1.44270 | 0.78290  |
| C | 0.36970  | -1.16770 | 1.75990  |
| H | 1.07250  | -2.03420 | 1.73280  |
| H | -0.04020 | -1.11480 | 2.79250  |
| C | 4.41400  | 0.52730  | -0.38890 |
| H | 5.33730  | 0.85480  | 0.14930  |
| H | 4.47120  | 0.90170  | -1.44620 |
| C | 4.21660  | -1.05490 | -0.36110 |
| H | 4.20230  | -1.47120 | -1.40400 |
| H | 5.02300  | -1.57550 | 0.21240  |

**PBEPBE/TZVP:UFF**

|   |          |         |          |
|---|----------|---------|----------|
| S | 1.53890  | 9.19920 | 9.22800  |
| S | 1.27710  | 5.66280 | 6.37420  |
| O | -3.23460 | 6.15620 | 11.65280 |
| O | -3.34450 | 4.33870 | 10.22320 |
| C | -2.61070 | 5.56300 | 10.48460 |
| C | -2.82840 | 6.54370 | 9.31330  |
| H | -3.92820 | 6.64950 | 9.28390  |
| C | -2.30280 | 7.96950 | 9.58960  |
| H | -2.72550 | 8.63380 | 8.81870  |
| H | -2.74330 | 8.29440 | 10.54770 |
| C | -0.81240 | 8.17960 | 9.63250  |
| C | -0.17120 | 9.16700 | 8.92280  |
| H | -0.60820 | 9.87880 | 8.22670  |
| C | 1.39390  | 7.86270 | 10.32870 |
| H | 2.28060  | 7.47240 | 10.82240 |
| C | 0.09780  | 7.42070 | 10.45020 |
| C | -0.31120 | 6.31580 | 11.38850 |
| H | -0.87440 | 6.75240 | 12.23120 |
| H | 0.59990  | 5.87590 | 11.82510 |
| C | -1.16510 | 5.15300 | 10.83610 |
| H | -1.30600 | 4.47060 | 11.69390 |
| C | -0.48270 | 4.28870 | 9.75300  |
| H | 0.42250  | 3.84870 | 10.20190 |
| H | -1.16030 | 3.44400 | 9.54170  |
| C | -0.09650 | 4.95100 | 8.45700  |
| C | 1.15650  | 4.84400 | 7.90180  |
| H | 2.02510  | 4.33280 | 8.30970  |
| C | -0.38450 | 6.15950 | 6.47980  |
| H | -0.81920 | 6.76000 | 5.68440  |
| C | -0.99300 | 5.71630 | 7.63020  |
| C | -2.44820 | 5.95460 | 7.93680  |
| H | -2.99570 | 5.00170 | 7.83570  |
| H | -2.85980 | 6.62670 | 7.16660  |
| C | -4.09420 | 5.16770 | 12.23160 |



|   |          |         |          |
|---|----------|---------|----------|
| H | -4.90820 | 5.68830 | 12.75410 |
| H | -3.54570 | 4.52990 | 12.94970 |
| C | -4.53800 | 4.37390 | 11.01420 |
| H | -4.83290 | 3.33840 | 11.23160 |
| H | -5.35950 | 4.88490 | 10.47830 |

**PBE1PBE/TZVP : UFF**

|   |          |          |          |
|---|----------|----------|----------|
| S | 3.17450  | -1.90540 | -0.17170 |
| S | 3.13410  | 2.02660  | -0.11320 |
| O | -3.17130 | -1.10210 | 0.33640  |
| O | -2.90000 | 1.23750  | 0.33850  |
| C | -2.16310 | -0.03580 | 0.22090  |
| C | -1.26710 | -0.10990 | 1.50780  |
| H | -2.00540 | -0.09590 | 2.32820  |
| C | -0.50480 | -1.43570 | 1.64290  |
| H | -0.14400 | -1.51990 | 2.69170  |
| H | -1.19730 | -2.28960 | 1.48420  |
| C | 0.65920  | -1.58090 | 0.69900  |
| C | 1.95690  | -1.75400 | 1.14580  |
| H | 2.22550  | -1.78730 | 2.19350  |
| C | 1.78890  | -1.72660 | -1.30710 |
| H | 1.91200  | -1.73590 | -2.38200 |
| C | 0.56450  | -1.56540 | -0.68370 |
| C | -0.71660 | -1.39920 | -1.45660 |
| H | -1.38730 | -2.25280 | -1.22010 |
| H | -0.50330 | -1.46270 | -2.54650 |
| C | -1.44770 | -0.07700 | -1.19060 |
| H | -2.27480 | -0.04070 | -1.91860 |
| C | -0.61340 | 1.21160  | -1.48680 |
| H | -0.35660 | 1.22050  | -2.55720 |
| H | -1.30710 | 2.05370  | -1.31430 |
| C | 0.65940  | 1.46640  | -0.68530 |
| C | 1.86300  | 1.75810  | -1.26570 |
| H | 2.06920  | 1.82670  | -2.33400 |
| C | 2.02650  | 1.73020  | 1.19120  |
| H | 2.37250  | 1.77410  | 2.22410  |
| C | 0.75600  | 1.45010  | 0.76930  |
| C | -0.39730 | 1.17080  | 1.72850  |
| H | -1.10390 | 2.01840  | 1.68910  |
| H | 0.00480  | 1.13820  | 2.75250  |
| C | -4.32910 | -0.57130 | -0.37910 |
| H | -5.23980 | -0.90160 | 0.15470  |
| H | -4.38290 | -0.95130 | -1.42090 |
| C | -4.15790 | 0.98520  | -0.36150 |
| H | -4.14430 | 1.39260  | -1.39430 |
| H | -4.96900 | 1.49030  | 0.19620  |

**mPW1PW91/TZVP : UFF**

|   |          |          |          |
|---|----------|----------|----------|
| S | 3.16980  | -1.91320 | -0.16910 |
| S | 3.14400  | 2.02370  | -0.11340 |
| O | -3.17230 | -1.10100 | 0.33420  |
| O | -2.90560 | 1.24250  | 0.33530  |
| C | -2.16530 | -0.03080 | 0.21880  |

|   |          |          |          |
|---|----------|----------|----------|
| C | -1.26810 | -0.10400 | 1.50730  |
| H | -2.00580 | -0.08750 | 2.32820  |
| C | -0.50830 | -1.43130 | 1.64390  |
| H | -0.14800 | -1.51540 | 2.69280  |
| H | -1.20260 | -2.28400 | 1.48610  |
| C | 0.65520  | -1.58020 | 0.70010  |
| C | 1.95210  | -1.75680 | 1.14770  |
| H | 2.21990  | -1.79040 | 2.19560  |
| C | 1.78510  | -1.73170 | -1.30520 |
| H | 1.90860  | -1.74270 | -2.38010 |
| C | 0.56090  | -1.56630 | -0.68260 |
| C | -0.71960 | -1.39820 | -1.45660 |
| H | -1.39250 | -2.24980 | -1.21980 |
| H | -0.50530 | -1.46360 | -2.54620 |
| C | -1.44710 | -0.07340 | -1.19320 |
| H | -2.27290 | -0.03530 | -1.92270 |
| C | -0.60630 | 1.21270  | -1.49180 |
| H | -0.34670 | 1.21520  | -2.56160 |
| H | -1.29630 | 2.05910  | -1.32670 |
| C | 0.66700  | 1.46650  | -0.68780 |
| C | 1.87200  | 1.75540  | -1.26750 |
| H | 2.07960  | 1.82240  | -2.33570 |
| C | 2.03320  | 1.73020  | 1.19130  |
| H | 2.37840  | 1.77490  | 2.22440  |
| C | 0.76220  | 1.45170  | 0.76830  |
| C | -0.39320 | 1.17530  | 1.72820  |
| H | -1.09600 | 2.02600  | 1.69130  |
| H | 0.00930  | 1.13950  | 2.75210  |
| C | -4.33580 | -0.57140 | -0.37610 |
| H | -5.24320 | -0.90470 | 0.16160  |
| H | -4.39340 | -0.95100 | -1.41790 |
| C | -4.16880 | 0.98650  | -0.35740 |
| H | -4.16350 | 1.39620  | -1.38920 |
| H | -4.97760 | 1.48800  | 0.20690  |

**X3LYP/TZVP : UFF**

|   |          |         |          |
|---|----------|---------|----------|
| S | 1.66030  | 8.84410 | 8.70590  |
| S | 1.23050  | 5.66250 | 6.34610  |
| O | -3.26100 | 6.17020 | 11.66250 |
| O | -3.30280 | 4.39590 | 10.21700 |
| C | -2.60290 | 5.62870 | 10.50690 |
| C | -2.83610 | 6.59460 | 9.32980  |
| H | -3.92600 | 6.70120 | 9.30890  |
| C | -2.28610 | 8.00280 | 9.58600  |
| H | -2.73700 | 8.69280 | 8.83890  |
| H | -2.61540 | 8.36960 | 10.58140 |
| C | -0.78420 | 8.09540 | 9.51370  |
| C | -0.13610 | 8.91990 | 8.61180  |
| H | -0.65610 | 9.54820 | 7.90080  |
| C | 1.41950  | 7.64900 | 10.03080 |
| H | 2.24520  | 7.17790 | 10.54760 |
| C | 0.09280  | 7.37890 | 10.31360 |
| C | -0.32050 | 6.39810 | 11.37990 |

|   |          |         |          |
|---|----------|---------|----------|
| H | -0.87880 | 6.94700 | 12.16810 |
| H | 0.58560  | 5.98450 | 11.87530 |
| C | -1.15830 | 5.22490 | 10.85860 |
| H | -1.28920 | 4.54990 | 11.71170 |
| C | -0.45000 | 4.36020 | 9.78310  |
| H | 0.46990  | 3.96330 | 10.21850 |
| H | -1.09920 | 3.49590 | 9.61530  |
| C | -0.11150 | 4.97470 | 8.44900  |
| C | 1.12830  | 4.87460 | 7.88860  |
| H | 1.99610  | 4.38350 | 8.29990  |
| C | -0.43000 | 6.15080 | 6.46640  |
| H | -0.87690 | 6.73550 | 5.67800  |
| C | -1.02240 | 5.72080 | 7.61770  |
| C | -2.46610 | 6.00830 | 7.94180  |
| H | -3.03500 | 5.07890 | 7.84570  |
| H | -2.85940 | 6.68070 | 7.17610  |
| C | -4.06730 | 5.15160 | 12.24160 |
| H | -4.90000 | 5.62810 | 12.75730 |
| H | -3.49360 | 4.55110 | 12.95690 |
| C | -4.47100 | 4.33510 | 11.02770 |
| H | -4.68490 | 3.28890 | 11.24480 |
| H | -5.32970 | 4.78120 | 10.51320 |

**TPSSh/TZVP : UFF**

|   |          |         |          |
|---|----------|---------|----------|
| S | 1.67010  | 8.83200 | 8.70280  |
| S | 1.22970  | 5.64050 | 6.35590  |
| O | -3.28670 | 6.18370 | 11.64800 |
| O | -3.30250 | 4.40630 | 10.19220 |
| C | -2.61060 | 5.64630 | 10.49690 |
| C | -2.84130 | 6.61340 | 9.32160  |
| H | -3.93260 | 6.71930 | 9.29960  |
| C | -2.28410 | 8.01950 | 9.57560  |
| H | -2.72920 | 8.71000 | 8.82560  |
| H | -2.61420 | 8.38930 | 10.56980 |
| C | -0.78130 | 8.10270 | 9.50750  |
| C | -0.12550 | 8.91740 | 8.60230  |
| H | -0.63970 | 9.54390 | 7.88530  |
| C | 1.41830  | 7.64710 | 10.03480 |
| H | 2.23960  | 7.17460 | 10.55720 |
| C | 0.08910  | 7.38630 | 10.31490 |
| C | -0.33320 | 6.41420 | 11.38560 |
| H | -0.89600 | 6.96930 | 12.16620 |
| H | 0.56840  | 6.00100 | 11.88930 |
| C | -1.17110 | 5.24030 | 10.86590 |
| H | -1.31400 | 4.56680 | 11.72040 |
| C | -0.46110 | 4.36560 | 9.79760  |
| H | 0.45940  | 3.97060 | 10.23690 |
| H | -1.11660 | 3.50340 | 9.63480  |
| C | -0.12130 | 4.97240 | 8.45920  |
| C | 1.12260  | 4.86390 | 7.90030  |
| H | 1.98990  | 4.37090 | 8.31430  |
| C | -0.42530 | 6.13850 | 6.46680  |
| H | -0.86500 | 6.72110 | 5.67070  |

|   |          |         |          |
|---|----------|---------|----------|
| C | -1.02570 | 5.71760 | 7.62180  |
| C | -2.47000 | 6.01790 | 7.93630  |
| H | -3.04540 | 5.09010 | 7.84720  |
| H | -2.85410 | 6.69090 | 7.16460  |
| C | -4.04390 | 5.12890 | 12.23880 |
| H | -4.86950 | 5.57980 | 12.78940 |
| H | -3.42720 | 4.53140 | 12.92210 |
| C | -4.46270 | 4.32690 | 11.02080 |
| H | -4.66230 | 3.27360 | 11.22170 |
| H | -5.33040 | 4.77830 | 10.52400 |

**BHandH/TZVP:UFF**

|   |          |         |          |
|---|----------|---------|----------|
| S | 1.65070  | 8.87430 | 8.70820  |
| S | 1.18060  | 5.65620 | 6.41210  |
| O | -3.24390 | 6.15620 | 11.61610 |
| O | -3.26220 | 4.43080 | 10.19430 |
| C | -2.59020 | 5.63920 | 10.48910 |
| C | -2.82790 | 6.58420 | 9.32910  |
| H | -3.91760 | 6.67790 | 9.32140  |
| C | -2.29290 | 8.00000 | 9.56990  |
| H | -2.74700 | 8.67700 | 8.81290  |
| H | -2.63020 | 8.37550 | 10.55970 |
| C | -0.79160 | 8.10800 | 9.50500  |
| C | -0.14580 | 8.93760 | 8.60620  |
| H | -0.66740 | 9.56240 | 7.89320  |
| C | 1.41280  | 7.67530 | 10.03010 |
| H | 2.23940  | 7.20860 | 10.54950 |
| C | 0.08670  | 7.39640 | 10.30700 |
| C | -0.32650 | 6.40980 | 11.36790 |
| H | -0.87950 | 6.95710 | 12.16120 |
| H | 0.57970  | 5.99040 | 11.85820 |
| C | -1.17160 | 5.24300 | 10.84590 |
| H | -1.32000 | 4.57840 | 11.70240 |
| C | -0.48950 | 4.37640 | 9.79460  |
| H | 0.41900  | 3.95480 | 10.22360 |
| H | -1.16190 | 3.53280 | 9.62380  |
| C | -0.14530 | 4.97960 | 8.48120  |
| C | 1.08190  | 4.88260 | 7.92930  |
| H | 1.94410  | 4.39240 | 8.34880  |
| C | -0.45310 | 6.13550 | 6.51800  |
| H | -0.90350 | 6.71580 | 5.73050  |
| C | -1.04410 | 5.71350 | 7.65500  |
| C | -2.46930 | 5.98800 | 7.97280  |
| H | -3.02330 | 5.04920 | 7.90540  |
| H | -2.87310 | 6.63210 | 7.19220  |
| C | -4.00630 | 5.14130 | 12.18590 |
| H | -4.83200 | 5.58700 | 12.73290 |
| H | -3.40830 | 4.52960 | 12.86810 |
| C | -4.41270 | 4.35960 | 10.97590 |
| H | -4.64380 | 3.31610 | 11.17170 |
| H | -5.26160 | 4.83010 | 10.47140 |

**M06/TZVP:UFF**

|   |          |         |          |
|---|----------|---------|----------|
| S | 1.46090  | 9.03020 | 8.56980  |
| S | 1.17790  | 5.97700 | 6.26140  |
| O | -3.18430 | 6.16470 | 11.62300 |
| O | -3.32060 | 4.33690 | 10.28780 |
| C | -2.60910 | 5.56720 | 10.45660 |
| C | -2.92270 | 6.48860 | 9.27770  |
| H | -4.01840 | 6.56110 | 9.31690  |
| C | -2.41920 | 7.92810 | 9.45870  |
| H | -2.90730 | 8.56390 | 8.68720  |
| H | -2.75910 | 8.32730 | 10.43800 |
| C | -0.92240 | 8.09920 | 9.37940  |
| C | -0.33620 | 8.98370 | 8.49100  |
| H | -0.90250 | 9.59520 | 7.80090  |
| C | 1.31300  | 7.79120 | 9.86630  |
| H | 2.17480  | 7.37000 | 10.36700 |
| C | 0.01060  | 7.42430 | 10.15740 |
| C | -0.30800 | 6.40150 | 11.21970 |
| H | -0.82380 | 6.92220 | 12.05450 |
| H | 0.63860  | 6.00560 | 11.64970 |
| C | -1.15210 | 5.20820 | 10.74930 |
| H | -1.24020 | 4.55270 | 11.62680 |
| C | -0.49230 | 4.34150 | 9.66670  |
| H | 0.45410  | 3.93060 | 10.08280 |
| H | -1.13220 | 3.46110 | 9.44500  |
| C | -0.20530 | 5.04930 | 8.36580  |
| C | 1.06510  | 5.08080 | 7.81770  |
| H | 1.92390  | 4.61400 | 8.28180  |
| C | -0.58760 | 6.27210 | 6.44560  |
| H | -1.15990 | 6.83670 | 5.72140  |
| C | -1.14030 | 5.72340 | 7.58960  |
| C | -2.60770 | 5.86540 | 7.91020  |
| H | -3.07430 | 4.85990 | 7.83770  |
| H | -3.10040 | 6.48430 | 7.12790  |
| C | -3.96590 | 5.19550 | 12.27640 |
| H | -4.75340 | 5.69960 | 12.83800 |
| H | -3.36130 | 4.59200 | 12.96930 |
| C | -4.45460 | 4.36480 | 11.11870 |
| H | -4.72570 | 3.34050 | 11.37730 |
| H | -5.30780 | 4.84640 | 10.61880 |

**M062X/TZVP:UFF**

|   |          |         |          |
|---|----------|---------|----------|
| S | 1.53890  | 9.19920 | 9.22800  |
| S | 1.27710  | 5.66280 | 6.37420  |
| O | -3.23460 | 6.15620 | 11.65280 |
| O | -3.34450 | 4.33870 | 10.22320 |
| C | -2.61070 | 5.56300 | 10.48460 |
| C | -2.82840 | 6.54370 | 9.31330  |
| H | -3.92820 | 6.64950 | 9.28390  |
| C | -2.30280 | 7.96950 | 9.58960  |
| H | -2.72550 | 8.63380 | 8.81870  |
| H | -2.74330 | 8.29440 | 10.54770 |
| C | -0.81240 | 8.17960 | 9.63250  |
| C | -0.17120 | 9.16700 | 8.92280  |

|   |          |         |          |
|---|----------|---------|----------|
| H | -0.60820 | 9.87880 | 8.22670  |
| C | 1.39390  | 7.86270 | 10.32870 |
| H | 2.28060  | 7.47240 | 10.82240 |
| C | 0.09780  | 7.42070 | 10.45020 |
| C | -0.31120 | 6.31580 | 11.38850 |
| H | -0.87440 | 6.75240 | 12.23120 |
| H | 0.59990  | 5.87590 | 11.82510 |
| C | -1.16510 | 5.15300 | 10.83610 |
| H | -1.30600 | 4.47060 | 11.69390 |
| C | -0.48270 | 4.28870 | 9.75300  |
| H | 0.42250  | 3.84870 | 10.20190 |
| H | -1.16030 | 3.44400 | 9.54170  |
| C | -0.09650 | 4.95100 | 8.45700  |
| C | 1.15650  | 4.84400 | 7.90180  |
| H | 2.02510  | 4.33280 | 8.30970  |
| C | -0.38450 | 6.15950 | 6.47980  |
| H | -0.81920 | 6.76000 | 5.68440  |
| C | -0.99300 | 5.71630 | 7.63020  |
| C | -2.44820 | 5.95460 | 7.93680  |
| H | -2.99570 | 5.00170 | 7.83570  |
| H | -2.85980 | 6.62670 | 7.16660  |
| C | -4.09420 | 5.16770 | 12.23160 |
| H | -4.90820 | 5.68830 | 12.75410 |
| H | -3.54570 | 4.52990 | 12.94970 |
| C | -4.53800 | 4.37390 | 11.01420 |
| H | -4.83290 | 3.33840 | 11.23160 |
| H | -5.35950 | 4.88490 | 10.47830 |

**M06HF/TZVP:UFF**

|   |          |         |          |
|---|----------|---------|----------|
| S | 1.66340  | 8.84490 | 8.68300  |
| S | 1.21650  | 5.68910 | 6.37980  |
| O | -3.24200 | 6.16250 | 11.65380 |
| O | -3.28060 | 4.40790 | 10.21700 |
| C | -2.58970 | 5.62910 | 10.50440 |
| C | -2.83500 | 6.59360 | 9.33150  |
| H | -3.92470 | 6.68590 | 9.32700  |
| C | -2.27940 | 7.99890 | 9.57370  |
| H | -2.73310 | 8.68390 | 8.82400  |
| H | -2.60410 | 8.37250 | 10.56830 |
| C | -0.77780 | 8.09050 | 9.49580  |
| C | -0.13320 | 8.91520 | 8.59150  |
| H | -0.65620 | 9.54200 | 7.88120  |
| C | 1.42800  | 7.65080 | 10.00960 |
| H | 2.25600  | 7.18380 | 10.52640 |
| C | 0.10240  | 7.37740 | 10.29540 |
| C | -0.30570 | 6.40090 | 11.36770 |
| H | -0.85720 | 6.95440 | 12.15750 |
| H | 0.60280  | 5.98690 | 11.85820 |
| C | -1.14890 | 5.22850 | 10.86240 |
| H | -1.29510 | 4.55750 | 11.71390 |
| C | -0.46380 | 4.34360 | 9.78700  |
| H | 0.45230  | 3.93750 | 10.21380 |
| H | -1.13990 | 3.50760 | 9.60720  |

|   |          |         |          |
|---|----------|---------|----------|
| C | -0.11690 | 4.97200 | 8.45660  |
| C | 1.11930  | 4.89100 | 7.90340  |
| H | 1.98690  | 4.40390 | 8.31580  |
| C | -0.43860 | 6.15650 | 6.48550  |
| H | -0.88790 | 6.73860 | 5.69880  |
| C | -1.03280 | 5.71610 | 7.62310  |
| C | -2.48480 | 5.98340 | 7.94770  |
| H | -3.02770 | 5.04020 | 7.88590  |
| H | -2.88370 | 6.64140 | 7.17660  |
| C | -4.05470 | 5.15610 | 12.23240 |
| H | -4.88600 | 5.63630 | 12.73800 |
| H | -3.47980 | 4.54840 | 12.93120 |
| C | -4.46050 | 4.34590 | 11.00260 |
| H | -4.67840 | 3.30380 | 11.21220 |
| H | -5.29340 | 4.81590 | 10.47990 |

**BLYP/TZVP**

|   |          |          |          |
|---|----------|----------|----------|
| S | -3.08180 | 2.38140  | 0.01660  |
| S | -3.08190 | -2.38090 | -0.01660 |
| O | 2.99130  | 1.16480  | 0.03100  |
| O | 2.99190  | -1.16440 | -0.03080 |
| C | 2.10500  | 0.00010  | 0.00010  |
| C | 1.30730  | 0.00070  | 1.33260  |
| H | 2.10000  | -0.00420 | 2.09800  |
| C | 0.52180  | 1.31970  | 1.59430  |
| H | 0.20170  | 1.30570  | 2.64640  |
| H | 1.24650  | 2.14370  | 1.50790  |
| C | -0.68600 | 1.63000  | 0.73300  |
| C | -1.89820 | 2.01410  | 1.25760  |
| H | -2.17430 | 2.10090  | 2.30320  |
| C | -1.90910 | 2.00310  | -1.23140 |
| H | -2.19420 | 2.08170  | -2.27520 |
| C | -0.69230 | 1.62340  | -0.71420 |
| C | 0.51000  | 1.31290  | -1.58360 |
| H | 1.23120  | 2.14070  | -1.50120 |
| H | 0.18260  | 1.29800  | -2.63340 |
| C | 1.30730  | -0.00110 | -1.33250 |
| H | 2.10010  | 0.00400  | -2.09790 |
| C | 0.52220  | -1.32030 | -1.59400 |
| H | 0.20250  | -1.30680 | -2.64630 |
| H | 1.24710  | -2.14410 | -1.50700 |
| C | -0.68580 | -1.63040 | -0.73300 |
| C | -1.89810 | -2.01410 | -1.25760 |
| H | -2.17420 | -2.10090 | -2.30320 |
| C | -1.90900 | -2.00320 | 1.23140  |
| H | -2.19420 | -2.08180 | 2.27520  |
| C | -0.69210 | -1.62380 | 0.71430  |
| C | 0.51030  | -1.31360 | 1.58340  |
| H | 1.23170  | -2.14120 | 1.50050  |
| H | 0.18320  | -1.29910 | 2.63330  |
| C | 4.33110  | 0.71490  | -0.27130 |
| H | 5.03360  | 1.38810  | 0.23410  |
| H | 4.51960  | 0.73590  | -1.35780 |

|   |         |          |          |
|---|---------|----------|----------|
| C | 4.33150 | -0.71390 | 0.27100  |
| H | 5.03420 | -1.38670 | -0.23450 |
| H | 4.52030 | -0.73480 | 1.35760  |

**PBEPBE/TZVP**

|   |          |         |          |
|---|----------|---------|----------|
| S | 1.53890  | 9.19920 | 9.22800  |
| S | 1.27710  | 5.66280 | 6.37420  |
| O | -3.23460 | 6.15620 | 11.65280 |
| O | -3.34450 | 4.33870 | 10.22320 |
| C | -2.61070 | 5.56300 | 10.48460 |
| C | -2.82840 | 6.54370 | 9.31330  |
| H | -3.92820 | 6.64950 | 9.28390  |
| C | -2.30280 | 7.96950 | 9.58960  |
| H | -2.72550 | 8.63380 | 8.81870  |
| H | -2.74330 | 8.29440 | 10.54770 |
| C | -0.81240 | 8.17960 | 9.63250  |
| C | -0.17120 | 9.16700 | 8.92280  |
| H | -0.60820 | 9.87880 | 8.22670  |
| C | 1.39390  | 7.86270 | 10.32870 |
| H | 2.28060  | 7.47240 | 10.82240 |
| C | 0.09780  | 7.42070 | 10.45020 |
| C | -0.31120 | 6.31580 | 11.38850 |
| H | -0.87440 | 6.75240 | 12.23120 |
| H | 0.59990  | 5.87590 | 11.82510 |
| C | -1.16510 | 5.15300 | 10.83610 |
| H | -1.30600 | 4.47060 | 11.69390 |
| C | -0.48270 | 4.28870 | 9.75300  |
| H | 0.42250  | 3.84870 | 10.20190 |
| H | -1.16030 | 3.44400 | 9.54170  |
| C | -0.09650 | 4.95100 | 8.45700  |
| C | 1.15650  | 4.84400 | 7.90180  |
| H | 2.02510  | 4.33280 | 8.30970  |
| C | -0.38450 | 6.15950 | 6.47980  |
| H | -0.81920 | 6.76000 | 5.68440  |
| C | -0.99300 | 5.71630 | 7.63020  |
| C | -2.44820 | 5.95460 | 7.93680  |
| H | -2.99570 | 5.00170 | 7.83570  |
| H | -2.85980 | 6.62670 | 7.16660  |
| C | -4.09420 | 5.16770 | 12.23160 |
| H | -4.90820 | 5.68830 | 12.75410 |
| H | -3.54570 | 4.52990 | 12.94970 |
| C | -4.53800 | 4.37390 | 11.01420 |
| H | -4.83290 | 3.33840 | 11.23160 |
| H | -5.35950 | 4.88490 | 10.47830 |

**PBE1PBE/TZVP**

|   |          |          |          |
|---|----------|----------|----------|
| S | 3.05490  | 2.24550  | -0.01190 |
| S | 3.05490  | -2.24490 | 0.01190  |
| O | -2.95400 | 1.13990  | -0.02000 |
| O | -2.95470 | -1.13930 | 0.02020  |
| C | -2.09240 | 0.00000  | 0.00010  |
| C | -1.30580 | 0.00920  | -1.31550 |
| H | -2.10130 | 0.00560  | -2.07150 |



|   |          |          |          |
|---|----------|----------|----------|
| C | -0.53420 | 1.31020  | -1.56470 |
| H | -0.22700 | 1.31630  | -2.61510 |
| H | -1.24660 | 2.13440  | -1.45040 |
| C | 0.67230  | 1.58380  | -0.72010 |
| C | 1.88350  | 1.93430  | -1.23580 |
| H | 2.15550  | 2.02040  | -2.27780 |
| C | 1.90120  | 1.90050  | 1.21970  |
| H | 2.18820  | 1.95930  | 2.25950  |
| C | 0.68230  | 1.56400  | 0.71240  |
| C | -0.51480 | 1.27960  | 1.56750  |
| H | -1.22130 | 2.11180  | 1.47350  |
| H | -0.19440 | 1.26860  | 2.61380  |
| C | -1.30570 | -0.00970 | 1.31560  |
| H | -2.10120 | -0.00590 | 2.07160  |
| C | -0.53460 | -1.31110 | 1.56450  |
| H | -0.22790 | -1.31790 | 2.61490  |
| H | -1.24730 | -2.13500 | 1.44940  |
| C | 0.67200  | -1.58440 | 0.72010  |
| C | 1.88340  | -1.93440 | 1.23580  |
| H | 2.15540  | -2.02040 | 2.27780  |
| C | 1.90110  | -1.90060 | -1.21970 |
| H | 2.18800  | -1.95930 | -2.25960 |
| C | 0.68210  | -1.56460 | -0.71240 |
| C | -0.51540 | -1.28050 | -1.56720 |
| H | -1.22200 | -2.11240 | -1.47240 |
| H | -0.19540 | -1.27010 | -2.61360 |
| C | -4.26600 | 0.70390  | 0.27700  |
| H | -4.97300 | 1.37710  | -0.20940 |
| H | -4.44950 | 0.70620  | 1.35920  |
| C | -4.26640 | -0.70250 | -0.27720 |
| H | -4.97390 | -1.37530 | 0.20910  |
| H | -4.44960 | -0.70470 | -1.35940 |

### B3LYP/TZVP

|   |          |         |          |
|---|----------|---------|----------|
| S | 1.53340  | 9.22640 | 9.27300  |
| S | 1.25440  | 5.62120 | 6.34740  |
| O | -3.22520 | 6.14990 | 11.64400 |
| O | -3.33980 | 4.35290 | 10.22240 |
| C | -2.60570 | 5.56580 | 10.48120 |
| C | -2.82140 | 6.54630 | 9.31190  |
| H | -3.91100 | 6.65550 | 9.28160  |
| C | -2.29590 | 7.97110 | 9.58860  |
| H | -2.70950 | 8.62710 | 8.81810  |
| H | -2.73940 | 8.29660 | 10.53430 |
| C | -0.80700 | 8.18850 | 9.64400  |
| C | -0.17310 | 9.18000 | 8.95450  |
| H | -0.61040 | 9.88830 | 8.26830  |
| C | 1.38510  | 7.87850 | 10.35780 |
| H | 2.26070  | 7.49090 | 10.85490 |
| C | 0.10140  | 7.42960 | 10.46210 |
| C | -0.30650 | 6.31400 | 11.38800 |
| H | -0.86010 | 6.74010 | 12.23020 |
| H | 0.59940  | 5.87310 | 11.81230 |

|   |          |         |          |
|---|----------|---------|----------|
| C | -1.16160 | 5.15590 | 10.83010 |
| H | -1.29800 | 4.47720 | 11.67910 |
| C | -0.48060 | 4.29160 | 9.74760  |
| H | 0.42130  | 3.86230 | 10.19200 |
| H | -1.14910 | 3.44970 | 9.54450  |
| C | -0.10040 | 4.94240 | 8.44400  |
| C | 1.13710  | 4.82020 | 7.88380  |
| H | 1.99560  | 4.30760 | 8.28870  |
| C | -0.40140 | 6.13100 | 6.46730  |
| H | -0.83930 | 6.72190 | 5.67810  |
| C | -0.99740 | 5.70660 | 7.61840  |
| C | -2.44830 | 5.95870 | 7.93380  |
| H | -2.99970 | 5.01930 | 7.82970  |
| H | -2.85160 | 6.63310 | 7.17370  |
| C | -4.09840 | 5.18310 | 12.22350 |
| H | -4.91560 | 5.71080 | 12.71450 |
| H | -3.56960 | 4.56780 | 12.96050 |
| C | -4.52360 | 4.36380 | 11.01730 |
| H | -4.78920 | 3.33280 | 11.24970 |
| H | -5.35260 | 4.83950 | 10.48090 |

**mPW1PW91/TZVP**

|   |          |          |          |
|---|----------|----------|----------|
| S | 3.05200  | 2.26540  | -0.01370 |
| S | 3.05210  | -2.26470 | 0.01360  |
| O | -2.95310 | 1.13980  | -0.02270 |
| O | -2.95400 | -1.13920 | 0.02280  |
| C | -2.09070 | -0.00000 | 0.00010  |
| C | -1.30360 | 0.00610  | -1.31540 |
| H | -2.09710 | 0.00200  | -2.07110 |
| C | -0.53080 | 1.30660  | -1.56770 |
| H | -0.22230 | 1.30850  | -2.61610 |
| H | -1.24260 | 2.13000  | -1.45870 |
| C | 0.67410  | 1.58610  | -0.72210 |
| C | 1.88280  | 1.94240  | -1.23770 |
| H | 2.15460  | 2.02760  | -2.27830 |
| C | 1.89830  | 1.91640  | 1.21790  |
| H | 2.18320  | 1.98080  | 2.25650  |
| C | 0.68300  | 1.57080  | 0.71060  |
| C | -0.51380 | 1.28430  | 1.56590  |
| H | -1.22040 | 2.11430  | 1.47190  |
| H | -0.19380 | 1.27450  | 2.61080  |
| C | -1.30350 | -0.00680 | 1.31550  |
| H | -2.09710 | -0.00250 | 2.07120  |
| C | -0.53130 | -1.30770 | 1.56740  |
| H | -0.22330 | -1.31030 | 2.61590  |
| H | -1.24330 | -2.13080 | 1.45750  |
| C | 0.67390  | -1.58680 | 0.72210  |
| C | 1.88280  | -1.94240 | 1.23770  |
| H | 2.15470  | -2.02750 | 2.27830  |
| C | 1.89820  | -1.91650 | -1.21800 |
| H | 2.18310  | -1.98080 | -2.25650 |
| C | 0.68270  | -1.57150 | -0.71060 |
| C | -0.51440 | -1.28540 | -1.56550 |

|   |          |          |          |
|---|----------|----------|----------|
| H | -1.22130 | -2.11510 | -1.47050 |
| H | -0.19500 | -1.27630 | -2.61060 |
| C | -4.26690 | 0.70610  | 0.27230  |
| H | -4.97060 | 1.37550  | -0.22090 |
| H | -4.45400 | 0.71700  | 1.35210  |
| C | -4.26730 | -0.70450 | -0.27240 |
| H | -4.97160 | -1.37330 | 0.22050  |
| H | -4.45420 | -0.71530 | -1.35230 |

**X3LYP/TZVP**

|   |          |          |          |
|---|----------|----------|----------|
| S | -3.06280 | 2.30870  | 0.01460  |
| S | -3.06210 | -2.30940 | -0.01550 |
| O | 2.96530  | 1.14570  | 0.02580  |
| O | 2.96560  | -1.14530 | -0.02370 |
| C | 2.09400  | 0.00030  | 0.00080  |
| C | 1.30310  | 0.00370  | 1.32190  |
| H | 2.09360  | -0.00080 | 2.08020  |
| C | 0.52600  | 1.31110  | 1.57800  |
| H | 0.21220  | 1.30520  | 2.62500  |
| H | 1.24200  | 2.13230  | 1.48000  |
| C | -0.67920 | 1.60550  | 0.72640  |
| C | -1.88610 | 1.97000  | 1.24430  |
| H | -2.15720 | 2.05390  | 2.28490  |
| C | -1.89930 | 1.95070  | -1.22210 |
| H | -2.18140 | 2.01950  | -2.26090 |
| C | -0.68680 | 1.59400  | -0.71170 |
| C | 0.51160  | 1.29570  | -1.57210 |
| H | 1.22270  | 2.12260  | -1.48500 |
| H | 0.18810  | 1.28190  | -2.61620 |
| C | 1.30370  | -0.00390 | -1.32090 |
| H | 2.09450  | 0.00100  | -2.07880 |
| C | 0.52770  | -1.31190 | -1.57700 |
| H | 0.21480  | -1.30680 | -2.62430 |
| H | 1.24410  | -2.13260 | -1.47770 |
| C | -0.67810 | -1.60630 | -0.72620 |
| C | -1.88480 | -1.97040 | -1.24470 |
| H | -2.15550 | -2.05410 | -2.28540 |
| C | -1.89920 | -1.95100 | 1.22180  |
| H | -2.18190 | -2.01970 | 2.26040  |
| C | -0.68630 | -1.59490 | 0.71200  |
| C | 0.51180  | -1.29650 | 1.57260  |
| H | 1.22340  | -2.12290 | 1.48500  |
| H | 0.18830  | -1.28350 | 2.61660  |
| C | 4.28940  | 0.71090  | -0.26860 |
| H | 4.98880  | 1.37750  | 0.23470  |
| H | 4.47940  | 0.73350  | -1.34760 |
| C | 4.29060  | -0.70970 | 0.26590  |
| H | 4.98860  | -1.37600 | -0.23980 |
| H | 4.48440  | -0.73220 | 1.34420  |

**TPSS/TZVP**

|   |         |         |         |
|---|---------|---------|---------|
| S | 1.54170 | 9.19775 | 9.22634 |
| S | 1.28139 | 5.65819 | 6.37604 |

|   |          |         |          |
|---|----------|---------|----------|
| O | -3.24012 | 6.16024 | 11.64726 |
| O | -3.34759 | 4.34179 | 10.21600 |
| C | -2.61064 | 5.56807 | 10.47853 |
| C | -2.83371 | 6.54899 | 9.30916  |
| H | -3.92773 | 6.65290 | 9.27995  |
| C | -2.30545 | 7.97774 | 9.59026  |
| H | -2.72584 | 8.64128 | 8.82484  |
| H | -2.73886 | 8.29362 | 10.54828 |
| C | -0.81125 | 8.18145 | 9.62962  |
| C | -0.17098 | 9.16606 | 8.92223  |
| H | -0.60561 | 9.87656 | 8.23119  |
| C | 1.39127  | 7.85924 | 10.32745 |
| H | 2.27237  | 7.46996 | 10.82075 |
| C | 0.09765  | 7.42069 | 10.44703 |
| C | -0.31351 | 6.31892 | 11.39244 |
| H | -0.88044 | 6.75762 | 12.22436 |
| H | 0.59246  | 5.88160 | 11.82930 |
| C | -1.16923 | 5.15221 | 10.83852 |
| H | -1.31325 | 4.47477 | 11.69231 |
| C | -0.48636 | 4.28356 | 9.75311  |
| H | 0.41292  | 3.84308 | 10.20053 |
| H | -1.16798 | 3.45001 | 9.53882  |
| C | -0.09641 | 4.95157 | 8.45796  |
| C | 1.15362  | 4.83987 | 7.90591  |
| H | 2.01524  | 4.32672 | 8.31279  |
| C | -0.38092 | 6.15976 | 6.48293  |
| H | -0.81192 | 6.75764 | 5.69045  |
| C | -0.98963 | 5.71987 | 7.63018  |
| C | -2.44939 | 5.95808 | 7.92948  |
| H | -2.99200 | 5.00844 | 7.83177  |
| H | -2.85493 | 6.62880 | 7.16231  |
| C | -4.08941 | 5.16017 | 12.23657 |
| H | -4.89383 | 5.67945 | 12.76289 |
| H | -3.52701 | 4.53190 | 12.94201 |
| C | -4.53978 | 4.36737 | 11.02005 |
| H | -4.81789 | 3.33206 | 11.23160 |
| H | -5.35998 | 4.87301 | 10.49077 |

**TPSSh/TZVP**

|   |          |          |          |
|---|----------|----------|----------|
| S | 3.06680  | 2.26945  | -0.01471 |
| S | 3.06684  | -2.26837 | 0.01447  |
| O | -2.96539 | 1.15090  | -0.02577 |
| O | -2.96649 | -1.14979 | 0.02631  |
| C | -2.09359 | 0.00017  | 0.00019  |
| C | -1.31062 | 0.00531  | -1.32320 |
| H | -2.10676 | 0.00101  | -2.07814 |
| C | -0.53334 | 1.31324  | -1.57689 |
| H | -0.22309 | 1.31375  | -2.62640 |
| H | -1.24824 | 2.13566  | -1.46457 |
| C | 0.67646  | 1.59039  | -0.72525 |
| C | 1.89034  | 1.94474  | -1.24399 |
| H | 2.16505  | 2.02928  | -2.28513 |
| C | 1.90514  | 1.92141  | 1.22224  |

|   |          |          |          |
|---|----------|----------|----------|
| H | 2.19223  | 1.98758  | 2.26135  |
| C | 0.68495  | 1.57649  | 0.71183  |
| C | -0.51696 | 1.29327  | 1.57318  |
| H | -1.22726 | 2.12162  | 1.47368  |
| H | -0.19583 | 1.28428  | 2.61937  |
| C | -1.31046 | -0.00602 | 1.32347  |
| H | -2.10652 | -0.00143 | 2.07849  |
| C | -0.53412 | -1.31471 | 1.57647  |
| H | -0.22466 | -1.31647 | 2.62621  |
| H | -1.24940 | -2.13661 | 1.46278  |
| C | 0.67602  | -1.59143 | 0.72528  |
| C | 1.89014  | -1.94501 | 1.24392  |
| H | 2.16503  | -2.02953 | 2.28501  |
| C | 1.90462  | -1.92172 | -1.22240 |
| H | 2.19164  | -1.98787 | -2.26153 |
| C | 0.68434  | -1.57754 | -0.71180 |
| C | -0.51816 | -1.29477 | -1.57241 |
| H | -1.22886 | -2.12257 | -1.47126 |
| H | -0.19808 | -1.28710 | -2.61893 |
| C | -4.28777 | 0.70505  | 0.28242  |
| H | -4.99148 | 1.38481  | -0.19875 |
| H | -4.45872 | 0.70218  | 1.36599  |
| C | -4.28818 | -0.70275 | -0.28297 |
| H | -4.99289 | -1.38186 | 0.19764  |
| H | -4.45827 | -0.69973 | -1.36669 |

**BhandH/TZVP**

|   |          |         |          |
|---|----------|---------|----------|
| S | 1.45020  | 9.07210 | 9.07190  |
| S | 1.31350  | 5.76300 | 6.56550  |
| O | -3.19440 | 6.13860 | 11.61220 |
| O | -3.31400 | 4.39030 | 10.21640 |
| C | -2.59590 | 5.57030 | 10.47480 |
| C | -2.81460 | 6.53450 | 9.32960  |
| H | -3.90550 | 6.61010 | 9.29210  |
| C | -2.32540 | 7.93730 | 9.62420  |
| H | -2.77710 | 8.61170 | 8.89570  |
| H | -2.72580 | 8.22070 | 10.59980 |
| C | -0.85820 | 8.14480 | 9.60670  |
| C | -0.24420 | 9.09180 | 8.87120  |
| H | -0.70640 | 9.79620 | 8.20050  |
| C | 1.33510  | 7.77180 | 10.17110 |
| H | 2.22270  | 7.35530 | 10.61650 |
| C | 0.06230  | 7.37570 | 10.36900 |
| C | -0.32910 | 6.30950 | 11.32630 |
| H | -0.87280 | 6.76680 | 12.15610 |
| H | 0.58040  | 5.88340 | 11.75210 |
| C | -1.18100 | 5.16170 | 10.82140 |
| H | -1.33100 | 4.50990 | 11.68730 |
| C | -0.53380 | 4.28680 | 9.76800  |
| H | 0.33680  | 3.80710 | 10.21700 |
| H | -1.24090 | 3.48890 | 9.53200  |
| C | -0.10490 | 4.95990 | 8.51940  |
| C | 1.14060  | 4.87620 | 8.01300  |

|   |          |         |          |
|---|----------|---------|----------|
| H | 1.97930  | 4.34650 | 8.43220  |
| C | -0.32020 | 6.25150 | 6.63430  |
| H | -0.73010 | 6.88990 | 5.87010  |
| C | -0.96000 | 5.75940 | 7.71350  |
| C | -2.40520 | 5.97280 | 7.98250  |
| H | -2.92730 | 5.02050 | 7.86390  |
| H | -2.80020 | 6.63790 | 7.21330  |
| C | -4.03720 | 5.18730 | 12.18430 |
| H | -4.84050 | 5.69660 | 12.70930 |
| H | -3.49260 | 4.54970 | 12.88660 |
| C | -4.47830 | 4.41050 | 10.98220 |
| H | -4.78000 | 3.38860 | 11.19390 |
| H | -5.28730 | 4.92550 | 10.45620 |

**M06/TZVP**

|   |          |         |          |
|---|----------|---------|----------|
| S | 1.47140  | 9.11770 | 9.05710  |
| S | 1.35490  | 5.74710 | 6.53860  |
| O | -3.22020 | 6.14160 | 11.63870 |
| O | -3.33960 | 4.36430 | 10.22420 |
| C | -2.61220 | 5.56290 | 10.48550 |
| C | -2.82740 | 6.53790 | 9.32730  |
| H | -3.92290 | 6.61590 | 9.27860  |
| C | -2.33700 | 7.95700 | 9.62460  |
| H | -2.78850 | 8.62570 | 8.88350  |
| H | -2.74970 | 8.25090 | 10.59640 |
| C | -0.85890 | 8.17220 | 9.61480  |
| C | -0.24820 | 9.13080 | 8.87140  |
| H | -0.71510 | 9.83910 | 8.20210  |
| C | 1.35620  | 7.79300 | 10.16380 |
| H | 2.25210  | 7.37260 | 10.59800 |
| C | 0.07370  | 7.39580 | 10.37270 |
| C | -0.30620 | 6.30810 | 11.33070 |
| H | -0.82370 | 6.75770 | 12.18670 |
| H | 0.61510  | 5.86760 | 11.72870 |
| C | -1.18020 | 5.15290 | 10.83100 |
| H | -1.32060 | 4.50100 | 11.70500 |
| C | -0.52630 | 4.26510 | 9.76940  |
| H | 0.35110  | 3.79390 | 10.22600 |
| H | -1.22740 | 3.45440 | 9.54120  |
| C | -0.09680 | 4.93570 | 8.50570  |
| C | 1.16100  | 4.84510 | 8.00170  |
| H | 1.99990  | 4.30960 | 8.42270  |
| C | -0.29870 | 6.25010 | 6.61270  |
| H | -0.70020 | 6.90020 | 5.84840  |
| C | -0.95000 | 5.74890 | 7.69470  |
| C | -2.40540 | 5.98420 | 7.96220  |
| H | -2.94750 | 5.04240 | 7.81430  |
| H | -2.78410 | 6.67640 | 7.20160  |
| C | -4.07180 | 5.17550 | 12.21270 |
| H | -4.87920 | 5.68640 | 12.73900 |
| H | -3.52800 | 4.53700 | 12.92330 |
| C | -4.51440 | 4.38950 | 11.00340 |
| H | -4.81650 | 3.36360 | 11.21800 |

H -5.33170 4.90110 10.47550

**M06HF/TZVP**

S 3.10210 1.93790 0.22050  
S 3.10210 -1.93780 -0.22090  
O -2.98860 1.09110 0.31440  
O -2.98840 -1.09130 -0.31360  
C -2.12330 -0.00010 0.00030  
C -1.34040 0.38690 -1.26130  
H -2.12620 0.49460 -2.01250  
C -0.67090 1.77030 -1.15340  
H -0.46320 2.12160 -2.16410  
H -1.38120 2.45820 -0.69590  
C 0.61980 1.75340 -0.38390  
C 1.79990 2.19690 -0.87560  
H 1.97940 2.64130 -1.84030  
C 2.03290 1.22430 1.37080  
H 2.41490 0.86200 2.31080  
C 0.74820 1.19290 0.93830  
C -0.41850 0.73480 1.79040  
H -1.04990 1.60280 1.98650  
H -0.01820 0.39380 2.74610  
C -1.34020 -0.38690 1.26180  
H -2.12590 -0.49460 2.01310  
C -0.67060 -1.77030 1.15380  
H -0.46270 -2.12150 2.16450  
H -1.38090 -2.45820 0.69650  
C 0.61990 -1.75330 0.38400  
C 1.80020 -2.19680 0.87550  
H 1.97980 -2.64130 1.84010  
C 2.03260 -1.22420 -1.37090  
H 2.41450 -0.86190 -2.31100  
C 0.74800 -1.19290 -0.93820  
C -0.41880 -0.73480 -1.79010  
H -1.05020 -1.60280 -1.98610  
H -0.01870 -0.39380 -2.74590  
C -4.30960 0.59740 0.47570  
H -5.00470 1.38310 0.19860  
H -4.47780 0.27870 1.50440  
C -4.30910 -0.59740 -0.47680  
H -5.00470 -1.38300 -0.20060  
H -4.47570 -0.27870 -1.50570

**M062X/TZVP**

S -3.09990 1.99210 -0.16070  
S -3.09990 -1.99190 0.16070  
O 2.98150 1.11970 -0.21210  
O 2.98160 -1.11960 0.21210  
C 2.11800 -0.00000 -0.00000  
C 1.33440 0.27390 1.28920  
H 2.12540 0.34660 2.04420  
C 0.63390 1.64190 1.29290  
H 0.40470 1.90030 2.32930

|   |          |          |          |
|---|----------|----------|----------|
| H | 1.35030  | 2.38400  | 0.93090  |
| C | -0.63130 | 1.70900  | 0.49400  |
| C | -1.82690 | 2.11010  | 0.99800  |
| H | -2.03660 | 2.44370  | 2.00250  |
| C | -1.99680 | 1.39940  | -1.34940 |
| H | -2.35120 | 1.15180  | -2.33800 |
| C | -0.72420 | 1.30400  | -0.88050 |
| C | 0.45410  | 0.90840  | -1.73250 |
| H | 1.11300  | 1.77700  | -1.82800 |
| H | 0.08640  | 0.68250  | -2.73680 |
| C | 1.33430  | -0.27400 | -1.28920 |
| H | 2.12530  | -0.34670 | -2.04420 |
| C | 0.63390  | -1.64200 | -1.29280 |
| H | 0.40470  | -1.90050 | -2.32930 |
| H | 1.35030  | -2.38400 | -0.93080 |
| C | -0.63130 | -1.70910 | -0.49400 |
| C | -1.82690 | -2.11020 | -0.99800 |
| H | -2.03670 | -2.44380 | -2.00240 |
| C | -1.99670 | -1.39950 | 1.34940  |
| H | -2.35120 | -1.15200 | 2.33810  |
| C | -0.72420 | -1.30400 | 0.88050  |
| C | 0.45420  | -0.90850 | 1.73240  |
| H | 1.11310  | -1.77710 | 1.82790  |
| H | 0.08650  | -0.68270 | 2.73680  |
| C | 4.29530  | 0.63220  | -0.41990 |
| H | 5.00190  | 1.39030  | -0.08750 |
| H | 4.46650  | 0.40470  | -1.47730 |
| C | 4.29530  | -0.63200 | 0.41990  |
| H | 5.00200  | -1.39010 | 0.08750  |
| H | 4.46640  | -0.40450 | 1.47730  |

**B97D/TZVP**

|   |          |          |          |
|---|----------|----------|----------|
| S | 3.10530  | 2.12370  | -0.00340 |
| S | 3.10530  | -2.12350 | 0.00330  |
| O | -2.99660 | 1.15810  | -0.00640 |
| O | -2.99680 | -1.15800 | 0.00680  |
| C | -2.12120 | 0.00000  | 0.00010  |
| C | -1.33320 | 0.02340  | -1.32420 |
| H | -2.12720 | 0.02190  | -2.08520 |
| C | -0.54740 | 1.33320  | -1.56340 |
| H | -0.24530 | 1.34300  | -2.61940 |
| H | -1.25360 | 2.16420  | -1.42900 |
| C | 0.67360  | 1.56930  | -0.71410 |
| C | 1.90310  | 1.87700  | -1.23780 |
| H | 2.17270  | 1.95750  | -2.28470 |
| C | 1.92720  | 1.80750  | 1.23830  |
| H | 2.21700  | 1.83220  | 2.28260  |
| C | 0.68700  | 1.52960  | 0.72310  |
| C | -0.52230 | 1.26770  | 1.58340  |
| H | -1.22250 | 2.10920  | 1.48520  |
| H | -0.20290 | 1.24250  | 2.63400  |
| C | -1.33310 | -0.02360 | 1.32440  |
| H | -2.12710 | -0.02210 | 2.08540  |



|   |          |          |          |
|---|----------|----------|----------|
| C | -0.54740 | -1.33350 | 1.56340  |
| H | -0.24540 | -1.34350 | 2.61940  |
| H | -1.25370 | -2.16440 | 1.42880  |
| C | 0.67370  | -1.56950 | 0.71410  |
| C | 1.90320  | -1.87700 | 1.23780  |
| H | 2.17280  | -1.95750 | 2.28470  |
| C | 1.92710  | -1.80740 | -1.23840 |
| H | 2.21690  | -1.83210 | -2.28270 |
| C | 0.68690  | -1.52970 | -0.72310 |
| C | -0.52260 | -1.26800 | -1.58320 |
| H | -1.22270 | -2.10940 | -1.48470 |
| H | -0.20340 | -1.24290 | -2.63380 |
| C | -4.31670 | 0.69990  | 0.30150  |
| H | -5.03360 | 1.38940  | -0.15800 |
| H | -4.47920 | 0.66050  | 1.39170  |
| C | -4.31670 | -0.69950 | -0.30180 |
| H | -5.03400 | -1.38890 | 0.15730  |
| H | -4.47870 | -0.66000 | -1.39210 |

**TPSS-D/TZVP**

|   |          |         |          |
|---|----------|---------|----------|
| S | 1.54932  | 9.08619 | 9.09559  |
| S | 1.32369  | 5.79078 | 6.46849  |
| O | -3.24426 | 6.15690 | 11.65356 |
| O | -3.35230 | 4.33823 | 10.22020 |
| C | -2.61663 | 5.56428 | 10.48434 |
| C | -2.84375 | 6.54410 | 9.31751  |
| H | -3.93813 | 6.64222 | 9.28938  |
| C | -2.31319 | 7.97067 | 9.59928  |
| H | -2.74467 | 8.63960 | 8.84521  |
| H | -2.72423 | 8.28119 | 10.56840 |
| C | -0.81790 | 8.15612 | 9.60543  |
| C | -0.17316 | 9.09918 | 8.84852  |
| H | -0.61040 | 9.79475 | 8.14410  |
| C | 1.39444  | 7.78745 | 10.24333 |
| H | 2.27830  | 7.37917 | 10.71584 |
| C | 0.09335  | 7.39335 | 10.41701 |
| C | -0.32256 | 6.31811 | 11.38837 |
| H | -0.89328 | 6.77584 | 12.20689 |
| H | 0.57996  | 5.88557 | 11.83627 |
| C | -1.17824 | 5.14733 | 10.84611 |
| H | -1.32537 | 4.47321 | 11.70168 |
| C | -0.49603 | 4.28217 | 9.75910  |
| H | 0.39604  | 3.82916 | 10.20774 |
| H | -1.18364 | 3.45946 | 9.52488  |
| C | -0.09151 | 4.97603 | 8.48415  |
| C | 1.17508  | 4.91448 | 7.96448  |
| H | 2.03895  | 4.41548 | 8.38394  |
| C | -0.35439 | 6.24442 | 6.54530  |
| H | -0.77981 | 6.86472 | 5.76721  |
| C | -0.98165 | 5.74899 | 7.65872  |
| C | -2.44820 | 5.95573 | 7.94118  |
| H | -2.97047 | 4.99497 | 7.84488  |
| H | -2.86077 | 6.61769 | 7.17055  |

|   |          |         |          |
|---|----------|---------|----------|
| C | -4.09248 | 5.15490 | 12.24009 |
| H | -4.89425 | 5.67129 | 12.77315 |
| H | -3.52722 | 4.51996 | 12.93764 |
| C | -4.54728 | 4.37090 | 11.01907 |
| H | -4.83639 | 3.33753 | 11.22488 |
| H | -5.35995 | 4.88888 | 10.48954 |

**B3LYP-D/TZVP**

|   |          |         |          |
|---|----------|---------|----------|
| S | 1.54793  | 9.09019 | 9.11450  |
| S | 1.30892  | 5.77975 | 6.45864  |
| O | -3.23561 | 6.14758 | 11.64833 |
| O | -3.35063 | 4.35168 | 10.22204 |
| C | -2.61683 | 5.56377 | 10.48566 |
| C | -2.83575 | 6.54400 | 9.31904  |
| H | -3.92609 | 6.64609 | 9.29050  |
| C | -2.30500 | 7.96602 | 9.59748  |
| H | -2.73231 | 8.63003 | 8.84128  |
| H | -2.72039 | 8.28454 | 10.55799 |
| C | -0.81379 | 8.15874 | 9.61273  |
| C | -0.17172 | 9.09928 | 8.86324  |
| H | -0.61210 | 9.79004 | 8.16074  |
| C | 1.39005  | 7.79091 | 10.25792 |
| H | 2.26721  | 7.37936 | 10.73305 |
| C | 0.09570  | 7.39665 | 10.42570 |
| C | -0.32116 | 6.31473 | 11.38427 |
| H | -0.88220 | 6.76652 | 12.20779 |
| H | 0.57893  | 5.87892 | 11.82611 |
| C | -1.17650 | 5.15085 | 10.83961 |
| H | -1.31965 | 4.47646 | 11.69092 |
| C | -0.49515 | 4.28999 | 9.75511  |
| H | 0.39676  | 3.84332 | 10.20267 |
| H | -1.17274 | 3.46249 | 9.52582  |
| C | -0.09521 | 4.97281 | 8.47642  |
| C | 1.16328  | 4.90965 | 7.95592  |
| H | 2.02289  | 4.41263 | 8.37859  |
| C | -0.36686 | 6.23275 | 6.54067  |
| H | -0.79824 | 6.85053 | 5.76813  |
| C | -0.98723 | 5.74322 | 7.65178  |
| C | -2.44723 | 5.95839 | 7.94459  |
| H | -2.97422 | 5.00517 | 7.84206  |
| H | -2.85855 | 6.62251 | 7.17965  |
| C | -4.09485 | 5.17036 | 12.23096 |
| H | -4.90623 | 5.68804 | 12.74222 |
| H | -3.54991 | 4.54563 | 12.94893 |
| C | -4.53273 | 4.36499 | 11.01896 |
| H | -4.80858 | 3.33445 | 11.24198 |
| H | -5.35720 | 4.85797 | 10.48998 |

**UFF**

|   |          |          |          |
|---|----------|----------|----------|
| S | 3.21200  | -1.90800 | 0.02700  |
| S | 3.21100  | 1.90900  | -0.03000 |
| O | -3.01800 | -1.16100 | 0.02400  |
| O | -3.01800 | 1.16100  | -0.01700 |

|   |          |          |          |
|---|----------|----------|----------|
| C | -2.20500 | 0.00000  | 0.00300  |
| C | -1.35900 | 0.02100  | 1.30700  |
| H | -2.12300 | 0.03300  | 2.11800  |
| C | -0.56200 | -1.28200 | 1.57800  |
| H | -0.25800 | -1.28300 | 2.64900  |
| H | -1.22500 | -2.16400 | 1.45100  |
| C | 0.65500  | -1.48200 | 0.71600  |
| C | 1.91500  | -1.67900 | 1.25400  |
| H | 2.11200  | -1.69200 | 2.31700  |
| C | 1.91200  | -1.71800 | -1.20300 |
| H | 2.10600  | -1.76600 | -2.26700 |
| C | 0.65300  | -1.50400 | -0.66900 |
| C | -0.56600 | -1.33300 | -1.53500 |
| H | -1.22900 | -2.20900 | -1.37800 |
| H | -0.26400 | -1.36700 | -2.60500 |
| C | -1.36100 | -0.02100 | -1.30300 |
| H | -2.12600 | -0.03300 | -2.11300 |
| C | -0.56500 | 1.28200  | -1.57600 |
| H | -0.26200 | 1.28200  | -2.64700 |
| H | -1.22800 | 2.16400  | -1.44900 |
| C | 0.65300  | 1.48200  | -0.71500 |
| C | 1.91200  | 1.67900  | -1.25500 |
| H | 2.10700  | 1.69200  | -2.31900 |
| C | 1.91300  | 1.71800  | 1.20200  |
| H | 2.10900  | 1.76500  | 2.26500  |
| C | 0.65400  | 1.50400  | 0.67000  |
| C | -0.56400 | 1.33200  | 1.53700  |
| H | -1.22700 | 2.20900  | 1.38200  |
| H | -0.26000 | 1.36600  | 2.60700  |
| C | -4.32800 | -0.73000 | -0.15700 |
| H | -5.00900 | -1.28200 | 0.52600  |
| H | -4.63100 | -0.91000 | -1.21200 |
| C | -4.33000 | 0.73000  | 0.14900  |
| H | -5.00300 | 1.28200  | -0.54100 |
| H | -4.64400 | 0.91000  | 1.20000  |

### MM3

|   |          |          |          |
|---|----------|----------|----------|
| S | 3.21200  | -1.90800 | 0.02700  |
| S | 3.21100  | 1.90900  | -0.03000 |
| O | -3.01800 | -1.16100 | 0.02400  |
| O | -3.01800 | 1.16100  | -0.01700 |
| C | -2.20500 | 0.00000  | 0.00300  |
| C | -1.35900 | 0.02100  | 1.30700  |
| H | -2.12300 | 0.03300  | 2.11800  |
| C | -0.56200 | -1.28200 | 1.57800  |
| H | -0.25800 | -1.28300 | 2.64900  |
| H | -1.22500 | -2.16400 | 1.45100  |
| C | 0.65500  | -1.48200 | 0.71600  |
| C | 1.91500  | -1.67900 | 1.25400  |
| H | 2.11200  | -1.69200 | 2.31700  |
| C | 1.91200  | -1.71800 | -1.20300 |
| H | 2.10600  | -1.76600 | -2.26700 |

|   |          |          |          |
|---|----------|----------|----------|
| C | 0.65300  | -1.50400 | -0.66900 |
| C | -0.56600 | -1.33300 | -1.53500 |
| H | -1.22900 | -2.20900 | -1.37800 |
| H | -0.26400 | -1.36700 | -2.60500 |
| C | -1.36100 | -0.02100 | -1.30300 |
| H | -2.12600 | -0.03300 | -2.11300 |
| C | -0.56500 | 1.28200  | -1.57600 |
| H | -0.26200 | 1.28200  | -2.64700 |
| H | -1.22800 | 2.16400  | -1.44900 |
| C | 0.65300  | 1.48200  | -0.71500 |
| C | 1.91200  | 1.67900  | -1.25500 |
| H | 2.10700  | 1.69200  | -2.31900 |
| C | 1.91300  | 1.71800  | 1.20200  |
| H | 2.10900  | 1.76500  | 2.26500  |
| C | 0.65400  | 1.50400  | 0.67000  |
| C | -0.56400 | 1.33200  | 1.53700  |
| H | -1.22700 | 2.20900  | 1.38200  |
| H | -0.26000 | 1.36600  | 2.60700  |
| C | -4.32800 | -0.73000 | -0.15700 |
| H | -5.00900 | -1.28200 | 0.52600  |
| H | -4.63100 | -0.91000 | -1.21200 |
| C | -4.33000 | 0.73000  | 0.14900  |
| H | -5.00300 | 1.28200  | -0.54100 |
| H | -4.64400 | 0.91000  | 1.20000  |

#### AMBER94

|   |          |           |          |
|---|----------|-----------|----------|
| S | 1.60010  | 8.91980   | 8.82010  |
| S | 1.28860  | 5.84770   | 6.43330  |
| O | -3.20090 | 6.17290   | 11.66160 |
| O | -3.36750 | 4.35970   | 10.27690 |
| C | -2.61810 | 5.56460   | 10.49840 |
| C | -2.85420 | 6.51280   | 9.30240  |
| H | -3.93660 | 6.64870   | 9.27040  |
| C | -2.30640 | 7.9377    | 9.49760  |
| H | -2.72610 | 8.56240   | 8.70880  |
| H | -2.66640 | 8.33140   | 10.44820 |
| C | -0.80350 | 8.09470   | 9.47430  |
| C | -0.11710 | 8.96810   | 8.62870  |
| H | -0.61100 | 9.61310   | 7.91770  |
| C | 1.44360  | 7.7178000 | 10.05240 |
| H | 2.29110  | 7.28800   | 10.56480 |
| C | 0.12290  | 7.35260   | 10.31920 |
| C | -0.28390 | 6.31610   | 11.34100 |
| H | -0.80060 | 6.83210   | 12.15030 |
| H | 0.62190  | 5.87890   | 11.76160 |
| C | -1.16570 | 5.16120   | 10.83490 |
| H | -1.25840 | 4.49930   | 11.69750 |
| C | -0.48080 | 4.28830   | 9.76840  |
| H | 0.43030  | 3.88380   | 10.21000 |
| H | -1.12710 | 3.44370   | 9.52940  |
| C | -0.11380 | 4.96860   | 8.46970  |
| C | 1.17040  | 4.97750   | 7.92220  |
| H | 2.01440  | 4.48920   | 8.38570  |

|   |          |         |          |
|---|----------|---------|----------|
| C | -0.39690 | 6.22490 | 6.50320  |
| H | -0.89990 | 6.80880 | 5.74730  |
| C | -1.04390 | 5.70900 | 7.62750  |
| C | -2.51120 | 5.90640 | 7.93050  |
| H | -3.00370 | 4.93870 | 7.83430  |
| H | -2.93140 | 6.56120 | 7.16680  |
| C | -4.02400 | 5.20780 | 12.27130 |
| H | -4.83470 | 5.66330 | 12.84020 |
| H | -3.42690 | 4.55590 | 12.91020 |
| C | -4.52870 | 4.43700 | 11.06820 |
| H | -4.90550 | 3.45020 | 11.33780 |
| H | -5.29730 | 5.01210 | 10.55030 |

### OPLS\_2001

|   |          |         |          |
|---|----------|---------|----------|
| S | 1.61420  | 9.01900 | 8.89870  |
| S | 1.28130  | 5.75060 | 6.35520  |
| O | -3.19050 | 6.17040 | 11.63910 |
| O | -3.35370 | 4.37870 | 10.27380 |
| C | -2.64340 | 5.55510 | 10.51310 |
| C | -2.83240 | 6.50770 | 9.30720  |
| H | -3.91230 | 6.65210 | 9.26420  |
| C | -2.29370 | 7.94230 | 9.52630  |
| H | -2.71250 | 8.59240 | 8.75800  |
| H | -2.66930 | 8.33540 | 10.47120 |
| C | -0.78730 | 8.12720 | 9.53100  |
| C | -0.12710 | 9.03880 | 8.69440  |
| H | -0.57610 | 9.70110 | 7.96940  |
| C | 1.44080  | 7.77820 | 10.12540 |
| H | 2.31730  | 7.37450 | 10.60980 |
| C | 0.10600  | 7.40900 | 10.34620 |
| C | -0.30180 | 6.33980 | 11.34290 |
| H | -0.81750 | 6.84200 | 12.16160 |
| H | 0.60410  | 5.92480 | 11.78480 |
| C | -1.17290 | 5.17500 | 10.81450 |
| H | -1.25290 | 4.51160 | 11.67610 |
| C | -0.50390 | 4.28040 | 9.74280  |
| H | 0.40230  | 3.84780 | 10.16700 |
| H | -1.14970 | 3.43140 | 9.51800  |
| C | -0.14200 | 4.93100 | 8.42040  |
| C | 1.15130  | 4.89330 | 7.87910  |
| H | 2.02280  | 4.42010 | 8.30620  |
| C | -0.42280 | 6.15140 | 6.45280  |
| H | -0.88190 | 6.74220 | 5.67430  |
| C | -1.03880 | 5.64770 | 7.60770  |
| C | -2.50300 | 5.87950 | 7.93180  |
| H | -3.01060 | 4.91960 | 7.83540  |
| H | -2.92770 | 6.50960 | 7.15020  |
| C | -4.02090 | 5.21960 | 12.26720 |
| H | -4.82370 | 5.68470 | 12.83960 |
| H | -3.42800 | 4.59170 | 12.93380 |
| C | -4.51660 | 4.42770 | 11.07000 |
| H | -4.88220 | 3.43450 | 11.33090 |
| H | -5.30400 | 4.96810 | 10.54270 |

### MMFFs

|   |           |          |          |
|---|-----------|----------|----------|
| S | 1.54450   | 9.05400  | 9.00570  |
| S | 1.19620   | 5.64860  | 6.35380  |
| O | -3.17190  | 6.20640  | 11.65750 |
| O | -3.34130  | 4.35040  | 10.24100 |
| C | -2.59840  | 5.57330  | 10.48410 |
| C | -2.82560  | 6.52240  | 9.29070  |
| H | -3.91890  | 6.66280  | 9.25540  |
| C | -2.29750  | 7.95230  | 9.50120  |
| H | -2.71080  | 8.58290  | 8.70140  |
| H | -2.70670  | 8.36710  | 10.43170 |
| C | -0.81000  | 8.13250  | 9.53420  |
| C | -0.14100  | 9.06190  | 8.75660  |
| H | -0.56740  | 9.75140  | 8.04110  |
| C | 1.40990   | 7.81460  | 10.16700 |
| H | 2.30260   | 7.44310  | 10.65100 |
| C | 0.10570   | 7.39600  | 10.36690 |
| C | -0.27220  | 6.32270  | 11.34210 |
| H | -0.76710  | 6.80310  | 12.19610 |
| H | 0.64650   | 5.88230  | 11.75460 |
| C | -1.14620  | 5.17300  | 10.81190 |
| H | -1.23570  | 4.50270  | 11.68310 |
| C | -0.47430  | 4.28060  | 9.75350  |
| H | 0.45000   | 3.87900  | 10.19220 |
| H | -1.10130  | 3.40160  | 9.55530  |
| C | -0.14430  | 4.91470  | 8.43620  |
| C | 1.11000   | 4.84700  | 7.85470  |
| H | 1.99300   | 4.362100 | 8.24760  |
| C | -0.44620  | 6.09190  | 6.44810  |
| H | -0.88680  | 6.66600  | 5.64470  |
| C | -1.06320  | 5.64980  | 7.60570  |
| C | -2.50620  | 5.90740  | 7.91730  |
| H | -3.05040  | 4.96150  | 7.79740  |
| H | -2.91910  | 6.57440  | 7.14740  |
| C | -4.02360  | 5.22700  | 12.24820 |
| H | -4.83340  | 5.70410  | 12.80530 |
| H | -3.42280  | 4.61920  | 12.93300 |
| C | -4.49900  | 4.42980  | 11.06980 |
| H | -4.85370  | 3.43100  | 11.33550 |
| H | -5.282500 | 4.95570  | 10.51410 |

### Potential energy surface scans

$r(S-S) = 3.70 \text{ \AA}$

ONIOM(QM/MM) structure

|   |          |          |          |
|---|----------|----------|----------|
| S | -3.17000 | -1.89000 | -0.04000 |
| O | 2.92000  | -1.20000 | -0.03000 |
| O | 3.11000  | 1.08000  | 0.07000  |
| C | 2.14000  | 0.02000  | 0.02000  |
| C | 1.36000  | 0.07000  | -1.31000 |
| H | 2.15000  | 0.04000  | -2.07000 |

|   |          |          |          |
|---|----------|----------|----------|
| C | 0.50000  | -1.19000 | -1.60000 |
| H | 0.17000  | -1.14000 | -2.65000 |
| H | 1.17000  | -2.04000 | -1.54000 |
| C | -0.72000 | -1.45000 | -0.75000 |
| C | -1.96000 | -1.66000 | -1.27000 |
| H | -2.24000 | -1.68000 | -2.31000 |
| C | -1.97000 | -1.70000 | 1.20000  |
| H | -2.26000 | -1.75000 | 2.24000  |
| C | -0.72000 | -1.47000 | 0.70000  |
| C | 0.48000  | -1.24000 | 1.57000  |
| H | 1.16000  | -2.09000 | 1.48000  |
| H | 0.15000  | -1.23000 | 2.61000  |
| C | 1.35000  | 0.03000  | 1.34000  |
| H | 2.14000  | -0.02000 | 2.10000  |
| C | 0.60980  | 1.37070  | 1.59140  |
| C | 0.62260  | 1.41960  | -1.51870 |
| C | 4.28000  | -0.88000 | 0.23000  |
| H | 4.91000  | -1.59000 | -0.31000 |
| H | 4.51000  | -0.94000 | 1.30000  |
| C | 4.38000  | 0.54000  | -0.28000 |
| H | 5.15000  | 1.14000  | 0.21000  |
| H | 4.54000  | 0.57000  | -1.37000 |
| S | -3.18000 | 1.81000  | 0.02000  |
| H | 0.32000  | 1.39000  | 2.66000  |
| H | 1.30000  | 2.21000  | 1.43000  |
| C | -0.60000 | 1.55000  | 0.72000  |
| C | -1.87000 | 1.68000  | 1.26000  |
| H | -2.08000 | 1.67000  | 2.32000  |
| C | -1.86000 | 1.72000  | -1.20000 |
| H | -2.05000 | 1.74000  | -2.27000 |
| C | -0.60000 | 1.57000  | -0.66000 |
| H | 1.32000  | 2.25000  | -1.32000 |
| H | 0.35000  | 1.48000  | -2.59000 |

**QM part**

|   |          |          |          |
|---|----------|----------|----------|
| S | -3.17000 | -1.89000 | -0.04000 |
| O | 2.92000  | -1.20000 | -0.03000 |
| O | 3.11000  | 1.08000  | 0.07000  |
| C | 2.14000  | 0.02000  | 0.02000  |
| C | 1.36000  | 0.07000  | -1.31000 |
| H | 2.15000  | 0.04000  | -2.07000 |
| C | 0.50000  | -1.19000 | -1.60000 |
| H | 0.17000  | -1.14000 | -2.65000 |
| H | 1.17000  | -2.04000 | -1.54000 |
| C | -0.72000 | -1.45000 | -0.75000 |
| C | -1.96000 | -1.66000 | -1.27000 |
| H | -2.24000 | -1.68000 | -2.31000 |
| C | -1.97000 | -1.70000 | 1.20000  |
| H | -2.26000 | -1.75000 | 2.24000  |
| C | -0.72000 | -1.47000 | 0.70000  |
| C | 0.48000  | -1.24000 | 1.57000  |
| H | 1.16000  | -2.09000 | 1.48000  |
| H | 0.15000  | -1.23000 | 2.61000  |

|   |         |          |          |
|---|---------|----------|----------|
| C | 1.35000 | 0.03000  | 1.34000  |
| H | 2.14000 | -0.02000 | 2.10000  |
| H | 0.82000 | 0.99000  | 1.52000  |
| H | 0.83000 | 1.04000  | -1.46000 |
| C | 4.28000 | -0.88000 | 0.23000  |
| H | 4.91000 | -1.59000 | -0.31000 |
| H | 4.51000 | -0.94000 | 1.30000  |
| C | 4.38000 | 0.54000  | -0.28000 |
| H | 5.15000 | 1.14000  | 0.21000  |
| H | 4.54000 | 0.57000  | -1.37000 |

$r(S-S) = 3.75 \text{ \AA}$

**ONIOM(QM/MM) structure**

|   |          |          |          |
|---|----------|----------|----------|
| S | -3.16600 | -1.91400 | -0.04300 |
| S | -3.17500 | 1.83600  | 0.02000  |
| O | 2.91600  | -1.20400 | -0.02600 |
| O | 3.11000  | 1.07700  | 0.06600  |
| C | 2.14000  | 0.01800  | 0.01600  |
| C | 1.36000  | 0.07200  | -1.31300 |
| H | 2.15200  | 0.04300  | -2.06900 |
| C | 0.49300  | -1.18400 | -1.60500 |
| H | 0.16800  | -1.13600 | -2.64700 |
| H | 1.17000  | -2.04100 | -1.54100 |
| C | -0.71700 | -1.45200 | -0.74500 |
| C | -1.95800 | -1.67400 | -1.26800 |
| H | -2.23900 | -1.69600 | -2.30900 |
| C | -1.97000 | -1.71000 | 1.20000  |
| H | -2.26000 | -1.76100 | 2.23800  |
| C | -0.72400 | -1.47200 | 0.69600  |
| C | 0.47700  | -1.23200 | 1.57600  |
| H | 1.15500  | -2.08600 | 1.48800  |
| H | 0.14200  | -1.22000 | 2.61500  |
| C | 1.34800  | 0.03400  | 1.33900  |
| H | 2.13400  | -0.01800 | 2.10100  |
| C | 0.61500  | 1.35900  | 1.58700  |
| H | 0.32000  | 1.39700  | 2.65900  |
| H | 1.30300  | 2.21600  | 1.42600  |
| C | -0.60400 | 1.55200  | 0.72300  |
| C | -1.87300 | 1.69300  | 1.25500  |
| H | -2.07600 | 1.68400  | 2.31700  |
| C | -1.86000 | 1.73000  | -1.20500 |
| H | -2.05200 | 1.75300  | -2.26900 |
| C | -0.59700 | 1.57300  | -0.66400 |
| C | 0.63100  | 1.40600  | -1.52100 |
| H | 1.32000  | 2.25500  | -1.32300 |
| H | 0.34800  | 1.48200  | -2.59400 |
| C | 4.28100  | -0.88400 | 0.23000  |
| H | 4.90700  | -1.59700 | -0.30800 |
| H | 4.50500  | -0.94300 | 1.30100  |
| C | 4.38300  | 0.54200  | -0.28100 |
| H | 5.14900  | 1.14000  | 0.21100  |
| H | 4.54200  | 0.57000  | -1.36600 |



**QM part**

|   |          |          |          |
|---|----------|----------|----------|
| S | -3.16563 | -1.91355 | -0.04272 |
| O | 2.91644  | -1.20440 | -0.02564 |
| O | 3.11027  | 1.07721  | 0.06615  |
| C | 2.13985  | 0.01760  | 0.01619  |
| C | 1.35960  | 0.07239  | -1.31280 |
| H | 2.15182  | 0.04299  | -2.06922 |
| C | 0.49307  | -1.18420 | -1.60500 |
| H | 0.16794  | -1.13625 | -2.64690 |
| H | 1.17032  | -2.04090 | -1.54086 |
| C | -0.71688 | -1.45175 | -0.74538 |
| C | -1.95835 | -1.67447 | -1.26765 |
| H | -2.23856 | -1.69551 | -2.30918 |
| C | -1.97038 | -1.70992 | 1.20002  |
| H | -2.26050 | -1.76118 | 2.23777  |
| C | -0.72403 | -1.47211 | 0.69639  |
| C | 0.47727  | -1.23200 | 1.57570  |
| H | 1.15485  | -2.08638 | 1.48751  |
| H | 0.14231  | -1.22036 | 2.61548  |
| C | 1.34803  | 0.03361  | 1.33916  |
| H | 2.13387  | -0.01840 | 2.10053  |
| H | 0.81755  | 0.99271  | 1.51837  |
| H | 0.83237  | 1.03775  | -1.46362 |
| C | 4.28108  | -0.88446 | 0.22954  |
| H | 4.90702  | -1.59659 | -0.30803 |
| H | 4.50463  | -0.94283 | 1.30116  |
| C | 4.38290  | 0.54196  | -0.28143 |
| H | 5.14939  | 1.13967  | 0.21075  |
| H | 4.54187  | 0.57037  | -1.36576 |

**$r(S-S) = 3.80 \text{ \AA}$**

**ONIOM(QM/MM) structure**

|   |          |          |          |
|---|----------|----------|----------|
| S | -3.16200 | -1.93900 | -0.04200 |
| S | -3.17300 | 1.86000  | 0.01900  |
| O | 2.91300  | -1.20500 | -0.02500 |
| O | 3.11000  | 1.07600  | 0.06500  |
| C | 2.13800  | 0.01800  | 0.01600  |
| C | 1.35800  | 0.07300  | -1.31300 |
| H | 2.15100  | 0.04300  | -2.06900 |
| C | 0.49100  | -1.18300 | -1.60500 |
| H | 0.16400  | -1.13400 | -2.64700 |
| H | 1.16800  | -2.04000 | -1.54300 |
| C | -0.71800 | -1.45300 | -0.74500 |
| C | -1.95700 | -1.68700 | -1.26700 |
| H | -2.23700 | -1.71300 | -2.30800 |
| C | -1.96900 | -1.72100 | 1.20100  |
| H | -2.25900 | -1.77600 | 2.23800  |
| C | -0.72500 | -1.47300 | 0.69700  |
| C | 0.47500  | -1.22900 | 1.57700  |
| H | 1.15300  | -2.08400 | 1.49300  |
| H | 0.13800  | -1.21500 | 2.61700  |
| C | 1.34700  | 0.03600  | 1.33900  |
| H | 2.13300  | -0.01600 | 2.10000  |

|   |          |          |          |
|---|----------|----------|----------|
| C | 0.61500  | 1.36100  | 1.58600  |
| H | 0.32000  | 1.40000  | 2.65800  |
| H | 1.30400  | 2.21800  | 1.42500  |
| C | -0.60400 | 1.55600  | 0.72200  |
| C | -1.87200 | 1.70500  | 1.25400  |
| H | -2.07500 | 1.69900  | 2.31700  |
| C | -1.85900 | 1.74000  | -1.20500 |
| H | -2.05100 | 1.76500  | -2.27000 |
| C | -0.59700 | 1.57600  | -0.66500 |
| C | 0.63100  | 1.40700  | -1.52200 |
| H | 1.32100  | 2.25500  | -1.32500 |
| H | 0.34800  | 1.48300  | -2.59500 |
| C | 4.27800  | -0.88700 | 0.23000  |
| H | 4.90300  | -1.60000 | -0.30700 |
| H | 4.50200  | -0.94500 | 1.30200  |
| C | 4.38200  | 0.53900  | -0.28200 |
| H | 5.14900  | 1.13600  | 0.21100  |
| H | 4.54100  | 0.56700  | -1.36600 |

**QM part**

|   |          |          |          |
|---|----------|----------|----------|
| S | -3.16186 | -1.93928 | -0.04209 |
| O | 2.91339  | -1.20522 | -0.02494 |
| O | 3.11002  | 1.07617  | 0.06546  |
| C | 2.13831  | 0.01779  | 0.01617  |
| C | 1.35818  | 0.07276  | -1.31289 |
| H | 2.15052  | 0.04257  | -2.06916 |
| C | 0.49096  | -1.18289 | -1.60522 |
| H | 0.16432  | -1.13372 | -2.64661 |
| H | 1.16820  | -2.03981 | -1.54327 |
| C | -0.71767 | -1.45342 | -0.74457 |
| C | -1.95709 | -1.68748 | -1.26687 |
| H | -2.23666 | -1.71288 | -2.30848 |
| C | -1.96924 | -1.72135 | 1.20070  |
| H | -2.25883 | -1.77565 | 2.23846  |
| C | -0.72489 | -1.47286 | 0.69717  |
| C | 0.47504  | -1.22875 | 1.57739  |
| H | 1.15252  | -2.08360 | 1.49253  |
| H | 0.13847  | -1.21454 | 2.61665  |
| C | 1.34660  | 0.03556  | 1.33918  |
| H | 2.13256  | -0.01637 | 2.10044  |
| H | 0.81706  | 0.99516  | 1.51780  |
| H | 0.83179  | 1.03836  | -1.46427 |
| C | 4.27839  | -0.88693 | 0.22998  |
| H | 4.90344  | -1.59996 | -0.30745 |
| H | 4.50207  | -0.94525 | 1.30158  |
| C | 4.38208  | 0.53922  | -0.28153 |
| H | 5.14918  | 1.13612  | 0.21067  |
| H | 4.54144  | 0.56703  | -1.36582 |

**$r(S-S) = 3.85 \text{ \AA}$**

**ONIOM(QM/MM) structure**

|   |          |          |          |
|---|----------|----------|----------|
| S | -3.15800 | -1.96500 | -0.04100 |
| S | -3.17000 | 1.88400  | 0.01900  |

|   |          |          |          |
|---|----------|----------|----------|
| O | 2.91000  | -1.20600 | -0.02500 |
| O | 3.11000  | 1.07500  | 0.06500  |
| C | 2.13700  | 0.01800  | 0.01600  |
| C | 1.35700  | 0.07300  | -1.31300 |
| H | 2.14900  | 0.04200  | -2.06900 |
| C | 0.48900  | -1.18100 | -1.60600 |
| H | 0.16000  | -1.13000 | -2.64700 |
| H | 1.16600  | -2.03800 | -1.54600 |
| C | -0.71900 | -1.45500 | -0.74400 |
| C | -1.95600 | -1.70100 | -1.26600 |
| H | -2.23500 | -1.73000 | -2.30800 |
| C | -1.96800 | -1.73300 | 1.20100  |
| H | -2.25700 | -1.79000 | 2.23900  |
| C | -0.72600 | -1.47400 | 0.69800  |
| C | 0.47300  | -1.22500 | 1.57900  |
| H | 1.15000  | -2.08100 | 1.49800  |
| H | 0.13500  | -1.20800 | 2.61800  |
| C | 1.34500  | 0.03700  | 1.33900  |
| H | 2.13100  | -0.01500 | 2.10000  |
| C | 0.61500  | 1.36400  | 1.58500  |
| H | 0.32000  | 1.40400  | 2.65700  |
| H | 1.30500  | 2.22000  | 1.42400  |
| C | -0.60300 | 1.55900  | 0.72100  |
| C | -1.87000 | 1.71600  | 1.25300  |
| H | -2.07300 | 1.71400  | 2.31600  |
| C | -1.85800 | 1.75100  | -1.20600 |
| H | -2.05000 | 1.77800  | -2.27100 |
| C | -0.59600 | 1.57900  | -0.66600 |
| C | 0.63100  | 1.40800  | -1.52300 |
| H | 1.32100  | 2.25500  | -1.32600 |
| H | 0.34700  | 1.48300  | -2.59600 |
| C | 4.27500  | -0.89000 | 0.23100  |
| H | 4.90000  | -1.60400 | -0.30500 |
| H | 4.49800  | -0.94700 | 1.30300  |
| C | 4.38100  | 0.53600  | -0.28200 |
| H | 5.14900  | 1.13200  | 0.21000  |
| H | 4.54100  | 0.56300  | -1.36600 |

**QM part**

|   |          |          |          |
|---|----------|----------|----------|
| S | -3.15795 | -1.96522 | -0.04145 |
| O | 2.90999  | -1.20617 | -0.02462 |
| O | 3.10980  | 1.07507  | 0.06469  |
| C | 2.13661  | 0.01784  | 0.01597  |
| C | 1.35666  | 0.07329  | -1.31309 |
| H | 2.14914  | 0.04233  | -2.06920 |
| C | 0.48853  | -1.18129 | -1.60579 |
| H | 0.16026  | -1.13049 | -2.64660 |
| H | 1.16572  | -2.03847 | -1.54649 |
| C | -0.71858 | -1.45487 | -0.74394 |
| C | -1.95575 | -1.70054 | -1.26611 |
| H | -2.23468 | -1.73016 | -2.30777 |
| C | -1.96788 | -1.73305 | 1.20128  |
| H | -2.25680 | -1.79046 | 2.23904  |

|   |          |          |          |
|---|----------|----------|----------|
| C | -0.72578 | -1.47354 | 0.69786  |
| C | 0.47267  | -1.22549 | 1.57906  |
| H | 1.15000  | -2.08085 | 1.49780  |
| H | 0.13450  | -1.20847 | 2.61776  |
| C | 1.34522  | 0.03745  | 1.33906  |
| H | 2.13138  | -0.01451 | 2.10013  |
| H | 0.81669  | 0.99755  | 1.51719  |
| H | 0.83122  | 1.03921  | -1.46488 |
| C | 4.27538  | -0.88954 | 0.23097  |
| H | 4.89969  | -1.60397 | -0.30543 |
| H | 4.49816  | -0.94725 | 1.30277  |
| C | 4.38117  | 0.53600  | -0.28165 |
| H | 5.14905  | 1.13225  | 0.21011  |
| H | 4.54070  | 0.56263  | -1.36595 |

**$r(S-S) = 3.90 \text{ \AA}$**

**ONIOM(QM/MM) structure**

|   |          |          |          |
|---|----------|----------|----------|
| S | -3.15400 | -1.99100 | -0.04100 |
| S | -3.16800 | 1.90800  | 0.01800  |
| O | 2.90700  | -1.20700 | -0.02400 |
| O | 3.10900  | 1.07400  | 0.06400  |
| C | 2.13500  | 0.01800  | 0.01600  |
| C | 1.35500  | 0.07400  | -1.31300 |
| H | 2.14800  | 0.04200  | -2.06900 |
| C | 0.48600  | -1.18000 | -1.60600 |
| H | 0.15700  | -1.12800 | -2.64600 |
| H | 1.16400  | -2.03700 | -1.54900 |
| C | -0.71900 | -1.45700 | -0.74300 |
| C | -1.95400 | -1.71400 | -1.26500 |
| H | -2.23200 | -1.74800 | -2.30700 |
| C | -1.96700 | -1.74500 | 1.20200  |
| H | -2.25500 | -1.80500 | 2.24000  |
| C | -0.72700 | -1.47400 | 0.69900  |
| C | 0.47000  | -1.22200 | 1.58100  |
| H | 1.14800  | -2.07800 | 1.50300  |
| H | 0.13000  | -1.20300 | 2.61900  |
| C | 1.34400  | 0.03900  | 1.33900  |
| H | 2.13000  | -0.01300 | 2.10000  |
| C | 0.61500  | 1.36600  | 1.58500  |
| H | 0.32000  | 1.40700  | 2.65600  |
| H | 1.30500  | 2.22100  | 1.42200  |
| C | -0.60300 | 1.56300  | 0.72000  |
| C | -1.86900 | 1.72800  | 1.25200  |
| H | -2.07200 | 1.73000  | 2.31500  |
| C | -1.85700 | 1.76100  | -1.20700 |
| H | -2.04900 | 1.79100  | -2.27100 |
| C | -0.59600 | 1.58200  | -0.66600 |
| C | 0.63100  | 1.40900  | -1.52300 |
| H | 1.32200  | 2.25600  | -1.32700 |
| H | 0.34700  | 1.48400  | -2.59700 |
| C | 4.27300  | -0.89200 | 0.23100  |
| H | 4.89600  | -1.60700 | -0.30500 |
| H | 4.49600  | -0.95000 | 1.30300  |

|   |         |         |          |
|---|---------|---------|----------|
| C | 4.38000 | 0.53300 | -0.28200 |
| H | 5.14900 | 1.12900 | 0.20900  |
| H | 4.53900 | 0.55900 | -1.36600 |

**QM part**

|   |          |          |          |
|---|----------|----------|----------|
| S | -3.15376 | -1.99113 | -0.04097 |
| O | 2.90668  | -1.20703 | -0.02383 |
| O | 3.10943  | 1.07401  | 0.06433  |
| C | 2.13489  | 0.01802  | 0.01610  |
| C | 1.35517  | 0.07381  | -1.31304 |
| H | 2.14782  | 0.04210  | -2.06896 |
| C | 0.48632  | -1.17977 | -1.60611 |
| H | 0.15652  | -1.12752 | -2.64639 |
| H | 1.16353  | -2.03715 | -1.54924 |
| C | -0.71940 | -1.45654 | -0.74324 |
| C | -1.95422 | -1.71377 | -1.26544 |
| H | -2.23239 | -1.74766 | -2.30718 |
| C | -1.96656 | -1.74492 | 1.20181  |
| H | -2.25490 | -1.80546 | 2.23956  |
| C | -0.72672 | -1.47443 | 0.69857  |
| C | 0.47022  | -1.22231 | 1.58078  |
| H | 1.14750  | -2.07807 | 1.50300  |
| H | 0.13037  | -1.20267 | 2.61890  |
| C | 1.34360  | 0.03935  | 1.33918  |
| H | 2.12986  | -0.01263 | 2.10015  |
| H | 0.81602  | 0.99994  | 1.51678  |
| H | 0.83065  | 1.04003  | -1.46532 |
| C | 4.27254  | -0.89204 | 0.23119  |
| H | 4.89579  | -1.60747 | -0.30512 |
| H | 4.49559  | -0.94962 | 1.30294  |
| C | 4.38002  | 0.53317  | -0.28204 |
| H | 5.14876  | 1.12865  | 0.20934  |
| H | 4.53941  | 0.55917  | -1.36638 |

**$r(S-S) = 3.95 \text{ \AA}$**

**ONIOM(QM/MM) structure**

|   |          |          |          |
|---|----------|----------|----------|
| S | -3.14900 | -2.01700 | -0.04000 |
| S | -3.16500 | 1.93300  | 0.01800  |
| O | 2.90300  | -1.20800 | -0.02300 |
| O | 3.10900  | 1.07300  | 0.06400  |
| C | 2.13300  | 0.01800  | 0.01600  |
| C | 1.35400  | 0.07400  | -1.31300 |
| H | 2.14600  | 0.04200  | -2.06900 |
| C | 0.48400  | -1.17800 | -1.60700 |
| H | 0.15300  | -1.12500 | -2.64600 |
| H | 1.16100  | -2.03600 | -1.55200 |
| C | -0.72000 | -1.45800 | -0.74300 |
| C | -1.95300 | -1.72700 | -1.26500 |
| H | -2.23000 | -1.76500 | -2.30700 |
| C | -1.96500 | -1.75700 | 1.20200  |
| H | -2.25300 | -1.82100 | 2.24000  |
| C | -0.72800 | -1.47600 | 0.69900  |
| C | 0.46800  | -1.21900 | 1.58200  |

|   |          |          |          |
|---|----------|----------|----------|
| H | 1.14500  | -2.07500 | 1.50800  |
| H | 0.12600  | -1.19700 | 2.62000  |
| C | 1.34200  | 0.04100  | 1.33900  |
| H | 2.12800  | -0.01100 | 2.10000  |
| C | 0.61500  | 1.36900  | 1.58400  |
| H | 0.32000  | 1.41100  | 2.65600  |
| H | 1.30600  | 2.22300  | 1.42100  |
| C | -0.60300 | 1.56700  | 0.71900  |
| C | -1.86800 | 1.74000  | 1.25200  |
| H | -2.07000 | 1.74500  | 2.31500  |
| C | -1.85600 | 1.77200  | -1.20700 |
| H | -2.04700 | 1.80400  | -2.27200 |
| C | -0.59600 | 1.58400  | -0.66700 |
| C | 0.63000  | 1.40900  | -1.52400 |
| H | 1.32300  | 2.25600  | -1.32800 |
| H | 0.34700  | 1.48500  | -2.59700 |
| C | 4.27000  | -0.89400 | 0.23200  |
| H | 4.89200  | -1.61100 | -0.30400 |
| H | 4.49300  | -0.95200 | 1.30400  |
| C | 4.37900  | 0.53100  | -0.28200 |
| H | 5.14800  | 1.12500  | 0.21000  |
| H | 4.53900  | 0.55600  | -1.36600 |

**QM part**

|   |          |          |          |
|---|----------|----------|----------|
| S | -3.14940 | -2.01692 | -0.04037 |
| O | 2.90347  | -1.20781 | -0.02338 |
| O | 3.10883  | 1.07304  | 0.06365  |
| C | 2.13310  | 0.01818  | 0.01599  |
| C | 1.35350  | 0.07427  | -1.31317 |
| H | 2.14627  | 0.04181  | -2.06895 |
| C | 0.48396  | -1.17836 | -1.60653 |
| H | 0.15257  | -1.12471 | -2.64624 |
| H | 1.16123  | -2.03589 | -1.55207 |
| C | -0.72032 | -1.45837 | -0.74258 |
| C | -1.95274 | -1.72714 | -1.26474 |
| H | -2.23019 | -1.76531 | -2.30653 |
| C | -1.96513 | -1.75696 | 1.20237  |
| H | -2.25278 | -1.82069 | 2.24013  |
| C | -0.72766 | -1.47550 | 0.69919  |
| C | 0.46784  | -1.21929 | 1.58231  |
| H | 1.14510  | -2.07542 | 1.50787  |
| H | 0.12637  | -1.19713 | 2.61987  |
| C | 1.34198  | 0.04112  | 1.33912  |
| H | 2.12840  | -0.01089 | 2.09995  |
| H | 0.81540  | 1.00219  | 1.51626  |
| H | 0.82990  | 1.04077  | -1.46590 |
| C | 4.26959  | -0.89437 | 0.23172  |
| H | 4.89211  | -1.61064 | -0.30432 |
| H | 4.49253  | -0.95191 | 1.30351  |
| C | 4.37891  | 0.53059  | -0.28198 |
| H | 5.14815  | 1.12530  | 0.20955  |
| H | 4.53882  | 0.55604  | -1.36625 |

$r(S-S) = 4.00 \text{ \AA}$

**ONIOM(QM/MM) structure**

|   |          |          |          |
|---|----------|----------|----------|
| S | -3.14500 | -2.04300 | -0.04000 |
| S | -3.16200 | 1.95700  | 0.01700  |
| O | 2.90000  | -1.20900 | -0.02300 |
| O | 3.10800  | 1.07200  | 0.06300  |
| C | 2.13100  | 0.01800  | 0.01600  |
| C | 1.35200  | 0.07500  | -1.31300 |
| H | 2.14500  | 0.04200  | -2.06900 |
| C | 0.48200  | -1.17700 | -1.60700 |
| H | 0.14900  | -1.12100 | -2.64600 |
| H | 1.15900  | -2.03400 | -1.55500 |
| C | -0.72100 | -1.46000 | -0.74200 |
| C | -1.95100 | -1.74100 | -1.26400 |
| H | -2.22800 | -1.78300 | -2.30600 |
| C | -1.96400 | -1.76900 | 1.20300  |
| H | -2.25100 | -1.83600 | 2.24100  |
| C | -0.72900 | -1.47700 | 0.70000  |
| C | 0.46500  | -1.21600 | 1.58400  |
| H | 1.14300  | -2.07300 | 1.51300  |
| H | 0.12200  | -1.19100 | 2.62100  |
| C | 1.34000  | 0.04300  | 1.33900  |
| H | 2.12700  | -0.00900 | 2.10000  |
| C | 0.61400  | 1.37100  | 1.58300  |
| H | 0.31900  | 1.41400  | 2.65500  |
| H | 1.30700  | 2.22500  | 1.42000  |
| C | -0.60300 | 1.57100  | 0.71900  |
| C | -1.86700 | 1.75200  | 1.25100  |
| H | -2.06900 | 1.76000  | 2.31400  |
| C | -1.85500 | 1.78200  | -1.20800 |
| H | -2.04600 | 1.81700  | -2.27300 |
| C | -0.59600 | 1.58800  | -0.66800 |
| C | 0.63000  | 1.41100  | -1.52500 |
| H | 1.32300  | 2.25600  | -1.32900 |
| H | 0.34700  | 1.48600  | -2.59800 |
| C | 4.26700  | -0.89700 | 0.23200  |
| H | 4.88800  | -1.61400 | -0.30400 |
| H | 4.49000  | -0.95500 | 1.30300  |
| C | 4.37800  | 0.52800  | -0.28200 |
| H | 5.14800  | 1.12200  | 0.20900  |
| H | 4.53700  | 0.55300  | -1.36700 |

**QM part**

|   |          |          |          |
|---|----------|----------|----------|
| S | -3.14462 | -2.04301 | -0.03996 |
| O | 2.89993  | -1.20858 | -0.02261 |
| O | 3.10831  | 1.07202  | 0.06337  |
| C | 2.13120  | 0.01850  | 0.01616  |
| C | 1.35184  | 0.07501  | -1.31311 |
| H | 2.14483  | 0.04188  | -2.06865 |
| C | 0.48171  | -1.17668 | -1.60697 |
| H | 0.14865  | -1.12144 | -2.64606 |
| H | 1.15912  | -2.03428 | -1.55514 |
| C | -0.72107 | -1.46026 | -0.74193 |

|   |          |          |          |
|---|----------|----------|----------|
| C | -1.95093 | -1.74063 | -1.26411 |
| H | -2.22755 | -1.78288 | -2.30595 |
| C | -1.96354 | -1.76925 | 1.20280  |
| H | -2.25057 | -1.83606 | 2.24053  |
| C | -0.72853 | -1.47670 | 0.69980  |
| C | 0.46532  | -1.21614 | 1.58404  |
| H | 1.14266  | -2.07253 | 1.51321  |
| H | 0.12200  | -1.19135 | 2.62093  |
| C | 1.34017  | 0.04308  | 1.33928  |
| H | 2.12671  | -0.00893 | 2.09999  |
| H | 0.81452  | 1.00464  | 1.51594  |
| H | 0.82917  | 1.04183  | -1.46627 |
| C | 4.26655  | -0.89691 | 0.23176  |
| H | 4.88793  | -1.61407 | -0.30443 |
| H | 4.48996  | -0.95457 | 1.30346  |
| C | 4.37763  | 0.52783  | -0.28230 |
| H | 5.14772  | 1.12162  | 0.20900  |
| H | 4.53746  | 0.55284  | -1.36659 |

$r(S-S) = 4.05 \text{ \AA}$

**ONIOM(QM/MM) structure**

|   |          |          |          |
|---|----------|----------|----------|
| S | -3.14000 | -2.06900 | -0.04000 |
| S | -3.15900 | 1.98000  | 0.01700  |
| O | 2.89600  | -1.20900 | -0.02200 |
| O | 3.10800  | 1.07100  | 0.06300  |
| C | 2.12900  | 0.01900  | 0.01600  |
| C | 1.35000  | 0.07600  | -1.31300 |
| H | 2.14300  | 0.04200  | -2.06800 |
| C | 0.47900  | -1.17500 | -1.60800 |
| H | 0.14400  | -1.11800 | -2.64600 |
| H | 1.15700  | -2.03300 | -1.55900 |
| C | -0.72200 | -1.46200 | -0.74100 |
| C | -1.94900 | -1.75400 | -1.26400 |
| H | -2.22500 | -1.80000 | -2.30500 |
| C | -1.96200 | -1.78200 | 1.20300  |
| H | -2.24800 | -1.85200 | 2.24100  |
| C | -0.73000 | -1.47800 | 0.70000  |
| C | 0.46300  | -1.21300 | 1.58600  |
| H | 1.14000  | -2.07000 | 1.51900  |
| H | 0.11800  | -1.18500 | 2.62200  |
| C | 1.33800  | 0.04500  | 1.33900  |
| H | 2.12500  | -0.00700 | 2.10000  |
| C | 0.61400  | 1.37400  | 1.58300  |
| H | 0.31900  | 1.41800  | 2.65500  |
| H | 1.30700  | 2.22600  | 1.42000  |
| C | -0.60400 | 1.57500  | 0.71800  |
| C | -1.86600 | 1.76400  | 1.25000  |
| H | -2.06700 | 1.77600  | 2.31300  |
| C | -1.85400 | 1.79400  | -1.20900 |
| H | -2.04400 | 1.83100  | -2.27300 |
| C | -0.59700 | 1.59100  | -0.66800 |
| C | 0.62900  | 1.41200  | -1.52500 |
| H | 1.32400  | 2.25700  | -1.33000 |



|   |         |          |          |
|---|---------|----------|----------|
| H | 0.34600 | 1.48700  | -2.59800 |
| C | 4.26300 | -0.89900 | 0.23200  |
| H | 4.88400 | -1.61800 | -0.30300 |
| H | 4.48600 | -0.95700 | 1.30400  |
| C | 4.37600 | 0.52500  | -0.28300 |
| H | 5.14700 | 1.11800  | 0.20800  |
| H | 4.53600 | 0.54900  | -1.36700 |

**QM part**

|   |          |          |          |
|---|----------|----------|----------|
| S | -3.13981 | -2.06914 | -0.03951 |
| O | 2.89622  | -1.20946 | -0.02210 |
| O | 3.10784  | 1.07096  | 0.06300  |
| C | 2.12921  | 0.01866  | 0.01619  |
| C | 1.35012  | 0.07577  | -1.31312 |
| H | 2.14324  | 0.04192  | -2.06849 |
| C | 0.47913  | -1.17488 | -1.60759 |
| H | 0.14441  | -1.11780 | -2.64608 |
| H | 1.15662  | -2.03263 | -1.55867 |
| C | -0.72199 | -1.46201 | -0.74142 |
| C | -1.94911 | -1.75418 | -1.26353 |
| H | -2.22486 | -1.80048 | -2.30545 |
| C | -1.96185 | -1.78166 | 1.20325  |
| H | -2.24811 | -1.85160 | 2.24100  |
| C | -0.72952 | -1.47781 | 0.70042  |
| C | 0.46261  | -1.21297 | 1.58574  |
| H | 1.13995  | -2.06971 | 1.51868  |
| H | 0.11755  | -1.18537 | 2.62201  |
| C | 1.33839  | 0.04497  | 1.33931  |
| H | 2.12505  | -0.00715 | 2.09989  |
| H | 0.81376  | 1.00703  | 1.51556  |
| H | 0.82844  | 1.04294  | -1.46667 |
| C | 4.26333  | -0.89946 | 0.23231  |
| H | 4.88372  | -1.61794 | -0.30325 |
| H | 4.48635  | -0.95666 | 1.30409  |
| C | 4.37629  | 0.52473  | -0.28269 |
| H | 5.14735  | 1.11781  | 0.20795  |
| H | 4.53581  | 0.54876  | -1.36705 |

**$r(S-S) = 4.10 \text{ \AA}$**

**ONIOM(QM/MM) structure**

|   |          |          |          |
|---|----------|----------|----------|
| S | -3.13500 | -2.09500 | -0.03900 |
| S | -3.15600 | 2.00400  | 0.01600  |
| O | 2.89300  | -1.21000 | -0.02100 |
| O | 3.10700  | 1.07000  | 0.06300  |
| C | 2.12700  | 0.01900  | 0.01600  |
| C | 1.34800  | 0.07600  | -1.31300 |
| H | 2.14200  | 0.04200  | -2.06800 |
| C | 0.47700  | -1.17300 | -1.60800 |
| H | 0.14000  | -1.11500 | -2.64600 |
| H | 1.15400  | -2.03100 | -1.56200 |
| C | -0.72300 | -1.46400 | -0.74100 |
| C | -1.94700 | -1.76800 | -1.26300 |
| H | -2.22200 | -1.81800 | -2.30500 |

|   |          |          |          |
|---|----------|----------|----------|
| C | -1.96000 | -1.79400 | 1.20400  |
| H | -2.24600 | -1.86700 | 2.24100  |
| C | -0.73100 | -1.47900 | 0.70100  |
| C | 0.46000  | -1.21000 | 1.58700  |
| H | 1.13700  | -2.06700 | 1.52400  |
| H | 0.11300  | -1.18000 | 2.62300  |
| C | 1.33600  | 0.04700  | 1.33900  |
| H | 2.12300  | -0.00500 | 2.10000  |
| C | 0.61300  | 1.37600  | 1.58200  |
| H | 0.31800  | 1.42100  | 2.65400  |
| H | 1.30800  | 2.22800  | 1.41900  |
| C | -0.60400 | 1.57900  | 0.71800  |
| C | -1.86500 | 1.77600  | 1.25000  |
| H | -2.06600 | 1.79100  | 2.31300  |
| C | -1.85200 | 1.80400  | -1.20900 |
| H | -2.04300 | 1.84400  | -2.27400 |
| C | -0.59700 | 1.59400  | -0.66900 |
| C | 0.62900  | 1.41300  | -1.52600 |
| H | 1.32500  | 2.25700  | -1.33100 |
| H | 0.34600  | 1.48800  | -2.59900 |
| C | 4.26000  | -0.90200 | 0.23200  |
| H | 4.88000  | -1.62100 | -0.30400 |
| H | 4.48400  | -0.95900 | 1.30400  |
| C | 4.37500  | 0.52200  | -0.28300 |
| H | 5.14700  | 1.11500  | 0.20700  |
| H | 4.53400  | 0.54600  | -1.36800 |

**QM part**

|   |          |          |          |
|---|----------|----------|----------|
| S | -3.13472 | -2.09510 | -0.03915 |
| O | 2.89271  | -1.21020 | -0.02128 |
| O | 3.10703  | 1.07003  | 0.06287  |
| C | 2.12719  | 0.01890  | 0.01642  |
| C | 1.34836  | 0.07642  | -1.31298 |
| H | 2.14167  | 0.04188  | -2.06814 |
| C | 0.47675  | -1.17328 | -1.60801 |
| H | 0.14041  | -1.11457 | -2.64590 |
| H | 1.15440  | -2.03110 | -1.56176 |
| C | -0.72284 | -1.46405 | -0.74082 |
| C | -1.94716 | -1.76785 | -1.26297 |
| H | -2.22198 | -1.81822 | -2.30495 |
| C | -1.96018 | -1.79419 | 1.20365  |
| H | -2.24574 | -1.86725 | 2.24138  |
| C | -0.73052 | -1.47919 | 0.70100  |
| C | 0.45991  | -1.20998 | 1.58742  |
| H | 1.13734  | -2.06697 | 1.52397  |
| H | 0.11301  | -1.17978 | 2.62302  |
| C | 1.33642  | 0.04677  | 1.33948  |
| H | 2.12317  | -0.00541 | 2.09998  |
| H | 0.81279  | 1.00932  | 1.51527  |
| H | 0.82766  | 1.04392  | -1.46698 |
| C | 4.26029  | -0.90173 | 0.23226  |
| H | 4.87958  | -1.62102 | -0.30351 |
| H | 4.48389  | -0.95898 | 1.30392  |

|   |         |         |          |
|---|---------|---------|----------|
| C | 4.37472 | 0.52225 | -0.28312 |
| H | 5.14662 | 1.11454 | 0.20715  |
| H | 4.53394 | 0.54587 | -1.36753 |

$r(S-S) = 4.15 \text{ \AA}$

**ONIOM(QM/MM) structure**

|   |          |          |          |
|---|----------|----------|----------|
| S | -3.12900 | -2.12100 | -0.03900 |
| S | -3.15300 | 2.02800  | 0.01600  |
| O | 2.88900  | -1.21100 | -0.02100 |
| O | 3.10600  | 1.06900  | 0.06200  |
| C | 2.12500  | 0.01900  | 0.01600  |
| C | 1.34600  | 0.07700  | -1.31300 |
| H | 2.14000  | 0.04200  | -2.06800 |
| C | 0.47400  | -1.17100 | -1.60900 |
| H | 0.13600  | -1.11100 | -2.64600 |
| H | 1.15200  | -2.02900 | -1.56500 |
| C | -0.72400 | -1.46600 | -0.74000 |
| C | -1.94500 | -1.78200 | -1.26200 |
| H | -2.21900 | -1.83600 | -2.30400 |
| C | -1.95800 | -1.80700 | 1.20400  |
| H | -2.24300 | -1.88300 | 2.24200  |
| C | -0.73100 | -1.48100 | 0.70100  |
| C | 0.45700  | -1.20700 | 1.58900  |
| H | 1.13500  | -2.06400 | 1.52900  |
| H | 0.10900  | -1.17400 | 2.62400  |
| C | 1.33400  | 0.04900  | 1.33900  |
| H | 2.12100  | -0.00300 | 2.10000  |
| C | 0.61200  | 1.37900  | 1.58200  |
| H | 0.31800  | 1.42400  | 2.65400  |
| H | 1.30800  | 2.22900  | 1.41800  |
| C | -0.60400 | 1.58300  | 0.71700  |
| C | -1.86400 | 1.78900  | 1.24900  |
| H | -2.06400 | 1.80700  | 2.31200  |
| C | -1.85200 | 1.81600  | -1.21000 |
| H | -2.04100 | 1.85800  | -2.27400 |
| C | -0.59700 | 1.59800  | -0.66900 |
| C | 0.62800  | 1.41400  | -1.52600 |
| H | 1.32500  | 2.25800  | -1.33200 |
| H | 0.34600  | 1.48900  | -2.60000 |
| C | 4.25700  | -0.90400 | 0.23300  |
| H | 4.87500  | -1.62400 | -0.30300 |
| H | 4.48000  | -0.96100 | 1.30500  |
| C | 4.37300  | 0.51900  | -0.28300 |
| H | 5.14600  | 1.11100  | 0.20700  |
| H | 4.53300  | 0.54200  | -1.36800 |

**QM part**

|   |          |          |          |
|---|----------|----------|----------|
| S | -3.12922 | -2.12140 | -0.03867 |
| O | 2.88891  | -1.21082 | -0.02095 |
| O | 3.10632  | 1.06916  | 0.06236  |
| C | 2.12504  | 0.01931  | 0.01634  |
| C | 1.34638  | 0.07738  | -1.31307 |
| H | 2.13986  | 0.04224  | -2.06804 |

|   |          |          |          |
|---|----------|----------|----------|
| C | 0.47424  | -1.17146 | -1.60871 |
| H | 0.13609  | -1.11098 | -2.64593 |
| H | 1.15216  | -2.02925 | -1.56540 |
| C | -0.72362 | -1.46618 | -0.74032 |
| C | -1.94504 | -1.78175 | -1.26239 |
| H | -2.21896 | -1.83605 | -2.30440 |
| C | -1.95809 | -1.80709 | 1.20405  |
| H | -2.24279 | -1.88326 | 2.24179  |
| C | -0.73132 | -1.48076 | 0.70149  |
| C | 0.45738  | -1.20694 | 1.58899  |
| H | 1.13500  | -2.06407 | 1.52920  |
| H | 0.10865  | -1.17411 | 2.62390  |
| C | 1.33447  | 0.04872  | 1.33944  |
| H | 2.12140  | -0.00349 | 2.09977  |
| H | 0.81178  | 1.01175  | 1.51489  |
| H | 0.82660  | 1.04520  | -1.46743 |
| C | 4.25685  | -0.90413 | 0.23278  |
| H | 4.87527  | -1.62446 | -0.30257 |
| H | 4.48015  | -0.96129 | 1.30452  |
| C | 4.37332  | 0.51949  | -0.28312 |
| H | 5.14595  | 1.11091  | 0.20706  |
| H | 4.53281  | 0.54244  | -1.36752 |

$r(S-S) = 4.20 \text{ \AA}$

**ONIOM(QM/MM) structure**

|   |          |          |          |
|---|----------|----------|----------|
| S | 3.12300  | 2.14800  | -0.03800 |
| S | 3.15000  | -2.05200 | 0.01500  |
| O | -2.88500 | 1.21100  | -0.02000 |
| O | -3.10600 | -1.06800 | 0.06200  |
| C | -2.12300 | -0.02000 | 0.01600  |
| C | -1.34400 | -0.07800 | -1.31300 |
| H | -2.13800 | -0.04300 | -2.06800 |
| C | -0.47200 | 1.17000  | -1.60900 |
| H | -0.13200 | 1.10700  | -2.64600 |
| H | -1.15000 | 2.02700  | -1.56900 |
| C | 0.72400  | 1.46800  | -0.74000 |
| C | 1.94300  | 1.79600  | -1.26200 |
| H | 2.21600  | 1.85400  | -2.30400 |
| C | 1.95600  | 1.82000  | 1.20400  |
| H | 2.24000  | 1.90000  | 2.24200  |
| C | 0.73200  | 1.48200  | 0.70200  |
| C | -0.45500 | 1.20400  | 1.59100  |
| H | -1.13300 | 2.06100  | 1.53500  |
| H | -0.10400 | 1.16800  | 2.62500  |
| C | -1.33200 | -0.05100 | 1.34000  |
| H | -2.12000 | 0.00200  | 2.10000  |
| C | -0.61200 | -1.38200 | 1.58100  |
| H | -0.31700 | -1.42800 | 2.65300  |
| H | -1.30800 | -2.23100 | 1.41700  |
| C | 0.60400  | -1.58700 | 0.71600  |
| C | 1.86300  | -1.80100 | 1.24900  |
| H | 2.06300  | -1.82300 | 2.31200  |
| C | 1.85100  | -1.82700 | -1.21000 |

|   |          |          |          |
|---|----------|----------|----------|
| H | 2.04000  | -1.87200 | -2.27500 |
| C | 0.59700  | -1.60100 | -0.67000 |
| C | -0.62800 | -1.41600 | -1.52700 |
| H | -1.32500 | -2.25900 | -1.33300 |
| H | -0.34500 | -1.49100 | -2.60000 |
| C | -4.25300 | 0.90700  | 0.23300  |
| H | -4.87100 | 1.62800  | -0.30200 |
| H | -4.47700 | 0.96400  | 1.30500  |
| C | -4.37200 | -0.51700 | -0.28300 |
| H | -5.14500 | -1.10700 | 0.20700  |
| H | -4.53200 | -0.53900 | -1.36800 |

**QM part**

|   |          |          |          |
|---|----------|----------|----------|
| S | 3.12344  | 2.14777  | -0.03825 |
| O | -2.88508 | 1.21142  | -0.02044 |
| O | -3.10550 | -1.06830 | 0.06202  |
| C | -2.12285 | -0.01974 | 0.01639  |
| C | -1.34441 | -0.07837 | -1.31311 |
| H | -2.13811 | -0.04267 | -2.06786 |
| C | -0.47172 | 1.16953  | -1.60940 |
| H | -0.13172 | 1.10731  | -2.64591 |
| H | -1.14986 | 2.02731  | -1.56898 |
| C | 0.72444  | 1.46815  | -0.73980 |
| C | 1.94278  | 1.79563  | -1.26185 |
| H | 2.21562  | 1.85411  | -2.30393 |
| C | 1.95595  | 1.82001  | 1.20442  |
| H | 2.23966  | 1.89957  | 2.24219  |
| C | 0.73220  | 1.48218  | 0.70195  |
| C | -0.45473 | 1.20383  | 1.59062  |
| H | -1.13250 | 2.06111  | 1.53450  |
| H | -0.10405 | 1.16841  | 2.62480  |
| C | -1.33244 | -0.05069 | 1.33951  |
| H | -2.11955 | 0.00153  | 2.09967  |
| H | -0.81067 | -1.01416 | 1.51458  |
| H | -0.82552 | -1.04651 | -1.46779 |
| C | -4.25343 | 0.90655  | 0.23298  |
| H | -4.87085 | 1.62773  | -0.30240 |
| H | -4.47691 | 0.96389  | 1.30468  |
| C | -4.37179 | -0.51688 | -0.28319 |
| H | -5.14516 | -1.10733 | 0.20700  |
| H | -4.53151 | -0.53945 | -1.36756 |

**$r(S-S) = 4.25 \text{ \AA}$**

**ONIOM(QM/MM) structure**

|   |          |          |          |
|---|----------|----------|----------|
| S | 3.11800  | 2.17400  | -0.03800 |
| S | 3.14700  | -2.07600 | 0.01500  |
| O | -2.88100 | 1.21200  | -0.02000 |
| O | -3.10400 | -1.06700 | 0.06200  |
| C | -2.12100 | -0.02000 | 0.01600  |
| C | -1.34200 | -0.07900 | -1.31300 |
| H | -2.13600 | -0.04300 | -2.06800 |
| C | -0.46900 | 1.16800  | -1.61000 |
| H | -0.12700 | 1.10400  | -2.64600 |

|   |          |          |          |
|---|----------|----------|----------|
| H | -1.14700 | 2.02600  | -1.57300 |
| C | 0.72500  | 1.47100  | -0.73900 |
| C | 1.94100  | 1.81000  | -1.26100 |
| H | 2.21300  | 1.87200  | -2.30300 |
| C | 1.95400  | 1.83300  | 1.20500  |
| H | 2.23700  | 1.91600  | 2.24300  |
| C | 0.73300  | 1.48400  | 0.70200  |
| C | -0.45200 | 1.20100  | 1.59200  |
| H | -1.13000 | 2.05800  | 1.54000  |
| H | -0.09900 | 1.16300  | 2.62600  |
| C | -1.33000 | -0.05200 | 1.33900  |
| H | -2.11800 | 0.00000  | 2.10000  |
| C | -0.61100 | -1.38400 | 1.58100  |
| H | -0.31600 | -1.43100 | 2.65300  |
| H | -1.30900 | -2.23300 | 1.41700  |
| C | 0.60500  | -1.59100 | 0.71600  |
| C | 1.86200  | -1.81300 | 1.24800  |
| H | 2.06100  | -1.83800 | 2.31100  |
| C | 1.84900  | -1.83900 | -1.21100 |
| H | 2.03800  | -1.88600 | -2.27500 |
| C | 0.59800  | -1.60500 | -0.67000 |
| C | -0.62700 | -1.41700 | -1.52700 |
| H | -1.32600 | -2.25900 | -1.33400 |
| H | -0.34400 | -1.49200 | -2.60100 |
| C | -4.25000 | 0.90900  | 0.23300  |
| H | -4.86700 | 1.63100  | -0.30200 |
| H | -4.47300 | 0.96600  | 1.30500  |
| C | -4.37000 | -0.51400 | -0.28300 |
| H | -5.14400 | -1.10400 | 0.20700  |
| H | -4.53000 | -0.53600 | -1.36800 |

**QM part**

|   |          |          |          |
|---|----------|----------|----------|
| S | 3.11769  | 2.17392  | -0.03784 |
| O | -2.88133 | 1.21204  | -0.02007 |
| O | -3.10447 | -1.06745 | 0.06164  |
| C | -2.12055 | -0.02001 | 0.01638  |
| C | -1.34230 | -0.07919 | -1.31312 |
| H | -2.13614 | -0.04286 | -2.06770 |
| C | -0.46902 | 1.16782  | -1.61009 |
| H | -0.12722 | 1.10369  | -2.64592 |
| H | -1.14746 | 2.02554  | -1.57277 |
| C | 0.72533  | 1.47056  | -0.73935 |
| C | 1.94057  | 1.80966  | -1.26131 |
| H | 2.21251  | 1.87183  | -2.30341 |
| C | 1.95385  | 1.83309  | 1.20476  |
| H | 2.23674  | 1.91557  | 2.24253  |
| C | 0.73314  | 1.48406  | 0.70243  |
| C | -0.45193 | 1.20099  | 1.59216  |
| H | -1.12993 | 2.05837  | 1.53983  |
| H | -0.09941 | 1.16287  | 2.62564  |
| C | -1.33031 | -0.05245 | 1.33949  |
| H | -2.11754 | -0.00010 | 2.09953  |
| H | -0.80958 | -1.01643 | 1.51427  |

|   |          |          |          |
|---|----------|----------|----------|
| H | -0.82444 | -1.04771 | -1.46817 |
| C | -4.25005 | 0.90868  | 0.23340  |
| H | -4.86664 | 1.63083  | -0.30163 |
| H | -4.47331 | 0.96587  | 1.30515  |
| C | -4.37013 | -0.51438 | -0.28330 |
| H | -5.14418 | -1.10411 | 0.20667  |
| H | -4.52989 | -0.53631 | -1.36768 |

**$r(S-S) = 4.30 \text{ \AA}$**

**ONIOM(QM/MM) structure**

|   |          |          |          |
|---|----------|----------|----------|
| S | 3.11000  | 2.20000  | -0.04000 |
| O | -2.88000 | 1.21000  | -0.02000 |
| O | -3.10000 | -1.07000 | 0.06000  |
| C | -2.12000 | -0.02000 | 0.02000  |
| C | -1.34000 | -0.08000 | -1.31000 |
| H | -2.13000 | -0.04000 | -2.07000 |
| C | -0.47000 | 1.17000  | -1.61000 |
| H | -0.12000 | 1.10000  | -2.65000 |
| H | -1.15000 | 2.02000  | -1.58000 |
| C | 0.73000  | 1.47000  | -0.74000 |
| C | 1.94000  | 1.82000  | -1.26000 |
| H | 2.21000  | 1.89000  | -2.30000 |
| C | 1.95000  | 1.85000  | 1.21000  |
| H | 2.23000  | 1.93000  | 2.24000  |
| C | 0.73000  | 1.49000  | 0.70000  |
| C | -0.45000 | 1.20000  | 1.59000  |
| H | -1.13000 | 2.06000  | 1.55000  |
| H | -0.09000 | 1.16000  | 2.63000  |
| C | -1.33000 | -0.05000 | 1.34000  |
| H | -2.12000 | 0.00000  | 2.10000  |
| C | -0.60620 | -1.40010 | 1.57660  |
| C | -0.61530 | -1.43190 | -1.53300 |
| C | -4.25000 | 0.91000  | 0.23000  |
| H | -4.86000 | 1.63000  | -0.30000 |
| H | -4.47000 | 0.97000  | 1.31000  |
| C | -4.37000 | -0.51000 | -0.28000 |
| H | -5.14000 | -1.10000 | 0.21000  |
| H | -4.53000 | -0.53000 | -1.37000 |
| S | 3.14000  | -2.10000 | 0.01000  |
| H | -0.32000 | -1.43000 | 2.65000  |
| H | -1.31000 | -2.23000 | 1.42000  |
| C | 0.61000  | -1.60000 | 0.72000  |
| C | 1.86000  | -1.83000 | 1.25000  |
| H | 2.06000  | -1.85000 | 2.31000  |
| C | 1.85000  | -1.85000 | -1.21000 |
| H | 2.04000  | -1.90000 | -2.28000 |
| C | 0.60000  | -1.61000 | -0.67000 |
| H | -1.33000 | -2.26000 | -1.33000 |
| H | -0.34000 | -1.49000 | -2.60000 |

**QM part**

|   |          |         |          |
|---|----------|---------|----------|
| S | 3.11000  | 2.20000 | -0.04000 |
| O | -2.88000 | 1.21000 | -0.02000 |

|   |          |          |          |
|---|----------|----------|----------|
| O | -3.10000 | -1.07000 | 0.06000  |
| C | -2.12000 | -0.02000 | 0.02000  |
| C | -1.34000 | -0.08000 | -1.31000 |
| H | -2.13000 | -0.04000 | -2.07000 |
| C | -0.47000 | 1.17000  | -1.61000 |
| H | -0.12000 | 1.10000  | -2.65000 |
| H | -1.15000 | 2.02000  | -1.58000 |
| C | 0.73000  | 1.47000  | -0.74000 |
| C | 1.94000  | 1.82000  | -1.26000 |
| H | 2.21000  | 1.89000  | -2.30000 |
| C | 1.95000  | 1.85000  | 1.21000  |
| H | 2.23000  | 1.93000  | 2.24000  |
| C | 0.73000  | 1.49000  | 0.70000  |
| C | -0.45000 | 1.20000  | 1.59000  |
| H | -1.13000 | 2.06000  | 1.55000  |
| H | -0.09000 | 1.16000  | 2.63000  |
| C | -1.33000 | -0.05000 | 1.34000  |
| H | -2.12000 | 0.00000  | 2.10000  |
| H | -0.81000 | -1.02000 | 1.51000  |
| H | -0.82000 | -1.05000 | -1.47000 |
| C | -4.25000 | 0.91000  | 0.23000  |
| H | -4.86000 | 1.63000  | -0.30000 |
| H | -4.47000 | 0.97000  | 1.31000  |
| C | -4.37000 | -0.51000 | -0.28000 |
| H | -5.14000 | -1.10000 | 0.21000  |
| H | -4.53000 | -0.53000 | -1.37000 |

$r(S-S) = 4.35 \text{ \AA}$

**ONIOM(QM/MM) structure**

|   |          |          |          |
|---|----------|----------|----------|
| S | 3.11000  | 2.23000  | -0.04000 |
| O | -2.87000 | 1.21000  | -0.02000 |
| O | -3.10000 | -1.07000 | 0.06000  |
| C | -2.12000 | -0.02000 | 0.02000  |
| C | -1.34000 | -0.08000 | -1.31000 |
| H | -2.13000 | -0.04000 | -2.07000 |
| C | -0.46000 | 1.16000  | -1.61000 |
| H | -0.12000 | 1.10000  | -2.65000 |
| H | -1.14000 | 2.02000  | -1.58000 |
| C | 0.73000  | 1.48000  | -0.74000 |
| C | 1.94000  | 1.84000  | -1.26000 |
| H | 2.21000  | 1.91000  | -2.30000 |
| C | 1.95000  | 1.86000  | 1.21000  |
| H | 2.23000  | 1.95000  | 2.24000  |
| C | 0.73000  | 1.49000  | 0.70000  |
| C | -0.45000 | 1.20000  | 1.60000  |
| H | -1.13000 | 2.05000  | 1.55000  |
| H | -0.09000 | 1.15000  | 2.63000  |
| C | -1.33000 | -0.06000 | 1.34000  |
| H | -2.11000 | 0.00000  | 2.10000  |
| C | -0.60060 | -1.40670 | 1.57850  |
| C | -0.61530 | -1.43190 | -1.53300 |
| C | -4.24000 | 0.91000  | 0.23000  |
| H | -4.86000 | 1.64000  | -0.30000 |



|   |          |          |          |
|---|----------|----------|----------|
| H | -4.47000 | 0.97000  | 1.31000  |
| C | -4.37000 | -0.51000 | -0.28000 |
| H | -5.14000 | -1.10000 | 0.21000  |
| H | -4.53000 | -0.53000 | -1.37000 |
| S | 3.14000  | -2.12000 | 0.01000  |
| H | -0.31000 | -1.44000 | 2.65000  |
| H | -1.31000 | -2.24000 | 1.42000  |
| C | 0.61000  | -1.60000 | 0.71000  |
| C | 1.86000  | -1.84000 | 1.25000  |
| H | 2.06000  | -1.87000 | 2.31000  |
| C | 1.85000  | -1.86000 | -1.21000 |
| H | 2.03000  | -1.91000 | -2.28000 |
| C | 0.60000  | -1.61000 | -0.67000 |
| H | -1.33000 | -2.26000 | -1.34000 |
| H | -0.34000 | -1.49000 | -2.60000 |

**QM part**

|   |          |          |          |
|---|----------|----------|----------|
| S | 3.11000  | 2.23000  | -0.04000 |
| O | -2.87000 | 1.21000  | -0.02000 |
| O | -3.10000 | -1.07000 | 0.06000  |
| C | -2.12000 | -0.02000 | 0.02000  |
| C | -1.34000 | -0.08000 | -1.31000 |
| H | -2.13000 | -0.04000 | -2.07000 |
| C | -0.46000 | 1.16000  | -1.61000 |
| H | -0.12000 | 1.10000  | -2.65000 |
| H | -1.14000 | 2.02000  | -1.58000 |
| C | 0.73000  | 1.48000  | -0.74000 |
| C | 1.94000  | 1.84000  | -1.26000 |
| H | 2.21000  | 1.91000  | -2.30000 |
| C | 1.95000  | 1.86000  | 1.21000  |
| H | 2.23000  | 1.95000  | 2.24000  |
| C | 0.73000  | 1.49000  | 0.70000  |
| C | -0.45000 | 1.20000  | 1.60000  |
| H | -1.13000 | 2.05000  | 1.55000  |
| H | -0.09000 | 1.15000  | 2.63000  |
| C | -1.33000 | -0.06000 | 1.34000  |
| H | -2.11000 | 0.00000  | 2.10000  |
| H | -0.81000 | -1.02000 | 1.51000  |
| H | -0.82000 | -1.05000 | -1.47000 |
| C | -4.24000 | 0.91000  | 0.23000  |
| H | -4.86000 | 1.64000  | -0.30000 |
| H | -4.47000 | 0.97000  | 1.31000  |
| C | -4.37000 | -0.51000 | -0.28000 |
| H | -5.14000 | -1.10000 | 0.21000  |
| H | -4.53000 | -0.53000 | -1.37000 |

**$r(S-S) = 4.40 \text{ \AA}$**

**ONIOM(QM/MM) structure**

|   |          |          |          |
|---|----------|----------|----------|
| S | 3.10000  | 2.25000  | -0.04000 |
| O | -2.87000 | 1.21000  | -0.02000 |
| O | -3.10000 | -1.07000 | 0.06000  |
| C | -2.11000 | -0.02000 | 0.02000  |
| C | -1.34000 | -0.08000 | -1.31000 |

|   |          |          |          |
|---|----------|----------|----------|
| H | -2.13000 | -0.04000 | -2.07000 |
| C | -0.46000 | 1.16000  | -1.61000 |
| H | -0.11000 | 1.09000  | -2.65000 |
| H | -1.14000 | 2.02000  | -1.58000 |
| C | 0.73000  | 1.48000  | -0.74000 |
| C | 1.93000  | 1.85000  | -1.26000 |
| H | 2.20000  | 1.93000  | -2.30000 |
| C | 1.95000  | 1.87000  | 1.21000  |
| H | 2.23000  | 1.97000  | 2.24000  |
| C | 0.74000  | 1.49000  | 0.70000  |
| C | -0.44000 | 1.19000  | 1.60000  |
| H | -1.12000 | 2.05000  | 1.56000  |
| H | -0.09000 | 1.15000  | 2.63000  |
| C | -1.32000 | -0.06000 | 1.34000  |
| H | -2.11000 | -0.01000 | 2.10000  |
| C | -0.60150 | -1.41240 | 1.57950  |
| C | -0.61530 | -1.43190 | -1.53300 |
| C | -4.24000 | 0.91000  | 0.23000  |
| H | -4.85000 | 1.64000  | -0.30000 |
| H | -4.46000 | 0.97000  | 1.31000  |
| C | -4.36000 | -0.51000 | -0.28000 |
| H | -5.14000 | -1.09000 | 0.21000  |
| H | -4.53000 | -0.53000 | -1.37000 |
| S | 3.14000  | -2.15000 | 0.01000  |
| H | -0.31000 | -1.44000 | 2.65000  |
| H | -1.31000 | -2.24000 | 1.42000  |
| C | 0.61000  | -1.60000 | 0.71000  |
| C | 1.86000  | -1.85000 | 1.25000  |
| H | 2.06000  | -1.89000 | 2.31000  |
| C | 1.85000  | -1.87000 | -1.21000 |
| H | 2.03000  | -1.93000 | -2.28000 |
| C | 0.60000  | -1.62000 | -0.67000 |
| H | -1.33000 | -2.26000 | -1.34000 |
| H | -0.34000 | -1.50000 | -2.60000 |

**QM part**

|   |          |          |          |
|---|----------|----------|----------|
| S | 3.10000  | 2.25000  | -0.04000 |
| O | -2.87000 | 1.21000  | -0.02000 |
| O | -3.10000 | -1.07000 | 0.06000  |
| C | -2.11000 | -0.02000 | 0.02000  |
| C | -1.34000 | -0.08000 | -1.31000 |
| H | -2.13000 | -0.04000 | -2.07000 |
| C | -0.46000 | 1.16000  | -1.61000 |
| H | -0.11000 | 1.09000  | -2.65000 |
| H | -1.14000 | 2.02000  | -1.58000 |
| C | 0.73000  | 1.48000  | -0.74000 |
| C | 1.93000  | 1.85000  | -1.26000 |
| H | 2.20000  | 1.93000  | -2.30000 |
| C | 1.95000  | 1.87000  | 1.21000  |
| H | 2.23000  | 1.97000  | 2.24000  |
| C | 0.74000  | 1.49000  | 0.70000  |
| C | -0.44000 | 1.19000  | 1.60000  |
| H | -1.12000 | 2.05000  | 1.56000  |

|   |          |          |          |
|---|----------|----------|----------|
| H | -0.09000 | 1.15000  | 2.63000  |
| C | -1.32000 | -0.06000 | 1.34000  |
| H | -2.11000 | -0.01000 | 2.10000  |
| H | -0.81000 | -1.02000 | 1.51000  |
| H | -0.82000 | -1.05000 | -1.47000 |
| C | -4.24000 | 0.91000  | 0.23000  |
| H | -4.85000 | 1.64000  | -0.30000 |
| H | -4.46000 | 0.97000  | 1.31000  |
| C | -4.36000 | -0.51000 | -0.28000 |
| H | -5.14000 | -1.09000 | 0.21000  |
| H | -4.53000 | -0.53000 | -1.37000 |

**$r(S-S) = 4.45 \text{ \AA}$**

**ONIOM(QM/MM) structure**

|   |         |          |          |
|---|---------|----------|----------|
| S | 0.00000 | 0.00000  | 0.00000  |
| O | 6.05530 | 0.00000  | 0.00000  |
| O | 6.68310 | 2.19500  | 0.00000  |
| C | 5.52480 | 1.34560  | -0.00600 |
| C | 4.76320 | 1.49520  | -1.33970 |
| H | 5.54280 | 1.29740  | -2.09570 |
| C | 3.68680 | 0.41860  | -1.59810 |
| H | 3.35130 | 0.51240  | -2.64090 |
| H | 4.20420 | -0.54680 | -1.54550 |
| C | 2.46190 | 0.34500  | -0.72080 |
| C | 1.21020 | 0.15500  | -1.23030 |
| H | 0.92860 | 0.09690  | -2.26800 |
| C | 1.20490 | 0.22480  | 1.23880  |
| H | 0.91680 | 0.22230  | 2.27050  |
| C | 2.45500 | 0.38810  | 0.71860  |
| C | 3.67250 | 0.50660  | 1.61090  |
| H | 4.18970 | -0.46090 | 1.60350  |
| H | 3.33040 | 0.65600  | 2.63740  |
| C | 4.75860 | 1.57140  | 1.30930  |
| H | 5.52990 | 1.40960  | 2.07300  |
| C | 4.30090 | 2.98840  | 1.48960  |
| C | 4.31480 | 2.90180  | -1.60500 |
| C | 7.45580 | 0.05200  | 0.24370  |
| H | 7.92720 | -0.78280 | -0.25860 |
| H | 7.66710 | 0.00230  | 1.32540  |
| C | 7.82490 | 1.41930  | -0.31640 |
| H | 8.69680 | 1.86940  | 0.15500  |
| H | 7.98060 | 1.36220  | -1.40560 |
| S | 0.74710 | 4.38600  | -0.10820 |
| H | 4.01270 | 3.15380  | 2.56640  |
| H | 5.13430 | 3.72030  | 1.31180  |
| C | 3.13080 | 3.41470  | 0.61880  |
| C | 1.94650 | 3.90060  | 1.14580  |
| H | 1.76020 | 4.01300  | 2.20310  |
| C | 1.95350 | 3.84110  | -1.31370 |
| H | 1.78160 | 3.88410  | -2.38530 |
| C | 3.13790 | 3.37380  | -0.76060 |
| H | 5.14840 | 3.63840  | -1.44710 |
| H | 4.03550 | 3.02110  | -2.68230 |

**QM part**

|   |          |          |          |
|---|----------|----------|----------|
| S | 3.09000  | 2.28000  | -0.04000 |
| O | -2.87000 | 1.21000  | -0.02000 |
| O | -3.10000 | -1.06000 | 0.06000  |
| C | -2.11000 | -0.02000 | 0.02000  |
| C | -1.33000 | -0.08000 | -1.31000 |
| H | -2.13000 | -0.05000 | -2.07000 |
| C | -0.46000 | 1.16000  | -1.61000 |
| H | -0.11000 | 1.09000  | -2.65000 |
| H | -1.14000 | 2.02000  | -1.59000 |
| C | 0.73000  | 1.48000  | -0.74000 |
| C | 1.93000  | 1.87000  | -1.26000 |
| H | 2.20000  | 1.94000  | -2.30000 |
| C | 1.94000  | 1.89000  | 1.21000  |
| H | 2.22000  | 1.98000  | 2.24000  |
| C | 0.74000  | 1.49000  | 0.70000  |
| C | -0.44000 | 1.19000  | 1.60000  |
| H | -1.12000 | 2.05000  | 1.56000  |
| H | -0.08000 | 1.14000  | 2.63000  |
| C | -1.32000 | -0.06000 | 1.34000  |
| H | -2.11000 | -0.01000 | 2.10000  |
| H | -0.80000 | -1.03000 | 1.51000  |
| H | -0.82000 | -1.05000 | -1.47000 |
| C | -4.24000 | 0.92000  | 0.23000  |
| H | -4.85000 | 1.64000  | -0.30000 |
| H | -4.46000 | 0.97000  | 1.31000  |
| C | -4.36000 | -0.51000 | -0.28000 |
| H | -5.14000 | -1.09000 | 0.21000  |
| H | -4.52000 | -0.52000 | -1.37000 |

**Potential energy surface scan with B3LYP functional**

$r(S-S) = 4.45 \text{ \AA}$

**ONIOM(QM/MM) structure**

|   |          |          |          |
|---|----------|----------|----------|
| S | 3.08194  | 2.22539  | -0.01469 |
| S | 3.08210  | -2.22451 | 0.01449  |
| O | -2.97737 | 1.14710  | -0.02362 |
| O | -2.97822 | -1.14646 | 0.02406  |
| C | -2.10532 | -0.00001 | 0.00016  |
| C | -1.31315 | 0.00491  | -1.32204 |
| H | -2.10265 | 0.00069  | -2.08146 |
| C | -0.53414 | 1.31395  | -1.57500 |
| H | -0.22514 | 1.31329  | -2.62366 |
| H | -1.24706 | 2.13683  | -1.46854 |
| C | 0.67706  | 1.59376  | -0.72563 |
| C | 1.89342  | 1.92617  | -1.24473 |
| H | 2.16742  | 2.00061  | -2.28548 |
| C | 1.90810  | 1.90302  | 1.22351  |
| H | 2.19439  | 1.95923  | 2.26209  |
| C | 0.68543  | 1.58024  | 0.71310  |
| C | -0.51802 | 1.29482  | 1.57217  |

|   |          |          |          |
|---|----------|----------|----------|
| H | -1.22597 | 2.12388  | 1.47924  |
| H | -0.19802 | 1.28399  | 2.61748  |
| C | -1.31302 | -0.00550 | 1.32227  |
| H | -2.10246 | -0.00113 | 2.08175  |
| C | -0.53449 | -1.31495 | 1.57483  |
| H | -0.22586 | -1.31498 | 2.62359  |
| H | -1.24761 | -2.13756 | 1.46764  |
| C | 0.67688  | -1.59447 | 0.72566  |
| C | 1.89340  | -1.92637 | 1.24466  |
| H | 2.16752  | -2.00082 | 2.28538  |
| C | 1.90784  | -1.90323 | -1.22362 |
| H | 2.19404  | -1.95944 | -2.26222 |
| C | 0.68512  | -1.58095 | -0.71308 |
| C | -0.51868 | -1.29583 | -1.57173 |
| H | -1.22682 | -2.12462 | -1.47793 |
| H | -0.19925 | -1.28567 | -2.61722 |
| C | -4.30371 | 0.71167  | 0.26691  |
| H | -5.00138 | 1.37838  | -0.23921 |
| H | -4.49748 | 0.73525  | 1.34543  |
| C | -4.30405 | -0.71011 | -0.26737 |
| H | -5.00251 | -1.37633 | 0.23830  |
| H | -4.49713 | -0.73356 | -1.34602 |

**$r(S-S) = 4.50 \text{ \AA}$**

**ONIOM(QM/MM) structure**

|   |          |          |          |
|---|----------|----------|----------|
| S | 3.07704  | 2.25045  | -0.01518 |
| S | 3.07729  | -2.24945 | 0.01498  |
| O | -2.97471 | 1.14709  | -0.02444 |
| O | -2.97564 | -1.14645 | 0.02489  |
| C | -2.10270 | -0.00004 | 0.00017  |
| C | -1.31063 | 0.00392  | -1.32205 |
| H | -2.10033 | -0.00052 | -2.08129 |
| C | -0.53179 | 1.31258  | -1.57651 |
| H | -0.22124 | 1.30972  | -2.62471 |
| H | -1.24555 | 2.13518  | -1.47321 |
| C | 0.67778  | 1.59717  | -0.72631 |
| C | 1.89173  | 1.93871  | -1.24528 |
| H | 2.16521  | 2.01530  | -2.28602 |
| C | 1.90578  | 1.91812  | 1.22290  |
| H | 2.19099  | 1.97859  | 2.26154  |
| C | 0.68581  | 1.58510  | 0.71245  |
| C | -0.51635 | 1.29605  | 1.57216  |
| H | -1.22535 | 2.12441  | 1.48072  |
| H | -0.19536 | 1.28474  | 2.61717  |
| C | -1.31050 | -0.00460 | 1.32229  |
| H | -2.10013 | -0.00001 | 2.08160  |
| C | -0.53212 | -1.31367 | 1.57633  |
| H | -0.22197 | -1.31153 | 2.62465  |
| H | -1.24606 | -2.13600 | 1.47226  |
| C | 0.67764  | -1.59791 | 0.72634  |
| C | 1.89177  | -1.93889 | 1.24520  |
| H | 2.16537  | -2.01549 | 2.28591  |
| C | 1.90556  | -1.91832 | -1.22302 |

|   |          |          |          |
|---|----------|----------|----------|
| H | 2.19069  | -1.97878 | -2.26168 |
| C | 0.68552  | -1.58584 | -0.71243 |
| C | -0.51700 | -1.29714 | -1.57169 |
| H | -1.22618 | -2.12524 | -1.47933 |
| H | -0.19662 | -1.28653 | -2.61688 |
| C | -4.30107 | 0.71191  | 0.26637  |
| H | -4.99870 | 1.37826  | -0.24026 |
| H | -4.49487 | 0.73629  | 1.34487  |
| C | -4.30145 | -0.71027 | -0.26685 |
| H | -4.99993 | -1.37608 | 0.23932  |
| H | -4.49454 | -0.73452 | -1.34548 |

$r(S-S) = 4.55 \text{ \AA}$

**ONIOM(QM/MM) structure**

|   |          |          |          |
|---|----------|----------|----------|
| S | 3.07202  | 2.27547  | -0.01561 |
| S | 3.07231  | -2.27442 | 0.01535  |
| O | -2.97200 | 1.14709  | -0.02510 |
| O | -2.97296 | -1.14644 | 0.02564  |
| C | -2.09999 | -0.00004 | 0.00021  |
| C | -1.30805 | 0.00311  | -1.32204 |
| H | -2.09796 | -0.00152 | -2.08109 |
| C | -0.52943 | 1.31144  | -1.57789 |
| H | -0.21737 | 1.30650  | -2.62564 |
| H | -1.24406 | 2.13370  | -1.47765 |
| C | 0.67851  | 1.60077  | -0.72687 |
| C | 1.88998  | 1.95144  | -1.24574 |
| H | 2.16286  | 2.03027  | -2.28646 |
| C | 1.90349  | 1.93304  | 1.22239  |
| H | 2.18765  | 1.99757  | 2.26107  |
| C | 0.68625  | 1.58994  | 0.71191  |
| C | -0.51456 | 1.29713  | 1.57228  |
| H | -1.22462 | 2.12480  | 1.48247  |
| H | -0.19254 | 1.28523  | 2.61697  |
| C | -1.30788 | -0.00381 | 1.32234  |
| H | -2.09770 | 0.00096  | 2.08147  |
| C | -0.52972 | -1.31256 | 1.57773  |
| H | -0.21805 | -1.30836 | 2.62560  |
| H | -1.24455 | -2.13455 | 1.47671  |
| C | 0.67839  | -1.60153 | 0.72691  |
| C | 1.89006  | -1.95164 | 1.24564  |
| H | 2.16310  | -2.03048 | 2.28633  |
| C | 1.90325  | -1.93325 | -1.22253 |
| H | 2.18729  | -1.99778 | -2.26124 |
| C | 0.68595  | -1.59070 | -0.71189 |
| C | -0.51526 | -1.29826 | -1.57176 |
| H | -1.22549 | -2.12566 | -1.48098 |
| H | -0.19389 | -1.28708 | -2.61665 |
| C | -4.29839 | 0.71209  | 0.26587  |
| H | -4.99597 | 1.37812  | -0.24125 |
| H | -4.49228 | 0.73716  | 1.34433  |
| C | -4.29875 | -0.71042 | -0.26646 |
| H | -4.99727 | -1.37591 | 0.24009  |
| H | -4.49178 | -0.73537 | -1.34508 |

**$r(S-S) = 4.60 \text{ \AA}$**

**ONIOM(QM/MM) structure**

|   |          |          |          |
|---|----------|----------|----------|
| S | 3.06688  | 2.30047  | -0.01583 |
| S | 3.06717  | -2.29943 | 0.01557  |
| O | -2.96923 | 1.14709  | -0.02557 |
| O | -2.97018 | -1.14644 | 0.02613  |
| C | -2.09721 | -0.00003 | 0.00021  |
| C | -1.30537 | 0.00256  | -1.32206 |
| H | -2.09547 | -0.00218 | -2.08093 |
| C | -0.52708 | 1.31069  | -1.57908 |
| H | -0.21357 | 1.30391  | -2.62639 |
| H | -1.24266 | 2.13251  | -1.48171 |
| C | 0.67922  | 1.60468  | -0.72725 |
| C | 1.88810  | 1.96461  | -1.24599 |
| H | 2.16031  | 2.04592  | -2.28671 |
| C | 1.90121  | 1.94773  | 1.22205  |
| H | 2.18435  | 2.01601  | 2.26078  |
| C | 0.68674  | 1.59471  | 0.71156  |
| C | -0.51265 | 1.29792  | 1.57259  |
| H | -1.22376 | 2.12490  | 1.48464  |
| H | -0.18953 | 1.28521  | 2.61694  |
| C | -1.30520 | -0.00326 | 1.32236  |
| H | -2.09521 | 0.00163  | 2.08132  |
| C | -0.52738 | -1.31181 | 1.57892  |
| H | -0.21427 | -1.30578 | 2.62636  |
| H | -1.24315 | -2.13336 | 1.48075  |
| C | 0.67910  | -1.60543 | 0.72729  |
| C | 1.88818  | -1.96479 | 1.24590  |
| H | 2.16055  | -2.04612 | 2.28658  |
| C | 1.90098  | -1.94793 | -1.22219 |
| H | 2.18399  | -2.01622 | -2.26095 |
| C | 0.68644  | -1.59547 | -0.71153 |
| C | -0.51336 | -1.29905 | -1.57206 |
| H | -1.22466 | -2.12576 | -1.48313 |
| H | -0.19090 | -1.28707 | -2.61662 |
| C | -4.29562 | 0.71219  | 0.26556  |
| H | -4.99321 | 1.37800  | -0.24186 |
| H | -4.48954 | 0.73774  | 1.34400  |
| C | -4.29596 | -0.71055 | -0.26616 |
| H | -4.99448 | -1.37582 | 0.24068  |
| H | -4.48900 | -0.73596 | -1.34477 |

**$r(S-S) = 4.65 \text{ \AA}$**

**ONIOM(QM/MM) structure**

|   |          |          |          |
|---|----------|----------|----------|
| S | 3.06156  | 2.32549  | -0.01597 |
| S | 3.06192  | -2.32440 | 0.01568  |
| O | -2.96637 | 1.14708  | -0.02587 |
| O | -2.96733 | -1.14645 | 0.02650  |
| C | -2.09435 | -0.00005 | 0.00023  |
| C | -1.30262 | 0.00215  | -1.32206 |
| H | -2.09291 | -0.00267 | -2.08074 |
| C | -0.52476 | 1.31018  | -1.58013 |

|   |          |          |          |
|---|----------|----------|----------|
| H | -0.20984 | 1.30172  | -2.62702 |
| H | -1.24134 | 2.13148  | -1.48550 |
| C | 0.67989  | 1.60881  | -0.72751 |
| C | 1.88607  | 1.97809  | -1.24614 |
| H | 2.15753  | 2.06202  | -2.28685 |
| C | 1.89893  | 1.96230  | 1.22181  |
| H | 2.18107  | 2.03411  | 2.26058  |
| C | 0.68727  | 1.59946  | 0.71133  |
| C | -0.51062 | 1.29850  | 1.57305  |
| H | -1.22283 | 2.12479  | 1.48713  |
| H | -0.18635 | 1.28484  | 2.61703  |
| C | -1.30243 | -0.00289 | 1.32240  |
| H | -2.09262 | 0.00206  | 2.08117  |
| C | -0.52503 | -1.31133 | 1.57998  |
| H | -0.21050 | -1.30363 | 2.62699  |
| H | -1.24179 | -2.13237 | 1.48455  |
| C | 0.67981  | -1.60957 | 0.72755  |
| C | 1.88622  | -1.97825 | 1.24603  |
| H | 2.15785  | -2.06218 | 2.28670  |
| C | 1.89871  | -1.96248 | -1.22196 |
| H | 2.18072  | -2.03429 | -2.26077 |
| C | 0.68699  | -1.60023 | -0.71129 |
| C | -0.51134 | -1.29966 | -1.57249 |
| H | -1.22372 | -2.12569 | -1.48557 |
| H | -0.18776 | -1.28674 | -2.61669 |
| C | -4.29277 | 0.71227  | 0.26531  |
| H | -4.99033 | 1.37793  | -0.24234 |
| H | -4.48675 | 0.73813  | 1.34374  |
| C | -4.29310 | -0.71063 | -0.26599 |
| H | -4.99165 | -1.37574 | 0.24101  |
| H | -4.48608 | -0.73635 | -1.34460 |

$r(S-S) = 4.70 \text{ \AA}$

ONIOM(QM/MM) structure

|   |          |          |          |
|---|----------|----------|----------|
| S | 3.05611  | 2.35050  | -0.01602 |
| S | 3.05651  | -2.34939 | 0.01572  |
| O | -2.96343 | 1.14708  | -0.02610 |
| O | -2.96439 | -1.14647 | 0.02675  |
| C | -2.09140 | -0.00006 | 0.00024  |
| C | -1.29977 | 0.00187  | -1.32208 |
| H | -2.09026 | -0.00301 | -2.08057 |
| C | -0.52242 | 1.30985  | -1.58110 |
| H | -0.20611 | 1.29983  | -2.62756 |
| H | -1.24006 | 2.13057  | -1.48914 |
| C | 0.68057  | 1.61314  | -0.72768 |
| C | 1.88396  | 1.99181  | -1.24620 |
| H | 2.15462  | 2.07841  | -2.28691 |
| C | 1.89662  | 1.97682  | 1.22165  |
| H | 2.17777  | 2.05197  | 2.26045  |
| C | 0.68784  | 1.60425  | 0.71117  |
| C | -0.50851 | 1.29896  | 1.57360  |
| H | -1.22183 | 2.12455  | 1.48983  |
| H | -0.18305 | 1.28425  | 2.61720  |



|   |          |          |          |
|---|----------|----------|----------|
| C | -1.29957 | -0.00262 | 1.32242  |
| H | -2.08996 | 0.00238  | 2.08101  |
| C | -0.52267 | -1.31101 | 1.58096  |
| H | -0.20675 | -1.30174 | 2.62754  |
| H | -1.24048 | -2.13148 | 1.48819  |
| C | 0.68051  | -1.61388 | 0.72773  |
| C | 1.88414  | -1.99195 | 1.24609  |
| H | 2.15497  | -2.07855 | 2.28675  |
| C | 1.89643  | -1.97697 | -1.22181 |
| H | 2.17746  | -2.05212 | -2.26065 |
| C | 0.68758  | -1.60500 | -0.71114 |
| C | -0.50922 | -1.30012 | -1.57303 |
| H | -1.22270 | -2.12546 | -1.48825 |
| H | -0.18445 | -1.28616 | -2.61685 |
| C | -4.28984 | 0.71231  | 0.26516  |
| H | -4.98739 | 1.37786  | -0.24264 |
| H | -4.48383 | 0.73840  | 1.34358  |
| C | -4.29016 | -0.71070 | -0.26584 |
| H | -4.98871 | -1.37570 | 0.24129  |
| H | -4.48313 | -0.73665 | -1.34446 |

**$r(S-S) = 4.75 \text{ \AA}$**

**ONIOM(QM/MM) structure**

|   |          |          |          |
|---|----------|----------|----------|
| S | 3.05053  | 2.37548  | -0.01601 |
| S | 3.05093  | -2.37441 | 0.01574  |
| O | -2.96043 | 1.14707  | -0.02632 |
| O | -2.96135 | -1.14648 | 0.02690  |
| C | -2.08837 | -0.00006 | 0.00021  |
| C | -1.29682 | 0.00167  | -1.32211 |
| H | -2.08750 | -0.00324 | -2.08042 |
| C | -0.52003 | 1.30967  | -1.58203 |
| H | -0.20231 | 1.29813  | -2.62806 |
| H | -1.23877 | 2.12974  | -1.49271 |
| C | 0.68126  | 1.61763  | -0.72780 |
| C | 1.88179  | 2.00571  | -1.24620 |
| H | 2.15160  | 2.09501  | -2.28690 |
| C | 1.89427  | 1.99134  | 1.22154  |
| H | 2.17444  | 2.06970  | 2.26038  |
| C | 0.68844  | 1.60910  | 0.71106  |
| C | -0.50633 | 1.29938  | 1.57419  |
| H | -1.22078 | 2.12424  | 1.49266  |
| H | -0.17964 | 1.28355  | 2.61740  |
| C | -1.29665 | -0.00240 | 1.32242  |
| H | -2.08723 | 0.00263  | 2.08082  |
| C | -0.52029 | -1.31080 | 1.58187  |
| H | -0.20297 | -1.30001 | 2.62803  |
| H | -1.23920 | -2.13063 | 1.49175  |
| C | 0.68120  | -1.61835 | 0.72784  |
| C | 1.88196  | -2.00583 | 1.24610  |
| H | 2.15193  | -2.09512 | 2.28676  |
| C | 1.89411  | -1.99147 | -1.22169 |
| H | 2.17416  | -2.06983 | -2.26056 |
| C | 0.68819  | -1.60982 | -0.71104 |

|   |          |          |          |
|---|----------|----------|----------|
| C | -0.50701 | -1.30051 | -1.57365 |
| H | -1.22162 | -2.12513 | -1.49114 |
| H | -0.18099 | -1.28541 | -2.61707 |
| C | -4.28681 | 0.71232  | 0.26508  |
| H | -4.98440 | 1.37778  | -0.24279 |
| H | -4.48076 | 0.73859  | 1.34350  |
| C | -4.28713 | -0.71077 | -0.26570 |
| H | -4.98565 | -1.37570 | 0.24158  |
| H | -4.48017 | -0.73690 | -1.34429 |

$r(\text{S-S}) = 4.80 \text{ \AA}$

**ONIOM(QM/MM) structure**

|   |          |          |          |
|---|----------|----------|----------|
| S | 3.04480  | 2.40047  | -0.01599 |
| S | 3.04522  | -2.39942 | 0.01574  |
| O | -2.95733 | 1.14705  | -0.02650 |
| O | -2.95822 | -1.14650 | 0.02703  |
| C | -2.08525 | -0.00006 | 0.00019  |
| C | -1.29379 | 0.00150  | -1.32214 |
| H | -2.08466 | -0.00344 | -2.08027 |
| C | -0.51760 | 1.30953  | -1.58296 |
| H | -0.19845 | 1.29649  | -2.62853 |
| H | -1.23748 | 2.12892  | -1.49630 |
| C | 0.68194  | 1.62226  | -0.72790 |
| C | 1.87952  | 2.01975  | -1.24618 |
| H | 2.14847  | 2.11171  | -2.28688 |
| C | 1.89186  | 2.00594  | 1.22144  |
| H | 2.17103  | 2.08742  | 2.26031  |
| C | 0.68904  | 1.61404  | 0.71098  |
| C | -0.50408 | 1.29977  | 1.57483  |
| H | -1.21969 | 2.12387  | 1.49562  |
| H | -0.17612 | 1.28278  | 2.61762  |
| C | -1.29363 | -0.00221 | 1.32242  |
| H | -2.08442 | 0.00283  | 2.08063  |
| C | -0.51786 | -1.31064 | 1.58278  |
| H | -0.19912 | -1.29833 | 2.62849  |
| H | -1.23791 | -2.12979 | 1.49533  |
| C | 0.68189  | -1.62296 | 0.72794  |
| C | 1.87970  | -2.01985 | 1.24609  |
| H | 2.14879  | -2.11180 | 2.28676  |
| C | 1.89173  | -2.00605 | -1.22158 |
| H | 2.17080  | -2.08752 | -2.26048 |
| C | 0.68881  | -1.61474 | -0.71095 |
| C | -0.50472 | -1.30088 | -1.57431 |
| H | -1.22050 | -2.12475 | -1.49414 |
| H | -0.17742 | -1.28460 | -2.61732 |
| C | -4.28369 | 0.71233  | 0.26501  |
| H | -4.98131 | 1.37771  | -0.24293 |
| H | -4.47759 | 0.73875  | 1.34344  |
| C | -4.28402 | -0.71083 | -0.26556 |
| H | -4.98251 | -1.37570 | 0.24183  |
| H | -4.47710 | -0.73712 | -1.34415 |

$r(\text{S-S}) = 4.85 \text{ \AA}$

**ONIOM(QM/MM) structure**

|   |          |          |          |
|---|----------|----------|----------|
| S | 3.03891  | 2.42549  | -0.01597 |
| S | 3.03937  | -2.42441 | 0.01576  |
| O | -2.95413 | 1.14706  | -0.02670 |
| O | -2.95505 | -1.14651 | 0.02715  |
| C | -2.08204 | -0.00006 | 0.00016  |
| C | -1.29066 | 0.00129  | -1.32218 |
| H | -2.08173 | -0.00367 | -2.08012 |
| C | -0.51508 | 1.30939  | -1.58391 |
| H | -0.19445 | 1.29480  | -2.62902 |
| H | -1.23613 | 2.12806  | -1.50000 |
| C | 0.68264  | 1.62696  | -0.72800 |
| C | 1.87720  | 2.03387  | -1.24616 |
| H | 2.14525  | 2.12844  | -2.28686 |
| C | 1.88938  | 2.02064  | 1.22134  |
| H | 2.16752  | 2.10522  | 2.26025  |
| C | 0.68965  | 1.61907  | 0.71089  |
| C | -0.50175 | 1.30016  | 1.57549  |
| H | -1.21856 | 2.12347  | 1.49871  |
| H | -0.17246 | 1.28193  | 2.61786  |
| C | -1.29052 | -0.00204 | 1.32241  |
| H | -2.08152 | 0.00302  | 2.08043  |
| C | -0.51538 | -1.31054 | 1.58370  |
| H | -0.19520 | -1.29671 | 2.62895  |
| H | -1.23660 | -2.12897 | 1.49894  |
| C | 0.68259  | -1.62767 | 0.72803  |
| C | 1.87738  | -2.03393 | 1.24609  |
| H | 2.14558  | -2.12848 | 2.28675  |
| C | 1.88929  | -2.02072 | -1.22147 |
| H | 2.16736  | -2.10527 | -2.26039 |
| C | 0.68944  | -1.61979 | -0.71087 |
| C | -0.50238 | -1.30131 | -1.57499 |
| H | -1.21936 | -2.12439 | -1.49721 |
| H | -0.17375 | -1.28383 | -2.61756 |
| C | -4.28047 | 0.71238  | 0.26497  |
| H | -4.97812 | 1.37771  | -0.24299 |
| H | -4.47429 | 0.73893  | 1.34342  |
| C | -4.28085 | -0.71085 | -0.26543 |
| H | -4.97934 | -1.37565 | 0.24206  |
| H | -4.47398 | -0.73725 | -1.34401 |

$r(\text{S-S}) = 4.90 \text{ \AA}$

**ONIOM(QM/MM) structure**

|   |          |          |          |
|---|----------|----------|----------|
| S | 3.03285  | 2.45053  | -0.01597 |
| S | 3.03340  | -2.44937 | 0.01574  |
| O | -2.95083 | 1.14705  | -0.02683 |
| O | -2.95179 | -1.14653 | 0.02731  |
| C | -2.07875 | -0.00010 | 0.00017  |
| C | -1.28747 | 0.00109  | -1.32218 |
| H | -2.07874 | -0.00390 | -2.07993 |
| C | -0.51254 | 1.30927  | -1.58485 |
| H | -0.19040 | 1.29313  | -2.62948 |
| H | -1.23481 | 2.12719  | -1.50373 |

|   |          |          |          |
|---|----------|----------|----------|
| C | 0.68332  | 1.63178  | -0.72808 |
| C | 1.87477  | 2.04811  | -1.24613 |
| H | 2.14189  | 2.14527  | -2.28684 |
| C | 1.88682  | 2.03541  | 1.22124  |
| H | 2.16392  | 2.12300  | 2.26018  |
| C | 0.69026  | 1.62419  | 0.71081  |
| C | -0.49935 | 1.30053  | 1.57621  |
| H | -1.21741 | 2.12302  | 1.50192  |
| H | -0.16868 | 1.28103  | 2.61811  |
| C | -1.28732 | -0.00191 | 1.32244  |
| H | -2.07852 | 0.00316  | 2.08026  |
| C | -0.51281 | -1.31048 | 1.58463  |
| H | -0.19112 | -1.29511 | 2.62941  |
| H | -1.23523 | -2.12818 | 1.50265  |
| C | 0.68331  | -1.63251 | 0.72812  |
| C | 1.87503  | -2.04813 | 1.24605  |
| H | 2.14230  | -2.14525 | 2.28672  |
| C | 1.88679  | -2.03544 | -1.22137 |
| H | 2.16382  | -2.12300 | -2.26033 |
| C | 0.69009  | -1.62492 | -0.71079 |
| C | -0.49997 | -1.30174 | -1.57567 |
| H | -1.21817 | -2.12401 | -1.50037 |
| H | -0.16998 | -1.28300 | -2.61781 |
| C | -4.27718 | 0.71242  | 0.26488  |
| H | -4.97482 | 1.37769  | -0.24316 |
| H | -4.47102 | 0.73909  | 1.34332  |
| C | -4.27757 | -0.71088 | -0.26537 |
| H | -4.97609 | -1.37560 | 0.24218  |
| H | -4.47067 | -0.73739 | -1.34395 |

**Potential energy surface scan with B97D functional**

$r(S-S) = 4.00 \text{ \AA}$

**ONIOM(QM/MM) structure**

|   |          |          |          |
|---|----------|----------|----------|
| S | -3.12432 | -2.00002 | 0.00306  |
| S | -3.12422 | 1.99998  | -0.00308 |
| O | 3.00653  | -1.15810 | 0.00306  |
| O | 3.00662  | 1.15789  | -0.00304 |
| C | 2.13101  | 0.00002  | 0.00002  |
| C | 1.34246  | -0.03434 | -1.32398 |
| H | 2.13563  | -0.03675 | -2.08574 |
| C | 0.55755  | -1.34824 | -1.55106 |
| H | 0.26221  | -1.37277 | -2.60866 |
| H | 1.26121  | -2.17815 | -1.39912 |
| C | -0.66990 | -1.56077 | -0.70524 |
| C | -1.90875 | -1.82474 | -1.22975 |
| H | -2.17991 | -1.89826 | -2.27669 |
| C | -1.93664 | -1.72868 | 1.24543  |
| H | -2.23127 | -1.72491 | 2.28855  |
| C | -0.68528 | -1.50605 | 0.73118  |
| C | 0.52797  | -1.25473 | 1.58901  |
| H | 1.22431  | -2.09909 | 1.49001  |

|   |          |          |          |
|---|----------|----------|----------|
| H | 0.21117  | -1.22603 | 2.64026  |
| C | 1.34245  | 0.03439  | 1.32401  |
| H | 2.13561  | 0.03672  | 2.08578  |
| C | 0.55768  | 1.34839  | 1.55105  |
| H | 0.26237  | 1.37302  | 2.60866  |
| H | 1.26141  | 2.17822  | 1.39903  |
| C | -0.66977 | 1.56092  | 0.70524  |
| C | -1.90867 | 1.82472  | 1.22974  |
| H | -2.17985 | 1.89818  | 2.27668  |
| C | -1.93652 | 1.72871  | -1.24544 |
| H | -2.23114 | 1.72493  | -2.28856 |
| C | -0.68514 | 1.50621  | -0.73118 |
| C | 0.52813  | 1.25489  | -1.58898 |
| H | 1.22455  | 2.09918  | -1.48987 |
| H | 0.21139  | 1.22629  | -2.64025 |
| C | 4.32653  | -0.69734 | 0.30732  |
| H | 5.04357  | -1.39047 | -0.14656 |
| H | 4.48906  | -0.64912 | 1.39715  |
| C | 4.32660  | 0.69704  | -0.30735 |
| H | 5.04369  | 1.39011  | 0.14654  |
| H | 4.48907  | 0.64885  | -1.39719 |

$r(S-S) = 4.05 \text{ \AA}$

**ONIOM(QM/MM) structure**

|   |          |          |          |
|---|----------|----------|----------|
| S | -3.12081 | -2.02503 | 0.00096  |
| S | -3.12072 | 2.02497  | -0.00098 |
| O | 3.00475  | -1.15812 | 0.00010  |
| O | 3.00485  | 1.15791  | -0.00005 |
| C | 2.12926  | 0.00001  | 0.00002  |
| C | 1.34081  | -0.03098 | -1.32407 |
| H | 2.13414  | -0.03220 | -2.08569 |
| C | 0.55535  | -1.34364 | -1.55450 |
| H | 0.25855  | -1.36437 | -2.61178 |
| H | 1.25927  | -2.17413 | -1.40673 |
| C | -0.67081 | -1.56125 | -0.70798 |
| C | -1.90803 | -1.83343 | -1.23233 |
| H | -2.17916 | -1.90723 | -2.27928 |
| C | -1.93465 | -1.74565 | 1.24320  |
| H | -2.22817 | -1.74889 | 2.28665  |
| C | -0.68550 | -1.51121 | 0.72867  |
| C | 0.52721  | -1.25878 | 1.58690  |
| H | 1.22425  | -2.10251 | 1.48699  |
| H | 0.21021  | -1.23182 | 2.63815  |
| C | 1.34079  | 0.03103  | 1.32410  |
| H | 2.13411  | 0.03218  | 2.08574  |
| C | 0.55548  | 1.34380  | 1.55448  |
| H | 0.25872  | 1.36464  | 2.61177  |
| H | 1.25947  | 2.17422  | 1.40662  |
| C | -0.67069 | 1.56141  | 0.70798  |
| C | -1.90794 | 1.83344  | 1.23232  |
| H | -2.17910 | 1.90720  | 2.27926  |
| C | -1.93453 | 1.74569  | -1.24322 |
| H | -2.22804 | 1.74893  | -2.28667 |

|   |          |          |          |
|---|----------|----------|----------|
| C | -0.68536 | 1.51137  | -0.72867 |
| C | 0.52738  | 1.25895  | -1.58686 |
| H | 1.22449  | 2.10260  | -1.48682 |
| H | 0.21044  | 1.23210  | -2.63813 |
| C | 4.32476  | -0.69813 | 0.30554  |
| H | 5.04181  | -1.39011 | -0.15009 |
| H | 4.48728  | -0.65267 | 1.39550  |
| C | 4.32483  | 0.69781  | -0.30559 |
| H | 5.04194  | 1.38974  | 0.15002  |
| H | 4.48725  | 0.65238  | -1.39556 |

$r(S-S) = 4.10 \text{ \AA}$

**ONIOM(QM/MM) structure**

|   |          |          |          |
|---|----------|----------|----------|
| S | 3.11710  | -2.05006 | -0.00029 |
| S | 3.11706  | 2.04994  | 0.00023  |
| O | -3.00281 | -1.15812 | 0.00120  |
| O | -3.00297 | 1.15794  | -0.00107 |
| C | -2.12737 | 0.00002  | 0.00005  |
| C | -1.33901 | -0.02959 | 1.32416  |
| H | -2.13250 | -0.03024 | 2.08564  |
| C | -0.55359 | -1.34165 | 1.55631  |
| H | -0.25564 | -1.36018 | 2.61331  |
| H | -1.25803 | -2.17224 | 1.41132  |
| C | 0.67144  | -1.56337 | 0.70914  |
| C | 1.90669  | -1.84493 | 1.23333  |
| H | 2.17734  | -1.92106 | 2.28024  |
| C | 1.93304  | -1.76030 | -1.24234 |
| H | 2.22582  | -1.76845 | -2.28599 |
| C | 0.68596  | -1.51513 | -0.72760 |
| C | -0.52590 | -1.26022 | -1.58634 |
| H | -1.22353 | -2.10359 | -1.48718 |
| H | -0.20824 | -1.23326 | -2.63739 |
| C | -1.33904 | 0.02968  | -1.32409 |
| H | -2.13254 | 0.03027  | -2.08555 |
| C | -0.55376 | 1.34184  | -1.55622 |
| H | -0.25589 | 1.36048  | -2.61325 |
| H | -1.25825 | 2.17236  | -1.41111 |
| C | 0.67132  | 1.56353  | -0.70913 |
| C | 1.90659  | 1.84494  | -1.23335 |
| H | 2.17722  | 1.92105  | -2.28027 |
| C | 1.93300  | 1.76032  | 1.24232  |
| H | 2.22581  | 1.76845  | 2.28596  |
| C | 0.68588  | 1.51530  | 0.72762  |
| C | -0.52598 | 1.26042  | 1.58635  |
| H | -1.22367 | 2.10372  | 1.48710  |
| H | -0.20835 | 1.23356  | 2.63742  |
| C | -4.32280 | -0.69848 | -0.30492 |
| H | -5.03989 | -1.39000 | 0.15134  |
| H | -4.48515 | -0.65417 | -1.39495 |
| C | -4.32298 | 0.69811  | 0.30475  |
| H | -5.04006 | 1.38953  | -0.15167 |
| H | -4.48555 | 0.65381  | 1.39475  |

**$r(S-S) = 4.15 \text{ \AA}$**

**ONIOM(QM/MM) structure**

|   |          |          |          |
|---|----------|----------|----------|
| S | 3.11326  | -2.07504 | -0.00004 |
| S | 3.11322  | 2.07496  | 0.00001  |
| O | -3.00086 | -1.15812 | 0.00174  |
| O | -3.00097 | 1.15798  | -0.00171 |
| C | -2.12540 | 0.00001  | 0.00002  |
| C | -1.33713 | -0.02892 | 1.32417  |
| H | -2.13078 | -0.02919 | 2.08550  |
| C | -0.55202 | -1.34065 | 1.55751  |
| H | -0.25307 | -1.35757 | 2.61427  |
| H | -1.25710 | -2.17112 | 1.41480  |
| C | 0.67196  | -1.56622 | 0.70977  |
| C | 1.90511  | -1.85750 | 1.23381  |
| H | 2.17507  | -1.93665 | 2.28069  |
| C | 1.93159  | -1.77430 | -1.24192 |
| H | 2.22378  | -1.78665 | -2.28571 |
| C | 0.68655  | -1.51879 | -0.72706 |
| C | -0.52430 | -1.26083 | -1.58637 |
| H | -1.22253 | -2.10390 | -1.48862 |
| H | -0.20575 | -1.23324 | -2.63715 |
| C | -1.33715 | 0.02898  | -1.32414 |
| H | -2.13081 | 0.02921  | -2.08546 |
| C | -0.55214 | 1.34080  | -1.55745 |
| H | -0.25327 | 1.35783  | -2.61423 |
| H | -1.25728 | 2.17121  | -1.41461 |
| C | 0.67187  | 1.56634  | -0.70976 |
| C | 1.90502  | 1.85757  | -1.23382 |
| H | 2.17497  | 1.93674  | -2.28070 |
| C | 1.93156  | 1.77427  | 1.24191  |
| H | 2.22377  | 1.78655  | 2.28569  |
| C | 0.68648  | 1.51892  | 0.72707  |
| C | -0.52439 | 1.26097  | 1.58636  |
| H | -1.22266 | 2.10399  | 1.48854  |
| H | -0.20587 | 1.23346  | 2.63715  |
| C | -4.32083 | -0.69857 | -0.30455 |
| H | -5.03794 | -1.38988 | 0.15200  |
| H | -4.48321 | -0.65473 | -1.39461 |
| C | -4.32094 | 0.69830  | 0.30450  |
| H | -5.03807 | 1.38955  | -0.15211 |
| H | -4.48337 | 0.65445  | 1.39454  |

**$r(S-S) = 4.20 \text{ \AA}$**

**ONIOM(QM/MM) structure**

|   |          |          |          |
|---|----------|----------|----------|
| S | 3.10926  | -2.10005 | 0.00118  |
| S | 3.10921  | 2.09995  | -0.00122 |
| O | -2.99872 | -1.15814 | 0.00362  |
| O | -2.99887 | 1.15797  | -0.00355 |
| C | -2.12330 | 0.00000  | 0.00003  |
| C | -1.33513 | -0.02682 | 1.32423  |
| H | -2.12894 | -0.02636 | 2.08540  |
| C | -0.54987 | -1.33777 | 1.55996  |

|   |          |          |          |
|---|----------|----------|----------|
| H | -0.24948 | -1.35172 | 2.61636  |
| H | -1.25555 | -2.16839 | 1.42086  |
| C | 0.67274  | -1.56821 | 0.71146  |
| C | 1.90390  | -1.86841 | 1.23533  |
| H | 2.17352  | -1.94905 | 2.28219  |
| C | 1.92962  | -1.79025 | -1.24056 |
| H | 2.22079  | -1.80819 | -2.28457 |
| C | 0.68690  | -1.52367 | -0.72551 |
| C | -0.52309 | -1.26335 | -1.58533 |
| H | -1.22216 | -2.10581 | -1.48790 |
| H | -0.20396 | -1.23634 | -2.63595 |
| C | -1.33515 | 0.02690  | -1.32418 |
| H | -2.12898 | 0.02639  | -2.08534 |
| C | -0.55004 | 1.33795  | -1.55988 |
| H | -0.24975 | 1.35204  | -2.61630 |
| H | -1.25578 | 2.16850  | -1.42061 |
| C | 0.67262  | 1.56837  | -0.71144 |
| C | 1.90380  | 1.86845  | -1.23534 |
| H | 2.17340  | 1.94908  | -2.28221 |
| C | 1.92957  | 1.79025  | 1.24055  |
| H | 2.22077  | 1.80815  | 2.28455  |
| C | 0.68681  | 1.52383  | 0.72552  |
| C | -0.52319 | 1.26354  | 1.58532  |
| H | -1.22233 | 2.10593  | 1.48778  |
| H | -0.20412 | 1.23664  | 2.63596  |
| C | -4.31870 | -0.69910 | -0.30343 |
| H | -5.03580 | -1.38968 | 0.15424  |
| H | -4.48108 | -0.65704 | -1.39356 |
| C | -4.31884 | 0.69876  | 0.30334  |
| H | -5.03597 | 1.38924  | -0.15443 |
| H | -4.48132 | 0.65669  | 1.39344  |

$r(S-S) = 4.25 \text{ \AA}$

**ONIOM(QM/MM) structure**

|   |          |          |          |
|---|----------|----------|----------|
| S | -3.10511 | 2.12506  | 0.00367  |
| S | -3.10506 | -2.12493 | -0.00370 |
| O | 2.99648  | 1.15815  | 0.00703  |
| O | 2.99667  | -1.15795 | -0.00699 |
| C | 2.12109  | -0.00000 | 0.00002  |
| C | 1.33301  | 0.02296  | 1.32431  |
| H | 2.12701  | 0.02134  | 2.08531  |
| C | 0.54710  | 1.33256  | 1.56387  |
| H | 0.24478  | 1.34199  | 2.61978  |
| H | 1.25326  | 2.16368  | 1.42990  |
| C | -0.67383 | 1.56909  | 0.71444  |
| C | -1.90321 | 1.87712  | 1.23816  |
| H | -2.17294 | 1.95729  | 2.28504  |
| C | -1.92698 | 1.80877  | -1.23802 |
| H | -2.21662 | 1.83416  | -2.28231 |
| C | -0.68694 | 1.53007  | -0.72273 |
| C | 0.52241  | 1.26831  | -1.58297 |
| H | 1.22260  | 2.10973  | -1.48445 |
| H | 0.20310  | 1.24339  | -2.63360 |



|   |          |          |          |
|---|----------|----------|----------|
| C | 1.33303  | -0.02308 | -1.32427 |
| H | 2.12704  | -0.02139 | -2.08527 |
| C | 0.54728  | -1.33280 | -1.56378 |
| H | 0.24507  | -1.34238 | -2.61971 |
| H | 1.25351  | -2.16383 | -1.42963 |
| C | -0.67370 | -1.56928 | -0.71443 |
| C | -1.90311 | -1.87711 | -1.23818 |
| H | -2.17284 | -1.95724 | -2.28506 |
| C | -1.92691 | -1.80880 | 1.23801  |
| H | -2.21658 | -1.83418 | 2.28230  |
| C | -0.68683 | -1.53026 | 0.72274  |
| C | 0.52255  | -1.26854 | 1.58294  |
| H | 1.22281  | -2.10988 | 1.48426  |
| H | 0.20332  | -1.24378 | 2.63359  |
| C | 4.31649  | 0.70003  | -0.30134 |
| H | 5.03357  | 1.38926  | 0.15840  |
| H | 4.47888  | 0.66123  | -1.39159 |
| C | 4.31664  | -0.69962 | 0.30127  |
| H | 5.03378  | -1.38873 | -0.15856 |
| H | 4.47912  | -0.66080 | 1.39149  |

**$r(\text{S-S}) = 4.30 \text{ \AA}$**

**ONIOM(QM/MM) structure**

|   |          |          |          |
|---|----------|----------|----------|
| S | -3.10080 | 2.15010  | 0.00639  |
| S | -3.10075 | -2.14988 | -0.00643 |
| O | 2.99409  | 1.15818  | 0.01071  |
| O | 2.99441  | -1.15788 | -0.01066 |
| C | 2.11877  | 0.00001  | 0.00003  |
| C | 1.33079  | 0.01881  | 1.32439  |
| H | 2.12497  | 0.01601  | 2.08521  |
| C | 0.54407  | 1.32693  | 1.56802  |
| H | 0.23963  | 1.33147  | 2.62336  |
| H | 1.25071  | 2.15857  | 1.43961  |
| C | -0.67502 | 1.56988  | 0.71759  |
| C | -1.90261 | 1.88557  | 1.24116  |
| H | -2.17257 | 1.96485  | 2.28806  |
| C | -1.92410 | 1.82796  | -1.23528 |
| H | -2.21203 | 1.86114  | -2.27983 |
| C | -0.68690 | 1.53686  | -0.71978 |
| C | 0.52180  | 1.27365  | -1.58044 |
| H | 1.22323  | 2.11392  | -1.48069 |
| H | 0.20234  | 1.25102  | -2.63108 |
| C | 1.33081  | -0.01900 | -1.32435 |
| H | 2.12500  | -0.01611 | -2.08516 |
| C | 0.54435  | -1.32732 | -1.56787 |
| H | 0.24010  | -1.33212 | -2.62326 |
| H | 1.25109  | -2.15882 | -1.43915 |
| C | -0.67484 | -1.57018 | -0.71757 |
| C | -1.90248 | -1.88559 | -1.24118 |
| H | -2.17244 | -1.96481 | -2.28809 |
| C | -1.92401 | -1.82799 | 1.23527  |
| H | -2.21198 | -1.86112 | 2.27982  |
| C | -0.68675 | -1.53716 | 0.71980  |

|   |         |          |          |
|---|---------|----------|----------|
| C | 0.52201 | -1.27403 | 1.58037  |
| H | 1.22355 | -2.11418 | 1.48035  |
| H | 0.20270 | -1.25166 | 2.63106  |
| C | 4.31413 | 0.70112  | -0.29912 |
| H | 5.03117 | 1.38891  | 0.16283  |
| H | 4.47652 | 0.66580  | -1.38948 |
| C | 4.31437 | -0.70045 | 0.29902  |
| H | 5.03154 | -1.38804 | -0.16302 |
| H | 4.47687 | -0.66511 | 1.38936  |

$r(S-S) = 4.35 \text{ \AA}$

**ONIOM(QM/MM) structure**

|   |          |          |          |
|---|----------|----------|----------|
| S | 3.09634  | 2.17521  | -0.00860 |
| S | 3.09628  | -2.17475 | 0.00856  |
| O | -2.99153 | 1.15828  | -0.01364 |
| O | -2.99213 | -1.15772 | 0.01379  |
| C | -2.11638 | 0.00002  | 0.00005  |
| C | -1.32851 | 0.01534  | -1.32441 |
| H | -2.12290 | 0.01165  | -2.08503 |
| C | -0.54112 | 1.32216  | -1.57156 |
| H | -0.23462 | 1.32228  | -2.62632 |
| H | -1.24828 | 2.15418  | -1.44832 |
| C | 0.67617  | 1.57120  | -0.72012 |
| C | 1.90179  | 1.89505  | -1.24356 |
| H | 2.17179  | 1.97413  | -2.29047 |
| C | 1.92138  | 1.84617  | 1.23302  |
| H | 2.20773  | 1.88636  | 2.27778  |
| C | 0.68703  | 1.54310  | 0.71739  |
| C | -0.52085 | 1.27794  | 1.57856  |
| H | -1.22345 | 2.11720  | 1.47828  |
| H | -0.20100 | 1.25690  | 2.62912  |
| C | -1.32848 | -0.01571 | 1.32447  |
| H | -2.12284 | -0.01184 | 2.08511  |
| C | -0.54154 | -1.32288 | 1.57137  |
| H | -0.23534 | -1.32351 | 2.62621  |
| H | -1.24889 | -2.15466 | 1.44758  |
| C | 0.67589  | -1.57176 | 0.72012  |
| C | 1.90162  | -1.89514 | 1.24355  |
| H | 2.17167  | -1.97416 | 2.29046  |
| C | 1.92115  | -1.84625 | -1.23307 |
| H | 2.20750  | -1.88634 | -2.27782 |
| C | 0.68671  | -1.54365 | -0.71739 |
| C | -0.52135 | -1.27866 | -1.57833 |
| H | -1.22414 | -2.11769 | -1.47747 |
| H | -0.20184 | -1.25812 | -2.62900 |
| C | -4.31170 | 0.70220  | 0.29711  |
| H | -5.02855 | 1.38881  | -0.16689 |
| H | -4.47436 | 0.66989  | 1.38752  |
| C | -4.31202 | -0.70099 | -0.29723 |
| H | -5.02929 | -1.38723 | 0.16665  |
| H | -4.47444 | -0.66862 | -1.38767 |

$r(S-S) = 4.40 \text{ \AA}$

**ONIOM(QM/MM) structure**

|   |          |          |          |
|---|----------|----------|----------|
| S | -3.09169 | 2.20017  | 0.01061  |
| S | -3.09166 | -2.19978 | -0.01067 |
| O | 2.98908  | 1.15821  | 0.01661  |
| O | 2.98962  | -1.15776 | -0.01653 |
| C | 2.11388  | 0.00002  | 0.00003  |
| C | 1.32609  | 0.01217  | 1.32451  |
| H | 2.12065  | 0.00760  | 2.08497  |
| C | 0.53819  | 1.31786  | 1.57493  |
| H | 0.22971  | 1.31388  | 2.62911  |
| H | 1.24599  | 2.15010  | 1.45659  |
| C | -0.67727 | 1.57290  | 0.72251  |
| C | -1.90091 | 1.90487  | 1.24576  |
| H | -2.17096 | 1.98393  | 2.29267  |
| C | -1.91847 | 1.86435  | -1.23092 |
| H | -2.20316 | 1.91129  | -2.27586 |
| C | -0.68704 | 1.54950  | -0.71513 |
| C | 0.52005  | 1.28222  | -1.57670 |
| H | 1.22391  | 2.12038  | -1.47589 |
| H | 0.19990  | 1.26276  | -2.62721 |
| C | 1.32612  | -0.01251 | -1.32445 |
| H | 2.12069  | -0.00780 | -2.08490 |
| C | 0.53862  | -1.31850 | -1.57469 |
| H | 0.23044  | -1.31497 | -2.62896 |
| H | 1.24656  | -2.15054 | -1.45582 |
| C | -0.67702 | -1.57338 | -0.72249 |
| C | -1.90075 | -1.90488 | -1.24579 |
| H | -2.17081 | -1.98385 | -2.29270 |
| C | -1.91835 | -1.86439 | 1.23092  |
| H | -2.20310 | -1.91125 | 2.27585  |
| C | -0.68682 | -1.54998 | 0.71515  |
| C | 0.52040  | -1.28286 | 1.57656  |
| H | 1.22443  | -2.12083 | 1.47526  |
| H | 0.20051  | -1.26384 | 2.62715  |
| C | 4.30917  | 0.70284  | -0.29555 |
| H | 5.02614  | 1.38832  | 0.16994  |
| H | 4.47157  | 0.67315  | -1.38607 |
| C | 4.30955  | -0.70177 | 0.29541  |
| H | 5.02676  | -1.38691 | -0.17019 |
| H | 4.47211  | -0.67200 | 1.38591  |

$r(\text{S-S}) = 4.45 \text{ \AA}$

**ONIOM(QM/MM) structure**

|   |          |          |          |
|---|----------|----------|----------|
| S | 3.08695  | 2.22538  | -0.01274 |
| S | 3.08689  | -2.22455 | 0.01264  |
| O | -2.98620 | 1.15842  | -0.01930 |
| O | -2.98730 | -1.15742 | 0.01951  |
| C | -2.11136 | 0.00007  | 0.00008  |
| C | -1.32366 | 0.00884  | -1.32449 |
| H | -2.11846 | 0.00359  | -2.08471 |
| C | -0.53496 | 1.31316  | -1.57830 |
| H | -0.22427 | 1.30473  | -2.63183 |
| H | -1.24325 | 2.14577  | -1.46530 |

|   |          |          |          |
|---|----------|----------|----------|
| C | 0.67856  | 1.57438  | -0.72480 |
| C | 1.90005  | 1.91468  | -1.24795 |
| H | 2.17012  | 1.99362  | -2.29487 |
| C | 1.91562  | 1.88253  | 1.22879  |
| H | 2.19866  | 1.93619  | 2.27387  |
| C | 0.68726  | 1.55569  | 0.71293  |
| C | -0.51885 | 1.28611  | 1.57513  |
| H | -1.22391 | 2.12329  | 1.47422  |
| H | -0.19814 | 1.26790  | 2.62549  |
| C | -1.32359 | -0.00954 | 1.32461  |
| H | -2.11834 | -0.00395 | 2.08488  |
| C | -0.53574 | -1.31452 | 1.57794  |
| H | -0.22563 | -1.30707 | 2.63164  |
| H | -1.24438 | -2.14668 | 1.46386  |
| C | 0.67807  | -1.57539 | 0.72481  |
| C | 1.89980  | -1.91474 | 1.24793  |
| H | 2.16999  | -1.99352 | 2.29483  |
| C | 1.91522  | -1.88263 | -1.22888 |
| H | 2.19827  | -1.93613 | -2.27396 |
| C | 0.68669  | -1.55671 | -0.71294 |
| C | -0.51981 | -1.28748 | -1.57464 |
| H | -1.22523 | -2.12420 | -1.47256 |
| H | -0.19979 | -1.27026 | -2.62522 |
| C | -4.30655 | 0.70422  | 0.29351  |
| H | -5.02316 | 1.38861  | -0.17412 |
| H | -4.46940 | 0.67749  | 1.38404  |
| C | -4.30713 | -0.70199 | -0.29371 |
| H | -5.02451 | -1.38570 | 0.17374  |
| H | -4.46965 | -0.67516 | -1.38428 |

**$r(S-S) = 4.50 \text{ \AA}$**

**ONIOM(QM/MM) structure**

|   |          |          |          |
|---|----------|----------|----------|
| S | 3.08196  | 2.25043  | -0.01323 |
| S | 3.08199  | -2.24950 | 0.01296  |
| O | -2.98356 | 1.15841  | -0.01989 |
| O | -2.98466 | -1.15742 | 0.02047  |
| C | -2.10871 | 0.00005  | 0.00022  |
| C | -1.32118 | 0.00795  | -1.32441 |
| H | -2.11621 | 0.00245  | -2.08442 |
| C | -0.53273 | 1.31193  | -1.57971 |
| H | -0.22062 | 1.30137  | -2.63280 |
| H | -1.24192 | 2.14422  | -1.46976 |
| C | 0.67928  | 1.57789  | -0.72543 |
| C | 1.89826  | 1.92763  | -1.24847 |
| H | 2.16765  | 2.00895  | -2.29539 |
| C | 1.91343  | 1.89761  | 1.22822  |
| H | 2.19544  | 1.95547  | 2.27336  |
| C | 0.68777  | 1.56046  | 0.71236  |
| C | -0.51708 | 1.28724  | 1.57522  |
| H | -1.22318 | 2.12376  | 1.47587  |
| H | -0.19536 | 1.26852  | 2.62528  |
| C | -1.32101 | -0.00869 | 1.32472  |
| H | -2.11593 | -0.00287 | 2.08483  |

|   |          |          |          |
|---|----------|----------|----------|
| C | -0.53334 | -1.31330 | 1.57947  |
| H | -0.22172 | -1.30371 | 2.63271  |
| H | -1.24286 | -2.14518 | 1.46852  |
| C | 0.67889  | -1.57890 | 0.72546  |
| C | 1.89816  | -1.92769 | 1.24838  |
| H | 2.16776  | -2.00887 | 2.29526  |
| C | 1.91298  | -1.89775 | -1.22837 |
| H | 2.19490  | -1.95549 | -2.27354 |
| C | 0.68718  | -1.56147 | -0.71233 |
| C | -0.51813 | -1.28863 | -1.57460 |
| H | -1.22456 | -2.12472 | -1.47400 |
| H | -0.19720 | -1.27090 | -2.62491 |
| C | -4.30398 | 0.70437  | 0.29285  |
| H | -5.02049 | 1.38846  | -0.17538 |
| H | -4.46711 | 0.67833  | 1.38335  |
| C | -4.30438 | -0.70220 | -0.29347 |
| H | -5.02190 | -1.38562 | 0.17419  |
| H | -4.46656 | -0.67608 | -1.38411 |

### Optimised structures of (a)

#### B3LYP/TZVP:UFF

|   |          |          |          |
|---|----------|----------|----------|
| S | -3.33520 | -0.00020 | -0.60740 |
| S | 2.98870  | -0.00000 | -1.36620 |
| N | -0.22700 | 2.30440  | 1.96090  |
| N | -0.22680 | -2.30380 | 1.96130  |
| C | -2.29970 | -1.46780 | -1.07800 |
| C | -2.29990 | 1.46740  | -1.07810 |
| C | -1.10630 | 1.73630  | -0.20430 |
| C | -1.25030 | 2.12140  | 1.13340  |
| C | 1.00290  | 2.07910  | 1.49100  |
| C | 1.27600  | 1.70550  | 0.17720  |
| C | 0.18680  | 1.57060  | -0.68140 |
| C | 2.69660  | 1.45720  | -0.26610 |
| C | 2.69670  | -1.45730 | -0.26610 |
| C | 1.27610  | -1.70550 | 0.17740  |
| C | 1.00310  | -2.07860 | 1.49140  |
| C | -1.25010 | -2.12110 | 1.13380  |
| C | -1.10610 | -1.73640 | -0.20400 |
| C | 0.18690  | -1.57090 | -0.68120 |
| H | -2.00360 | -1.36430 | -2.12240 |
| H | -3.02030 | -2.28570 | -1.02310 |
| H | -2.00380 | 1.36390  | -2.12260 |
| H | -3.02050 | 2.28520  | -1.02320 |
| H | -2.24020 | 2.26960  | 1.55430  |
| H | 1.81330  | 2.19990  | 2.20450  |
| H | 0.35260  | 1.27860  | -1.71200 |
| H | 3.35640  | 1.38270  | 0.59920  |
| H | 3.06410  | 2.28700  | -0.87520 |
| H | 3.35660  | -1.38270 | 0.59910  |
| H | 3.06410  | -2.28710 | -0.87520 |
| H | 1.81350  | -2.19900 | 2.20490  |
| H | -2.24000 | -2.26920 | 1.55480  |
| H | 0.35280  | -1.27930 | -1.71190 |

### B3LYP/TZVP

|   |          |          |          |
|---|----------|----------|----------|
| S | -0.44439 | 3.29125  | 0.85841  |
| S | -0.22106 | -3.11102 | 1.08672  |
| N | -1.29079 | 0.33968  | -2.55804 |
| N | 2.62487  | 0.53118  | -1.16418 |
| C | 0.85543  | 2.25699  | 1.68325  |
| C | -1.87805 | 2.12468  | 0.71143  |
| C | -1.70346 | 1.01207  | -0.28552 |
| C | -1.52191 | 1.27916  | -1.64772 |
| C | -1.20546 | -0.92601 | -2.13726 |
| C | -1.37975 | -1.31724 | -0.81251 |
| C | -1.66056 | -0.31523 | 0.11520  |
| C | -1.24097 | -2.76545 | -0.41763 |
| C | 1.48006  | -2.63307 | 0.53958  |
| C | 1.71580  | -1.16601 | 0.28291  |
| C | 2.39255  | -0.74947 | -0.86041 |
| C | 2.14934  | 1.45785  | -0.33965 |
| C | 1.44359  | 1.16462  | 0.83323  |
| C | 1.26122  | -0.17359 | 1.15004  |
| H | 0.44266  | 1.85208  | 2.60870  |
| H | 1.61277  | 2.99442  | 1.95653  |
| H | -2.10742 | 1.72816  | 1.70184  |
| H | -2.69877 | 2.78522  | 0.42457  |
| H | -1.53945 | 2.30413  | -2.00564 |
| H | -0.97607 | -1.66567 | -2.89959 |
| H | -1.77740 | -0.57327 | 1.16176  |
| H | -0.84539 | -3.35103 | -1.24941 |
| H | -2.21265 | -3.19206 | -0.15654 |
| H | 1.74036  | -3.22034 | -0.34272 |
| H | 2.10892  | -2.98905 | 1.35960  |
| H | 2.75987  | -1.48128 | -1.57457 |
| H | 2.30949  | 2.49152  | -0.63108 |
| H | 0.70660  | -0.45326 | 2.03872  |

### TPSS/TZVP

|   |          |          |          |
|---|----------|----------|----------|
| S | -0.42005 | 3.28242  | 0.81926  |
| S | -0.22893 | -3.08864 | 1.07045  |
| N | -1.51713 | 0.33287  | -2.61440 |
| N | 2.81909  | 0.52179  | -1.06633 |
| C | 0.87735  | 2.26155  | 1.68561  |
| C | -1.88531 | 2.13628  | 0.70003  |
| C | -1.75499 | 1.02243  | -0.30693 |
| C | -1.69171 | 1.27977  | -1.68622 |
| C | -1.36900 | -0.93197 | -2.18407 |
| C | -1.42560 | -1.31478 | -0.84054 |
| C | -1.65372 | -0.30663 | 0.10095  |
| C | -1.24484 | -2.76432 | -0.44873 |
| C | 1.49387  | -2.64293 | 0.54091  |
| C | 1.76537  | -1.17416 | 0.30607  |
| C | 2.53531  | -0.76177 | -0.78580 |
| C | 2.29530  | 1.45485  | -0.26402 |
| C | 1.49844  | 1.16711  | 0.85620  |

|   |          |          |          |
|---|----------|----------|----------|
| C | 1.26995  | -0.17603 | 1.15071  |
| H | 0.44404  | 1.86076  | 2.60684  |
| H | 1.61639  | 3.01963  | 1.96363  |
| H | -2.09880 | 1.74215  | 1.69809  |
| H | -2.69266 | 2.82466  | 0.43068  |
| H | -1.76767 | 2.30161  | -2.05598 |
| H | -1.19219 | -1.67713 | -2.96005 |
| H | -1.69915 | -0.56184 | 1.15786  |
| H | -0.82782 | -3.33888 | -1.28154 |
| H | -2.20607 | -3.22133 | -0.18569 |
| H | 1.75272  | -3.22887 | -0.34624 |
| H | 2.09724  | -3.02506 | 1.37274  |
| H | 2.94542  | -1.49835 | -1.47692 |
| H | 2.50415  | 2.48896  | -0.53538 |
| H | 0.66100  | -0.45415 | 2.00880  |

#### B3LYP-D/TZVP

|   |          |          |          |
|---|----------|----------|----------|
| S | -0.44439 | 3.29125  | 0.85841  |
| S | -0.22106 | -3.11102 | 1.08672  |
| N | -1.29079 | 0.33968  | -2.55804 |
| N | 2.62487  | 0.53118  | -1.16418 |
| C | 0.85543  | 2.25699  | 1.68325  |
| C | -1.87805 | 2.12468  | 0.71143  |
| C | -1.70346 | 1.01207  | -0.28552 |
| C | -1.52191 | 1.27916  | -1.64772 |
| C | -1.20546 | -0.92601 | -2.13726 |
| C | -1.37975 | -1.31724 | -0.81251 |
| C | -1.66056 | -0.31523 | 0.11520  |
| C | -1.24097 | -2.76545 | -0.41763 |
| C | 1.48006  | -2.63307 | 0.53958  |
| C | 1.71580  | -1.16601 | 0.28291  |
| C | 2.39255  | -0.74947 | -0.86041 |
| C | 2.14934  | 1.45785  | -0.33965 |
| C | 1.44359  | 1.16462  | 0.83323  |
| C | 1.26122  | -0.17359 | 1.15004  |
| H | 0.44266  | 1.85208  | 2.60870  |
| H | 1.61277  | 2.99442  | 1.95653  |
| H | -2.10742 | 1.72816  | 1.70184  |
| H | -2.69877 | 2.78522  | 0.42457  |
| H | -1.53945 | 2.30413  | -2.00564 |
| H | -0.97607 | -1.66567 | -2.89959 |
| H | -1.77740 | -0.57327 | 1.16176  |
| H | -0.84539 | -3.35103 | -1.24941 |
| H | -2.21265 | -3.19206 | -0.15654 |
| H | 1.74036  | -3.22034 | -0.34272 |
| H | 2.10892  | -2.98905 | 1.35960  |
| H | 2.75987  | -1.48128 | -1.57457 |
| H | 2.30949  | 2.49152  | -0.63108 |
| H | 0.70660  | -0.45326 | 2.03872  |

#### TPSS-D/TZVP

|   |          |          |         |
|---|----------|----------|---------|
| S | -0.45676 | 3.30409  | 0.87500 |
| S | -0.21570 | -3.10896 | 1.10331 |

|   |          |          |          |
|---|----------|----------|----------|
| N | -1.22689 | 0.33546  | -2.55703 |
| N | 2.60710  | 0.54909  | -1.19487 |
| C | 0.84862  | 2.25845  | 1.69338  |
| C | -1.88722 | 2.12437  | 0.71789  |
| C | -1.68759 | 1.01221  | -0.27982 |
| C | -1.46996 | 1.27892  | -1.64176 |
| C | -1.16697 | -0.93698 | -2.12695 |
| C | -1.37339 | -1.32679 | -0.80146 |
| C | -1.66427 | -0.31986 | 0.12489  |
| C | -1.25601 | -2.77699 | -0.39941 |
| C | 1.48252  | -2.63423 | 0.52230  |
| C | 1.70545  | -1.16239 | 0.26332  |
| C | 2.37813  | -0.73902 | -0.88613 |
| C | 2.12800  | 1.47327  | -0.35591 |
| C | 1.42892  | 1.17255  | 0.82433  |
| C | 1.24804  | -0.17226 | 1.13840  |
| H | 0.43257  | 1.84310  | 2.61638  |
| H | 1.60664  | 2.99859  | 1.96868  |
| H | -2.11939 | 1.72411  | 1.70962  |
| H | -2.70845 | 2.78481  | 0.42131  |
| H | -1.46622 | 2.30687  | -2.00102 |
| H | -0.93007 | -1.68205 | -2.88647 |
| H | -1.80601 | -0.57847 | 1.17257  |
| H | -0.87569 | -3.37924 | -1.23032 |
| H | -2.23013 | -3.18746 | -0.11066 |
| H | 1.72630  | -3.22347 | -0.36708 |
| H | 2.12161  | -2.98995 | 1.33852  |
| H | 2.74676  | -1.47013 | -1.60543 |
| H | 2.28342  | 2.51095  | -0.64749 |
| H | 0.69664  | -0.45858 | 2.03191  |

**Optimised structures of (b)**

**B3LYP/TZVP:UFF**

|   |          |          |          |
|---|----------|----------|----------|
| S | -3.33520 | -0.00020 | -0.60740 |
| S | 2.98870  | -0.00000 | -1.36620 |
| N | -0.22700 | 2.30440  | 1.96090  |
| N | -0.22680 | -2.30380 | 1.96130  |
| C | -2.29970 | -1.46780 | -1.07800 |
| C | -2.29990 | 1.46740  | -1.07810 |
| C | -1.10630 | 1.73630  | -0.20430 |
| C | -1.25030 | 2.12140  | 1.13340  |
| C | 1.00290  | 2.07910  | 1.49100  |
| C | 1.27600  | 1.70550  | 0.17720  |
| C | 0.18680  | 1.57060  | -0.68140 |
| C | 2.69660  | 1.45720  | -0.26610 |
| C | 2.69670  | -1.45730 | -0.26610 |
| C | 1.27610  | -1.70550 | 0.17740  |
| C | 1.00310  | -2.07860 | 1.49140  |
| C | -1.25010 | -2.12110 | 1.13380  |
| C | -1.10610 | -1.73640 | -0.20400 |
| C | 0.18690  | -1.57090 | -0.68120 |
| H | -2.00360 | -1.36430 | -2.12240 |
| H | -3.02030 | -2.28570 | -1.02310 |



|   |          |          |          |
|---|----------|----------|----------|
| H | -2.00380 | 1.36390  | -2.12260 |
| H | -3.02050 | 2.28520  | -1.02320 |
| H | -2.24020 | 2.26960  | 1.55430  |
| H | 1.81330  | 2.19990  | 2.20450  |
| H | 0.35260  | 1.27860  | -1.71200 |
| H | 3.35640  | 1.38270  | 0.59920  |
| H | 3.06410  | 2.28700  | -0.87520 |
| H | 3.35660  | -1.38270 | 0.59910  |
| H | 3.06410  | -2.28710 | -0.87520 |
| H | 1.81350  | -2.19900 | 2.20490  |
| H | -2.24000 | -2.26920 | 1.55480  |
| H | 0.35280  | -1.27930 | -1.71190 |

### B3LYP/TZVP

|    |          |          |         |
|----|----------|----------|---------|
| Fe | 1.53414  | 12.27973 | 5.55433 |
| F  | 4.88844  | 13.42894 | 4.82021 |
| F  | 7.35303  | 13.72637 | 5.80558 |
| F  | 7.73015  | 14.58471 | 8.36754 |
| F  | 5.56622  | 15.14625 | 9.93074 |
| F  | 3.09127  | 14.87111 | 8.97642 |
| F  | 5.00389  | 9.74267  | 4.07516 |
| F  | 7.45342  | 9.41293  | 5.07258 |
| F  | 7.94797  | 9.84536  | 7.72060 |
| F  | 5.91493  | 10.64215 | 9.35598 |
| F  | 3.45663  | 11.01425 | 8.38608 |
| C  | 1.32532  | 13.67941 | 7.08700 |
| H  | 1.29531  | 13.44384 | 8.13664 |
| C  | 0.20649  | 13.74267 | 6.21672 |
| H  | -0.81760 | 13.55028 | 6.49389 |
| C  | 0.67589  | 14.06950 | 4.91329 |
| H  | 0.07060  | 14.17265 | 4.02686 |
| C  | 2.08696  | 14.20538 | 4.97148 |
| H  | 2.73369  | 14.44140 | 4.14365 |
| C  | 2.50377  | 13.97937 | 6.32661 |
| C  | 3.86967  | 14.11969 | 6.85593 |
| C  | 5.01105  | 13.86086 | 6.08751 |
| C  | 6.29922  | 14.01071 | 6.57855 |
| C  | 6.49602  | 14.43994 | 7.88376 |
| C  | 5.39233  | 14.71688 | 8.67761 |
| C  | 4.11260  | 14.56074 | 8.16341 |
| C  | 1.52153  | 10.34636 | 6.34333 |
| H  | 1.42877  | 10.10077 | 7.38734 |
| C  | 0.44987  | 10.50177 | 5.42677 |
| H  | -0.59801 | 10.40714 | 5.66385 |
| C  | 0.99675  | 10.83163 | 4.15524 |
| H  | 0.43719  | 11.03819 | 3.25685 |
| C  | 2.40928  | 10.87945 | 4.27909 |
| H  | 3.10345  | 11.11483 | 3.49117 |
| C  | 2.75244  | 10.56461 | 5.63619 |
| C  | 4.10980  | 10.40311 | 6.18091 |
| C  | 5.18456  | 9.99261  | 5.38108 |
| C  | 6.46625  | 9.80850  | 5.88104 |
| C  | 6.72138  | 10.02193 | 7.22806 |

|   |         |          |         |
|---|---------|----------|---------|
| C | 5.68293 | 10.42149 | 8.05752 |
| C | 4.41242 | 10.60583 | 7.53343 |

**TPSS/TZVP**

|    |          |          |         |
|----|----------|----------|---------|
| Fe | 1.53137  | 12.27875 | 5.54867 |
| F  | 4.79864  | 13.59699 | 4.60889 |
| F  | 7.32125  | 13.89436 | 5.44220 |
| F  | 7.86669  | 14.50923 | 8.05801 |
| F  | 5.79791  | 14.83700 | 9.82225 |
| F  | 3.26251  | 14.57780 | 9.01799 |
| F  | 5.12104  | 9.89987  | 4.19279 |
| F  | 7.51993  | 9.59918  | 5.33779 |
| F  | 7.83501  | 9.94256  | 8.03531 |
| F  | 5.66834  | 10.61567 | 9.57121 |
| F  | 3.25881  | 10.95344 | 8.45600 |
| C  | 1.37049  | 13.56584 | 7.13446 |
| H  | 1.40274  | 13.28459 | 8.17610 |
| C  | 0.19960  | 13.63369 | 6.32004 |
| H  | -0.80631 | 13.39984 | 6.64193 |
| C  | 0.59475  | 14.02016 | 5.00017 |
| H  | -0.05875 | 14.13445 | 4.14563 |
| C  | 2.01178  | 14.19270 | 4.98946 |
| H  | 2.61025  | 14.47703 | 4.13679 |
| C  | 2.50725  | 13.93107 | 6.32130 |
| C  | 3.90002  | 14.06488 | 6.77215 |
| C  | 4.99717  | 13.91660 | 5.90720 |
| C  | 6.31623  | 14.06372 | 6.31876 |
| C  | 6.59822  | 14.36949 | 7.64670 |
| C  | 5.54450  | 14.52863 | 8.53997 |
| C  | 4.23215  | 14.38148 | 8.10031 |
| C  | 1.47098  | 10.36386 | 6.27729 |
| H  | 1.32049  | 10.07933 | 7.30810 |
| C  | 0.44698  | 10.55483 | 5.30089 |
| H  | -0.61582 | 10.45430 | 5.47619 |
| C  | 1.06714  | 10.93578 | 4.06880 |
| H  | 0.55673  | 11.18016 | 3.14694 |
| C  | 2.47911  | 10.98187 | 4.27557 |
| H  | 3.21998  | 11.25371 | 3.53898 |
| C  | 2.74666  | 10.60774 | 5.64463 |
| C  | 4.06926  | 10.45227 | 6.26637 |
| C  | 5.21030  | 10.10597 | 5.52358 |
| C  | 6.46645  | 9.93729  | 6.09879 |
| C  | 6.63044  | 10.10408 | 7.46937 |
| C  | 5.52576  | 10.43912 | 8.24636 |
| C  | 4.28396  | 10.60666 | 7.64602 |

**B3LYP-D/TZVP**

|    |         |          |         |
|----|---------|----------|---------|
| Fe | 1.50713 | 12.28196 | 5.54075 |
| F  | 4.74444 | 13.38937 | 4.63014 |
| F  | 7.27331 | 13.41507 | 5.49149 |
| F  | 7.84757 | 14.00507 | 8.09059 |
| F  | 5.81822 | 14.56587 | 9.82532 |
| F  | 3.27857 | 14.55328 | 8.99642 |

|   |          |          |         |
|---|----------|----------|---------|
| F | 5.13380  | 9.95554  | 4.21938 |
| F | 7.55358  | 9.88451  | 5.34985 |
| F | 7.86223  | 10.42201 | 8.00460 |
| F | 5.68005  | 11.05540 | 9.51381 |
| F | 3.24675  | 11.14622 | 8.41303 |
| C | 1.35196  | 13.61552 | 7.12005 |
| H | 1.37387  | 13.33287 | 8.15765 |
| C | 0.19759  | 13.70804 | 6.30044 |
| H | -0.81326 | 13.50086 | 6.61228 |
| C | 0.61094  | 14.07865 | 4.98939 |
| H | -0.03065 | 14.20625 | 4.13258 |
| C | 2.02313  | 14.21406 | 4.99158 |
| H | 2.63737  | 14.46688 | 4.14497 |
| C | 2.49741  | 13.93595 | 6.31779 |
| C | 3.89311  | 13.97968 | 6.77156 |
| C | 4.96840  | 13.71137 | 5.91621 |
| C | 6.28676  | 13.71687 | 6.34291 |
| C | 6.58303  | 14.00634 | 7.66832 |
| C | 5.54693  | 14.28304 | 8.54911 |
| C | 4.23350  | 14.26948 | 8.09822 |
| C | 1.49248  | 10.34671 | 6.28828 |
| H | 1.36138  | 10.09045 | 7.32518 |
| C | 0.46148  | 10.49440 | 5.32497 |
| H | -0.59380 | 10.37532 | 5.51127 |
| C | 1.05898  | 10.86266 | 4.08663 |
| H | 0.53574  | 11.07944 | 3.16927 |
| C | 2.46257  | 10.94194 | 4.27640 |
| H | 3.19006  | 11.22018 | 3.53439 |
| C | 2.74768  | 10.61465 | 5.64398 |
| C | 4.07569  | 10.54761 | 6.26552 |
| C | 5.22391  | 10.23551 | 5.52835 |
| C | 6.49000  | 10.19026 | 6.09640 |
| C | 6.65035  | 10.45529 | 7.44895 |
| C | 5.53556  | 10.76678 | 8.21578 |
| C | 4.28218  | 10.80463 | 7.62617 |

#### TPSS-D/TZVP

|    |          |          |         |
|----|----------|----------|---------|
| Fe | 1.51120  | 12.28137 | 5.54079 |
| F  | 4.75629  | 13.43110 | 4.59613 |
| F  | 7.29476  | 13.50117 | 5.44523 |
| F  | 7.87540  | 14.05090 | 8.06358 |
| F  | 5.83418  | 14.54143 | 9.82390 |
| F  | 3.28528  | 14.49314 | 9.00547 |
| F  | 5.14043  | 9.98779  | 4.22338 |
| F  | 7.56047  | 9.87476  | 5.36893 |
| F  | 7.86187  | 10.36777 | 8.04473 |
| F  | 5.66782  | 11.00222 | 9.55599 |
| F  | 3.23606  | 11.13962 | 8.43884 |
| C  | 1.35109  | 13.57102 | 7.11585 |
| H  | 1.37595  | 13.28791 | 8.15706 |
| C  | 0.18880  | 13.65265 | 6.29010 |
| H  | -0.82325 | 13.43426 | 6.60316 |
| C  | 0.60148  | 14.02565 | 4.97119 |

|   |          |          |         |
|---|----------|----------|---------|
| H | -0.04262 | 14.14439 | 4.11024 |
| C | 2.02119  | 14.17630 | 4.97216 |
| H | 2.63392  | 14.43830 | 4.12260 |
| C | 2.50019  | 13.90917 | 6.30880 |
| C | 3.89543  | 13.96322 | 6.75891 |
| C | 4.97823  | 13.73099 | 5.89537 |
| C | 6.30197  | 13.75810 | 6.31471 |
| C | 6.60166  | 14.02888 | 7.64659 |
| C | 5.56135  | 14.26914 | 8.53806 |
| C | 4.24361  | 14.23679 | 8.09130 |
| C | 1.47973  | 10.38598 | 6.30187 |
| H | 1.34569  | 10.12320 | 7.34062 |
| C | 0.44446  | 10.54525 | 5.33229 |
| H | -0.61511 | 10.43494 | 5.52037 |
| C | 1.04755  | 10.91661 | 4.08828 |
| H | 0.52408  | 11.14039 | 3.16853 |
| C | 2.46098  | 10.98719 | 4.27940 |
| H | 3.19313  | 11.26558 | 3.53676 |
| C | 2.74478  | 10.64412 | 5.65294 |
| C | 4.07030  | 10.56746 | 6.27689 |
| C | 5.22559  | 10.25535 | 5.54301 |
| C | 6.49134  | 10.18751 | 6.11771 |
| C | 6.64827  | 10.42971 | 7.47831 |
| C | 5.52892  | 10.74109 | 8.24466 |
| C | 4.27752  | 10.80358 | 7.64529 |

### Optimised structures of (c)

#### B3LYP/TZVP:UFF

|   |         |          |          |
|---|---------|----------|----------|
| C | 0.75070 | 1.68160  | -2.32300 |
| C | 1.93890 | 2.02340  | -2.94980 |
| C | 2.18600 | 3.25070  | -3.79560 |
| H | 3.26120 | 3.51890  | -3.80010 |
| H | 1.66600 | 4.13080  | -3.36890 |
| C | 1.70840 | 3.02450  | -5.22500 |
| H | 1.90270 | 3.93440  | -5.83070 |
| H | 0.61750 | 2.81450  | -5.23770 |
| H | 2.25140 | 2.16960  | -5.68140 |
| C | 2.81290 | 0.95860  | -2.75050 |
| C | 2.13150 | 0.01520  | -1.95790 |
| C | 2.64160 | -1.21180 | -1.42980 |
| C | 4.09850 | -1.45110 | -1.45700 |
| C | 4.69890 | -2.19060 | -2.50820 |
| H | 4.07980 | -2.62750 | -3.28180 |
| C | 6.11290 | -2.30780 | -2.60160 |
| H | 6.55140 | -2.83920 | -3.43590 |
| C | 6.95260 | -1.71620 | -1.63330 |
| H | 8.03090 | -1.76730 | -1.70130 |
| C | 6.31800 | -1.08770 | -0.57330 |
| C | 4.96500 | -0.96920 | -0.47640 |
| C | 1.79730 | -2.26750 | -0.97880 |
| C | 2.15910 | -3.36820 | -0.18270 |
| C | 3.47080 | -3.62720 | 0.50920  |
| H | 3.75080 | -2.75370 | 1.12580  |

|   |          |          |          |
|---|----------|----------|----------|
| H | 4.26170  | -3.84060 | -0.23710 |
| H | 3.41720  | -4.49850 | 1.18930  |
| C | 1.04620  | -4.19820 | -0.11500 |
| C | 0.95110  | -5.51120 | 0.62530  |
| H | -0.10510 | -5.80470 | 0.78260  |
| H | 1.39210  | -5.40920 | 1.63830  |
| C | 1.65640  | -6.62200 | -0.14520 |
| H | 1.57270  | -7.57530 | 0.41760  |
| H | 2.73230  | -6.38460 | -0.28170 |
| H | 1.18350  | -6.75440 | -1.14190 |
| C | 0.05070  | -3.58800 | -0.86440 |
| C | 0.63390  | 3.66070  | 0.74390  |
| C | 1.81580  | 4.19090  | 0.03020  |
| C | 1.81450  | 5.54380  | -0.68840 |
| H | 2.55380  | 5.52770  | -1.50680 |
| H | 0.82220  | 5.71520  | -1.14120 |
| C | 2.15520  | 6.73070  | 0.27020  |
| H | 2.13520  | 7.68200  | -0.28380 |
| H | 3.15790  | 6.60020  | 0.70440  |
| H | 1.42690  | 6.79000  | 1.09300  |
| C | 2.84650  | 3.28590  | 0.10430  |
| C | 4.19210  | 3.46560  | -0.60510 |
| H | 4.61750  | 2.50320  | -0.92500 |
| H | 4.93050  | 3.97160  | 0.04070  |
| H | 4.05980  | 4.09240  | -1.49900 |
| C | 2.41050  | 2.11400  | 0.93430  |
| C | 3.10020  | 1.03290  | 1.44790  |
| C | 4.57790  | 0.94430  | 1.29270  |
| C | 5.44110  | 1.93180  | 1.82080  |
| H | 5.02980  | 2.79270  | 2.33280  |
| C | 6.83820  | 1.85770  | 1.60320  |
| H | 7.47250  | 2.67700  | 1.91510  |
| C | 7.39920  | 0.76320  | 0.91780  |
| H | 8.43730  | 0.75990  | 0.61330  |
| C | 6.56050  | -0.30750 | 0.63170  |
| C | 5.17870  | -0.19240 | 0.75060  |
| C | 2.45030  | -0.07880 | 2.18950  |
| C | 2.96550  | -1.00700 | 3.13240  |
| C | 4.32940  | -0.97490 | 3.82720  |
| H | 4.69470  | 0.05590  | 3.95230  |
| H | 5.09310  | -1.54160 | 3.26530  |
| H | 4.25410  | -1.42760 | 4.82750  |
| C | 1.97430  | -2.01790 | 3.36300  |
| C | 2.11030  | -3.23030 | 4.28790  |
| H | 3.17090  | -3.53030 | 4.34490  |
| H | 1.55380  | -4.08270 | 3.85980  |
| C | 1.57830  | -2.96330 | 5.73400  |
| H | 1.70070  | -3.86120 | 6.35980  |
| H | 0.51040  | -2.69850 | 5.70840  |
| H | 2.12810  | -2.13370 | 6.20390  |
| C | 0.82940  | -1.69970 | 2.60470  |
| C | -0.41180 | -2.45630 | 2.43300  |
| H | -0.35120 | -3.52400 | 2.67420  |

|   |          |          |          |
|---|----------|----------|----------|
| C | -1.62400 | -1.96280 | 2.03180  |
| C | -2.89370 | -2.69160 | 1.78780  |
| C | -3.02110 | -4.21340 | 1.79790  |
| H | -2.05070 | -4.68870 | 1.59840  |
| H | -3.73950 | -4.54970 | 1.03330  |
| H | -3.37880 | -4.57300 | 2.77870  |
| C | -3.90080 | -1.78160 | 1.57650  |
| C | -5.37080 | -2.07980 | 1.27050  |
| H | -5.76930 | -1.29120 | 0.60920  |
| H | -5.43740 | -3.03720 | 0.72530  |
| C | -6.25690 | -2.16510 | 2.55500  |
| H | -7.30180 | -2.37650 | 2.27950  |
| H | -6.22720 | -1.21650 | 3.11180  |
| H | -5.90120 | -2.96790 | 3.21830  |
| C | -3.35000 | -0.41080 | 1.69950  |
| C | -4.02600 | 0.77940  | 1.76880  |
| H | -5.12070 | 0.74570  | 1.77870  |
| C | -3.41770 | 2.10480  | 1.83550  |
| C | -3.97730 | 3.36380  | 2.15120  |
| C | -5.38270 | 3.60490  | 2.70930  |
| H | -6.03410 | 2.74940  | 2.46100  |
| H | -5.82080 | 4.50110  | 2.23390  |
| C | -5.39200 | 3.80360  | 4.26030  |
| H | -6.41890 | 3.97940  | 4.61730  |
| H | -4.77170 | 4.66680  | 4.54430  |
| H | -4.99470 | 2.91060  | 4.76610  |
| C | -2.98210 | 4.36880  | 1.90630  |
| C | -3.15320 | 5.87320  | 2.10030  |
| H | -2.46720 | 6.43400  | 1.44670  |
| H | -2.94630 | 6.17580  | 3.14230  |
| H | -4.18410 | 6.18050  | 1.86290  |
| C | -1.80640 | 3.72810  | 1.45520  |
| C | -0.56740 | 4.29480  | 0.93550  |
| H | -0.62500 | 5.34760  | 0.63630  |
| C | 4.16020  | 0.81900  | -3.40930 |
| H | 4.17190  | -0.09290 | -4.03820 |
| H | 4.96430  | 0.78200  | -2.64890 |
| H | 4.38870  | 1.66390  | -4.08480 |
| N | 0.88490  | 0.48590  | -1.70670 |
| H | 0.19550  | 0.07470  | -1.04330 |
| N | 0.51680  | -2.43180 | -1.38850 |
| N | 1.10950  | -0.47830 | 1.94040  |
| N | -1.89450 | -0.54390 | 1.78460  |
| H | -1.46780 | 0.08420  | 2.51540  |
| N | -2.06110 | 2.33150  | 1.47880  |
| N | 0.96720  | 2.29530  | 1.14180  |
| H | 0.64650  | 2.04010  | 2.11120  |
| N | -2.07060 | 0.72450  | -2.17510 |
| H | -1.46210 | -0.03370 | -2.54810 |
| N | -2.45730 | -2.12680 | -1.57210 |
| H | -1.86360 | -1.49590 | -0.99220 |
| C | -1.19460 | -4.16430 | -1.17120 |
| H | -1.30720 | -5.22380 | -1.00400 |

|   |          |          |          |
|---|----------|----------|----------|
| C | -2.30060 | -3.46220 | -1.67220 |
| C | -3.44130 | -4.02510 | -2.24020 |
| C | -3.72450 | -5.47490 | -2.51580 |
| H | -2.88500 | -6.13380 | -2.22450 |
| H | -3.90440 | -5.61660 | -3.60160 |
| H | -4.62930 | -5.78660 | -1.95350 |
| C | -4.30010 | -2.97130 | -2.52490 |
| C | -5.65760 | -3.07500 | -3.17140 |
| H | -5.79230 | -2.24930 | -3.90200 |
| H | -5.74230 | -4.02640 | -3.73680 |
| C | -6.76600 | -3.02910 | -2.12520 |
| H | -7.75220 | -3.12670 | -2.62550 |
| H | -6.74570 | -2.06680 | -1.57330 |
| H | -6.64890 | -3.86710 | -1.40550 |
| C | -3.64870 | -1.81120 | -2.12420 |
| C | -4.16990 | -0.51120 | -2.22510 |
| H | -5.22320 | -0.40820 | -2.44290 |
| C | -3.41580 | 0.66420  | -2.08370 |
| C | -3.93630 | 1.95020  | -1.98440 |
| C | -5.38800 | 2.35140  | -2.08280 |
| H | -5.85520 | 1.84090  | -2.95150 |
| H | -5.47810 | 3.44320  | -2.26220 |
| C | -6.15400 | 2.00960  | -0.81280 |
| H | -7.22430 | 2.27430  | -0.94190 |
| H | -5.74820 | 2.59600  | 0.03330  |
| H | -6.08320 | 0.92670  | -0.58400 |
| C | -2.84680 | 2.81210  | -1.95390 |
| C | -2.92340 | 4.31030  | -1.87010 |
| H | -1.92900 | 4.77140  | -1.71370 |
| H | -3.56610 | 4.59870  | -1.01250 |
| H | -3.36440 | 4.71300  | -2.80530 |
| C | -1.70790 | 2.01840  | -2.07470 |
| C | -0.40410 | 2.48580  | -2.29610 |
| H | -0.29370 | 3.52820  | -2.54790 |
| H | 0.05630  | -1.89440 | -2.15430 |
| H | 0.52390  | -0.08720 | 1.17200  |
| H | -1.50080 | 1.64030  | 0.92870  |

**B3LYP/TZVP**

|   |          |          |         |
|---|----------|----------|---------|
| C | 18.41998 | 6.31633  | 5.93668 |
| C | 19.47164 | 6.26007  | 4.93736 |
| C | 20.49874 | 5.16554  | 4.87519 |
| H | 20.88273 | 5.09111  | 3.85610 |
| H | 20.01699 | 4.20519  | 5.07801 |
| C | 21.67359 | 5.35893  | 5.84992 |
| H | 22.37789 | 4.52658  | 5.77575 |
| H | 21.32480 | 5.41777  | 6.88206 |
| H | 22.21635 | 6.28089  | 5.63043 |
| C | 19.44474 | 7.40177  | 4.19112 |
| C | 18.30491 | 8.21344  | 4.61519 |
| C | 17.82657 | 9.40188  | 4.12886 |
| C | 18.38403 | 10.02413 | 2.89749 |
| C | 18.99350 | 11.31266 | 3.02596 |

|   |          |          |          |
|---|----------|----------|----------|
| H | 19.02805 | 11.75082 | 4.01585  |
| C | 19.53769 | 12.01029 | 1.96870  |
| H | 19.99757 | 12.97426 | 2.15280  |
| C | 19.50541 | 11.49169 | 0.65109  |
| H | 19.92316 | 12.04329 | -0.18183 |
| C | 18.91166 | 10.27017 | 0.51942  |
| C | 18.36136 | 9.53077  | 1.60708  |
| C | 16.84156 | 10.22733 | 4.83701  |
| C | 15.95927 | 11.19722 | 4.35941  |
| C | 15.64062 | 11.52180 | 2.93103  |
| H | 15.75384 | 10.65204 | 2.28797  |
| H | 16.28506 | 12.31083 | 2.53044  |
| H | 14.60903 | 11.86851 | 2.83873  |
| C | 15.35247 | 11.82253 | 5.48323  |
| C | 14.33242 | 12.92398 | 5.43482  |
| H | 13.73399 | 12.91607 | 6.34913  |
| H | 13.62633 | 12.73188 | 4.62069  |
| C | 14.93971 | 14.32369 | 5.24148  |
| H | 14.15926 | 15.08848 | 5.20604  |
| H | 15.50967 | 14.38034 | 4.31183  |
| H | 15.62024 | 14.57018 | 6.05989  |
| C | 15.84602 | 11.20961 | 6.63544  |
| C | 17.23262 | 2.74729  | 2.13965  |
| C | 18.44666 | 3.00485  | 1.38742  |
| C | 19.45583 | 1.94606  | 1.05577  |
| H | 20.45088 | 2.39323  | 0.99396  |
| H | 19.49979 | 1.21916  | 1.87065  |
| C | 19.15906 | 1.21232  | -0.26388 |
| H | 19.90791 | 0.43937  | -0.45304 |
| H | 19.16764 | 1.90629  | -1.10656 |
| H | 18.17781 | 0.73391  | -0.23950 |
| C | 18.50366 | 4.33256  | 1.07121  |
| C | 19.66492 | 5.00196  | 0.40192  |
| H | 19.81521 | 6.01248  | 0.77621  |
| H | 19.52998 | 5.08506  | -0.67873 |
| H | 20.58203 | 4.43670  | 0.57592  |
| C | 17.29009 | 4.98464  | 1.57188  |
| C | 16.82656 | 6.26914  | 1.41989  |
| C | 17.43336 | 7.16747  | 0.40518  |
| C | 17.43962 | 6.75754  | -0.96390 |
| H | 16.99230 | 5.79906  | -1.19857 |
| C | 17.96402 | 7.51983  | -1.98906 |
| H | 17.92406 | 7.14034  | -3.00347 |
| C | 18.54227 | 8.78520  | -1.74004 |
| H | 18.96330 | 9.37969  | -2.54116 |
| C | 18.52332 | 9.19187  | -0.43457 |
| C | 17.96962 | 8.42470  | 0.62803  |
| C | 15.66713 | 6.79063  | 2.14317  |
| C | 14.70320 | 7.72712  | 1.77002  |
| C | 14.50120 | 8.35999  | 0.42406  |
| H | 14.88840 | 7.73982  | -0.38193 |
| H | 14.99531 | 9.33392  | 0.34421  |
| H | 13.43885 | 8.52374  | 0.23212  |



|   |          |          |         |
|---|----------|----------|---------|
| C | 13.87009 | 7.96630  | 2.90144 |
| C | 12.66492 | 8.86130  | 2.94914 |
| H | 12.81155 | 9.70330  | 2.26770 |
| H | 12.57351 | 9.29868  | 3.94767 |
| C | 11.34912 | 8.14836  | 2.59602 |
| H | 10.50373 | 8.84084  | 2.63497 |
| H | 11.15182 | 7.33165  | 3.29380 |
| H | 11.38878 | 7.72126  | 1.59121 |
| C | 14.31503 | 7.15716  | 3.93768 |
| C | 13.80162 | 7.04538  | 5.28840 |
| H | 13.39617 | 7.95096  | 5.72196 |
| C | 13.67192 | 5.90250  | 6.00846 |
| C | 13.09204 | 5.73089  | 7.33490 |
| C | 12.66539 | 6.87624  | 8.19247 |
| H | 13.49693 | 7.55704  | 8.39195 |
| H | 12.27436 | 6.53376  | 9.15001 |
| H | 11.88096 | 7.46231  | 7.70371 |
| C | 13.00075 | 4.39742  | 7.60081 |
| C | 12.42665 | 3.74329  | 8.82256 |
| H | 12.97271 | 2.81824  | 9.02648 |
| H | 12.59165 | 4.38557  | 9.69055 |
| C | 10.92488 | 3.43212  | 8.70228 |
| H | 10.55977 | 2.93180  | 9.60255 |
| H | 10.72288 | 2.78344  | 7.84774 |
| H | 10.34553 | 4.34790  | 8.56610 |
| C | 13.54166 | 3.65757  | 6.46743 |
| C | 13.60792 | 2.31214  | 6.28547 |
| H | 13.13519 | 1.68967  | 7.03324 |
| C | 14.24821 | 1.61617  | 5.20553 |
| C | 14.14817 | 0.27729  | 4.82994 |
| C | 13.20531 | -0.73436 | 5.41127 |
| H | 13.03630 | -0.51800 | 6.47022 |
| H | 13.67282 | -1.72330 | 5.37944 |
| C | 11.84595 | -0.80102 | 4.69529 |
| H | 11.20063 | -1.55819 | 5.14872 |
| H | 11.96928 | -1.05173 | 3.63950 |
| H | 11.33133 | 0.16082  | 4.74889 |
| C | 15.06186 | 0.05762  | 3.76165 |
| C | 15.27286 | -1.23596 | 3.03754 |
| H | 16.14304 | -1.19273 | 2.38137 |
| H | 14.41367 | -1.50036 | 2.41232 |
| H | 15.42698 | -2.06447 | 3.73467 |
| C | 15.70870 | 1.26432  | 3.49859 |
| C | 16.79585 | 1.54357  | 2.60577 |
| H | 17.35301 | 0.67784  | 2.27450 |
| C | 20.50340 | 7.80887  | 3.21376 |
| H | 20.83048 | 8.83404  | 3.39416 |
| H | 20.15810 | 7.76869  | 2.18026 |
| H | 21.37321 | 7.15800  | 3.29962 |
| N | 17.76453 | 7.55596  | 5.75695 |
| H | 16.75781 | 7.59015  | 5.86024 |
| N | 16.72963 | 10.23286 | 6.21893 |
| N | 15.37685 | 6.41608  | 3.44942 |

|                  |          |          |          |
|------------------|----------|----------|----------|
| N                | 14.02372 | 4.61885  | 5.55919  |
| H                | 13.95412 | 4.42873  | 4.56940  |
| N                | 15.16339 | 2.21574  | 4.34936  |
| N                | 16.61510 | 3.99593  | 2.32256  |
| H                | 15.60765 | 4.04281  | 2.37415  |
| N                | 16.93265 | 6.64534  | 8.66939  |
| H                | 16.55557 | 7.37519  | 8.08958  |
| N                | 15.96457 | 9.33650  | 9.13734  |
| H                | 16.92748 | 9.21857  | 8.85545  |
| C                | 15.43569 | 11.46459 | 7.99287  |
| H                | 14.95105 | 12.42149 | 8.13476  |
| C                | 15.44755 | 10.65661 | 9.08194  |
| C                | 14.79575 | 10.90591 | 10.36092 |
| C                | 14.07192 | 12.17525 | 10.67364 |
| H                | 14.71903 | 13.04595 | 10.53472 |
| H                | 13.71032 | 12.18900 | 11.70143 |
| H                | 13.20717 | 12.31077 | 10.01609 |
| C                | 14.90157 | 9.79052  | 11.13816 |
| C                | 14.30084 | 9.55953  | 12.49350 |
| H                | 14.98351 | 8.95096  | 13.09325 |
| H                | 14.21310 | 10.51430 | 13.01723 |
| C                | 12.92141 | 8.88015  | 12.45241 |
| H                | 12.53926 | 8.71845  | 13.46330 |
| H                | 12.97386 | 7.91190  | 11.95171 |
| H                | 12.19949 | 9.49533  | 11.91153 |
| C                | 15.64650 | 8.77925  | 10.40485 |
| C                | 15.94244 | 7.50718  | 10.78074 |
| H                | 15.66372 | 7.21711  | 11.78468 |
| C                | 16.59050 | 6.49317  | 10.00147 |
| C                | 17.02775 | 5.22498  | 10.39521 |
| C                | 16.89384 | 4.63101  | 11.76800 |
| H                | 16.94054 | 5.42460  | 12.51885 |
| H                | 17.75401 | 3.98506  | 11.96757 |
| C                | 15.60357 | 3.82026  | 11.97649 |
| H                | 15.55910 | 3.40647  | 12.98774 |
| H                | 15.54136 | 2.99109  | 11.26893 |
| H                | 14.72067 | 4.44573  | 11.82734 |
| C                | 17.62668 | 4.60764  | 9.26895  |
| C                | 18.29067 | 3.26478  | 9.25882  |
| H                | 18.44380 | 2.89440  | 8.24480  |
| H                | 17.68748 | 2.51936  | 9.78223  |
| H                | 19.26946 | 3.28819  | 9.75124  |
| C                | 17.56493 | 5.51058  | 8.19937  |
| C                | 18.23894 | 5.41134  | 6.94052  |
| H                | 18.81399 | 4.50261  | 6.83043  |
| H                | 17.37521 | 9.73319  | 6.80534  |
| H                | 16.02961 | 5.91536  | 4.03214  |
| H                | 15.66549 | 3.05201  | 4.60793  |
| <b>TPSS/TZVP</b> |          |          |          |
| C                | 18.56260 | 6.52028  | 5.84248  |
| C                | 19.61708 | 6.51230  | 4.85476  |
| C                | 20.73189 | 5.50242  | 4.83998  |

|   |          |          |          |
|---|----------|----------|----------|
| H | 21.15396 | 5.44631  | 3.83142  |
| H | 20.32258 | 4.50673  | 5.05247  |
| C | 21.85855 | 5.81569  | 5.84885  |
| H | 22.63211 | 5.03992  | 5.81477  |
| H | 21.46737 | 5.86784  | 6.86965  |
| H | 22.32890 | 6.77781  | 5.61980  |
| C | 19.51379 | 7.63758  | 4.07020  |
| C | 18.32991 | 8.38179  | 4.47462  |
| C | 17.81328 | 9.56509  | 3.97346  |
| C | 18.32514 | 10.09449 | 2.68648  |
| C | 18.93311 | 11.39347 | 2.67657  |
| H | 18.97919 | 11.92779 | 3.62228  |
| C | 19.47157 | 11.97992 | 1.54364  |
| H | 19.93675 | 12.95939 | 1.62522  |
| C | 19.44049 | 11.32299 | 0.28392  |
| H | 19.86153 | 11.78605 | -0.60413 |
| C | 18.84929 | 10.08562 | 0.28109  |
| C | 18.29554 | 9.46258  | 1.44491  |
| C | 16.86929 | 10.42360 | 4.68670  |
| C | 16.08970 | 11.51243 | 4.24510  |
| C | 15.86932 | 12.00377 | 2.84222  |
| H | 16.05295 | 11.22423 | 2.10273  |
| H | 16.52447 | 12.84798 | 2.58996  |
| H | 14.83509 | 12.34931 | 2.72299  |
| C | 15.46875 | 12.09107 | 5.38480  |
| C | 14.55812 | 13.28819 | 5.38209  |
| H | 13.84121 | 13.21579 | 6.20922  |
| H | 13.95841 | 13.28741 | 4.46276  |
| C | 15.30942 | 14.63331 | 5.48193  |
| H | 14.60755 | 15.47594 | 5.46618  |
| H | 16.00592 | 14.75415 | 4.64551  |
| H | 15.88980 | 14.68627 | 6.40947  |
| C | 15.83508 | 11.33906 | 6.51418  |
| C | 17.02955 | 2.57858  | 2.12785  |
| C | 18.30146 | 2.83478  | 1.60747  |
| C | 19.36876 | 1.80453  | 1.35826  |
| H | 20.34668 | 2.21305  | 1.64643  |
| H | 19.19821 | 0.93713  | 2.00736  |
| C | 19.44369 | 1.33213  | -0.10961 |
| H | 20.23728 | 0.58645  | -0.23971 |
| H | 19.65203 | 2.17099  | -0.78194 |
| H | 18.49523 | 0.88192  | -0.42269 |
| C | 18.41489 | 4.23956  | 1.39030  |
| C | 19.66370 | 4.91060  | 0.89619  |
| H | 19.69468 | 5.96392  | 1.17513  |
| H | 19.75144 | 4.86201  | -0.19741 |
| H | 20.55049 | 4.41942  | 1.31560  |
| C | 17.19595 | 4.83404  | 1.75700  |
| C | 16.71306 | 6.20531  | 1.59365  |
| C | 17.34190 | 6.98712  | 0.50540  |
| C | 17.40240 | 6.40691  | -0.80575 |
| H | 16.97742 | 5.41405  | -0.92948 |
| C | 17.94859 | 7.04700  | -1.90528 |

|   |          |          |          |
|---|----------|----------|----------|
| H | 17.93240 | 6.54614  | -2.87032 |
| C | 18.51745 | 8.34492  | -1.80046 |
| H | 18.95295 | 8.84184  | -2.66282 |
| C | 18.47824 | 8.90250  | -0.54826 |
| C | 17.90990 | 8.25784  | 0.59627  |
| C | 15.67006 | 6.74796  | 2.32687  |
| C | 14.85714 | 7.93132  | 2.07815  |
| C | 14.82664 | 8.73787  | 0.81238  |
| H | 14.89837 | 8.08922  | -0.06638 |
| H | 15.65611 | 9.44981  | 0.74849  |
| H | 13.89211 | 9.30296  | 0.74816  |
| C | 13.99926 | 8.10457  | 3.14019  |
| C | 12.93325 | 9.15388  | 3.28851  |
| H | 13.21606 | 10.04112 | 2.71337  |
| H | 12.88533 | 9.47460  | 4.33684  |
| C | 11.53602 | 8.67448  | 2.83839  |
| H | 10.79251 | 9.46656  | 2.98374  |
| H | 11.21987 | 7.79697  | 3.41108  |
| H | 11.54139 | 8.40104  | 1.77778  |
| C | 14.17760 | 7.01478  | 4.07378  |
| C | 13.50377 | 6.82147  | 5.25657  |
| H | 12.92013 | 7.66850  | 5.60515  |
| C | 13.39620 | 5.63582  | 6.04962  |
| C | 12.87784 | 5.46499  | 7.34240  |
| C | 12.50143 | 6.56339  | 8.29214  |
| H | 12.59121 | 7.54728  | 7.82254  |
| H | 13.15548 | 6.56704  | 9.17360  |
| H | 11.47015 | 6.45400  | 8.65053  |
| C | 12.82511 | 4.06994  | 7.61170  |
| C | 12.32965 | 3.42550  | 8.87749  |
| H | 12.84592 | 2.46997  | 9.03172  |
| H | 12.59672 | 4.05798  | 9.73372  |
| C | 10.80423 | 3.18442  | 8.89144  |
| H | 10.49071 | 2.72490  | 9.83650  |
| H | 10.50607 | 2.52146  | 8.07202  |
| H | 10.25669 | 4.12541  | 8.77222  |
| C | 13.30949 | 3.39576  | 6.48029  |
| C | 13.37244 | 1.99157  | 6.21020  |
| H | 12.83580 | 1.35041  | 6.90237  |
| C | 14.01962 | 1.37450  | 5.17122  |
| C | 14.00543 | -0.03072 | 4.80472  |
| C | 13.13154 | -1.05519 | 5.47206  |
| H | 13.10726 | -0.86408 | 6.55265  |
| H | 13.57407 | -2.04995 | 5.34610  |
| C | 11.68585 | -1.06947 | 4.92937  |
| H | 11.08248 | -1.81469 | 5.46017  |
| H | 11.67453 | -1.31553 | 3.86240  |
| H | 11.21212 | -0.09072 | 5.05438  |
| C | 14.86137 | -0.21560 | 3.74576  |
| C | 15.16405 | -1.48752 | 3.01462  |
| H | 16.24026 | -1.70368 | 3.02569  |
| H | 14.85907 | -1.42194 | 1.96240  |
| H | 14.64564 | -2.33883 | 3.46371  |

|   |          |          |          |
|---|----------|----------|----------|
| C | 15.46066 | 1.06197  | 3.40237  |
| C | 16.44736 | 1.31137  | 2.48972  |
| H | 16.88439 | 0.44264  | 2.00637  |
| C | 20.56509 | 8.08962  | 3.09747  |
| H | 20.79226 | 9.15188  | 3.23186  |
| H | 20.25530 | 7.96375  | 2.05484  |
| H | 21.48672 | 7.51963  | 3.24661  |
| N | 17.81821 | 7.71859  | 5.63906  |
| H | 16.80369 | 7.64432  | 5.68414  |
| N | 16.67358 | 10.33252 | 6.06149  |
| N | 15.12343 | 6.14052  | 3.48839  |
| N | 13.71321 | 4.36778  | 5.56387  |
| H | 13.75641 | 4.17491  | 4.56899  |
| N | 14.84197 | 2.03459  | 4.22472  |
| N | 16.38839 | 3.80792  | 2.25689  |
| H | 15.38418 | 3.90410  | 2.34891  |
| N | 17.06062 | 6.78110  | 8.59484  |
| H | 16.68762 | 7.53226  | 8.02845  |
| N | 15.96767 | 9.41104  | 9.02406  |
| H | 16.97172 | 9.41723  | 8.85418  |
| C | 15.33347 | 11.51401 | 7.84793  |
| H | 14.77668 | 12.43750 | 7.98011  |
| C | 15.33879 | 10.69135 | 8.93908  |
| C | 14.58908 | 10.88263 | 10.16798 |
| C | 13.73434 | 12.08461 | 10.43209 |
| H | 14.31246 | 13.01190 | 10.33243 |
| H | 13.31007 | 12.05765 | 11.43937 |
| H | 12.90166 | 12.14405 | 9.71856  |
| C | 14.74438 | 9.77404  | 10.96478 |
| C | 14.07733 | 9.49505  | 12.28328 |
| H | 14.76504 | 8.93130  | 12.92631 |
| H | 13.88469 | 10.44354 | 12.79816 |
| C | 12.75185 | 8.71388  | 12.15221 |
| H | 12.31682 | 8.52543  | 13.14034 |
| H | 12.91183 | 7.75039  | 11.65842 |
| H | 12.02473 | 9.27862  | 11.55938 |
| C | 15.60956 | 8.83066  | 10.28419 |
| C | 15.97228 | 7.57092  | 10.67896 |
| H | 15.66584 | 7.26277  | 11.67390 |
| C | 16.69697 | 6.59703  | 9.92050  |
| C | 17.18330 | 5.33430  | 10.30949 |
| C | 17.03097 | 4.71395  | 11.67105 |
| H | 16.91792 | 5.50270  | 12.42495 |
| H | 17.95318 | 4.17755  | 11.93157 |
| C | 15.84067 | 3.73712  | 11.77867 |
| H | 15.78109 | 3.30374  | 12.78434 |
| H | 15.94004 | 2.91783  | 11.05886 |
| H | 14.89635 | 4.25091  | 11.56911 |
| C | 17.83348 | 4.76021  | 9.18834  |
| C | 18.52296 | 3.42766  | 9.14719  |
| H | 19.39983 | 3.44356  | 8.49001  |
| H | 17.85737 | 2.63352  | 8.78221  |
| H | 18.86569 | 3.13226  | 10.14479 |

|   |          |         |         |
|---|----------|---------|---------|
| C | 17.75090 | 5.67796 | 8.11985 |
| C | 18.43306 | 5.61363 | 6.86718 |
| H | 19.05592 | 4.72993 | 6.75908 |
| H | 17.18395 | 9.67032 | 6.63069 |
| H | 15.74851 | 5.61353 | 4.09143 |
| H | 15.43139 | 2.79040 | 4.56568 |

**B3LYP-D/TZVP**

|   |          |          |          |
|---|----------|----------|----------|
| C | 18.21807 | 5.93412  | 5.41634  |
| C | 19.28562 | 5.96655  | 4.43006  |
| C | 20.28609 | 4.86230  | 4.27037  |
| H | 20.71660 | 4.90581  | 3.26951  |
| H | 19.77332 | 3.89922  | 4.32716  |
| C | 21.40586 | 4.91615  | 5.32231  |
| H | 22.10429 | 4.08591  | 5.19079  |
| H | 20.99445 | 4.86131  | 6.33162  |
| H | 21.96746 | 5.84983  | 5.24256  |
| C | 19.30525 | 7.19067  | 3.83102  |
| C | 18.18718 | 7.98095  | 4.34415  |
| C | 17.73879 | 9.22868  | 4.00344  |
| C | 18.29310 | 9.97666  | 2.84986  |
| C | 18.85031 | 11.27425 | 3.07685  |
| H | 18.84907 | 11.64758 | 4.09362  |
| C | 19.38196 | 12.05708 | 2.07298  |
| H | 19.80038 | 13.02438 | 2.32543  |
| C | 19.39705 | 11.62475 | 0.72140  |
| H | 19.81377 | 12.24481 | -0.06215 |
| C | 18.84830 | 10.39566 | 0.49516  |
| C | 18.29640 | 9.58202  | 1.52919  |
| C | 16.71994 | 9.94478  | 4.76919  |
| C | 15.77038 | 10.86179 | 4.34354  |
| C | 15.49183 | 11.29658 | 2.93743  |
| H | 15.64264 | 10.48348 | 2.23131  |
| H | 16.14511 | 12.12134 | 2.63613  |
| H | 14.46151 | 11.63860 | 2.83539  |
| C | 15.06223 | 11.32004 | 5.49498  |
| C | 13.91584 | 12.28632 | 5.49005  |
| H | 13.35138 | 12.19255 | 6.42125  |
| H | 13.21667 | 12.01821 | 4.69008  |
| C | 14.35259 | 13.74695 | 5.29913  |
| H | 13.49151 | 14.42031 | 5.28791  |
| H | 14.89196 | 13.87091 | 4.35779  |
| H | 15.02054 | 14.05840 | 6.10574  |
| C | 15.59170 | 10.68254 | 6.60833  |
| C | 17.50091 | 3.17941  | 2.65106  |
| C | 18.63566 | 3.35401  | 1.76320  |
| C | 19.71109 | 2.32536  | 1.59524  |
| H | 20.64593 | 2.80837  | 1.30386  |
| H | 19.90773 | 1.84430  | 2.55738  |
| C | 19.34863 | 1.25631  | 0.55117  |
| H | 20.14309 | 0.51168  | 0.46212  |
| H | 19.19531 | 1.71185  | -0.42959 |
| H | 18.42566 | 0.74121  | 0.82433  |

|   |          |          |          |
|---|----------|----------|----------|
| C | 18.55343 | 4.57561  | 1.16406  |
| C | 19.59552 | 5.14395  | 0.25243  |
| H | 19.74716 | 6.20682  | 0.42253  |
| H | 19.32369 | 5.03149  | -0.79917 |
| H | 20.54993 | 4.63804  | 0.40129  |
| C | 17.31862 | 5.23150  | 1.61092  |
| C | 16.77817 | 6.44354  | 1.27166  |
| C | 17.40251 | 7.29332  | 0.22912  |
| C | 17.43328 | 6.91077  | -1.14194 |
| H | 16.99677 | 5.95535  | -1.40777 |
| C | 17.98129 | 7.70635  | -2.13128 |
| H | 17.97007 | 7.35516  | -3.15637 |
| C | 18.54604 | 8.97251  | -1.84025 |
| H | 18.97343 | 9.58783  | -2.62189 |
| C | 18.50340 | 9.34951  | -0.52524 |
| C | 17.93992 | 8.53383  | 0.49362  |
| C | 15.60441 | 7.03391  | 1.90442  |
| C | 14.68920 | 7.95967  | 1.40393  |
| C | 14.55957 | 8.46863  | -0.00033 |
| H | 14.85997 | 7.72332  | -0.73425 |
| H | 15.18039 | 9.35418  | -0.17217 |
| H | 13.52594 | 8.74632  | -0.21459 |
| C | 13.84729 | 8.35885  | 2.47889  |
| C | 12.68413 | 9.30108  | 2.39879  |
| H | 12.87384 | 10.05048 | 1.62639  |
| H | 12.59611 | 9.85673  | 3.33689  |
| C | 11.35462 | 8.58870  | 2.10700  |
| H | 10.52727 | 9.30082  | 2.04568  |
| H | 11.12816 | 7.86575  | 2.89358  |
| H | 11.40597 | 8.04278  | 1.16196  |
| C | 14.23940 | 7.66036  | 3.61131  |
| C | 13.70773 | 7.76598  | 4.94135  |
| H | 13.20543 | 8.69515  | 5.17193  |
| C | 13.70741 | 6.81304  | 5.90345  |
| C | 13.09914 | 6.87148  | 7.22365  |
| C | 12.45605 | 8.10343  | 7.76776  |
| H | 13.05839 | 8.98719  | 7.55397  |
| H | 12.32847 | 8.04306  | 8.84805  |
| H | 11.46926 | 8.25876  | 7.31922  |
| C | 13.17892 | 5.63665  | 7.79359  |
| C | 12.61977 | 5.19931  | 9.10984  |
| H | 13.35453 | 4.57111  | 9.61804  |
| H | 12.47597 | 6.07248  | 9.74556  |
| C | 11.28865 | 4.44142  | 8.97522  |
| H | 10.92087 | 4.12689  | 9.95500  |
| H | 11.40047 | 3.55271  | 8.35187  |
| H | 10.52906 | 5.07538  | 8.51300  |
| C | 13.86947 | 4.74078  | 6.87850  |
| C | 14.12981 | 3.41950  | 7.03250  |
| H | 13.74642 | 2.94575  | 7.92483  |
| C | 14.85778 | 2.56755  | 6.14273  |
| C | 14.94612 | 1.17937  | 6.15561  |
| C | 14.18673 | 0.26356  | 7.06818  |

|   |          |          |          |
|---|----------|----------|----------|
| H | 14.18718 | 0.66846  | 8.08547  |
| H | 14.70392 | -0.69810 | 7.12843  |
| C | 12.73377 | 0.03474  | 6.62120  |
| H | 12.20814 | -0.63572 | 7.30641  |
| H | 12.69988 | -0.40355 | 5.62124  |
| H | 12.19135 | 0.98205  | 6.58439  |
| C | 15.82341 | 0.79101  | 5.10545  |
| C | 16.18658 | -0.61691 | 4.75083  |
| H | 16.78649 | -0.66182 | 3.84136  |
| H | 15.29565 | -1.22931 | 4.58336  |
| H | 16.75830 | -1.09823 | 5.55113  |
| C | 16.26579 | 1.94887  | 4.47295  |
| C | 17.25189 | 2.10121  | 3.44469  |
| H | 17.89758 | 1.24692  | 3.29699  |
| C | 20.38235 | 7.68967  | 2.92078  |
| H | 20.69802 | 8.69414  | 3.20567  |
| H | 20.05519 | 7.74833  | 1.88316  |
| H | 21.25181 | 7.03389  | 2.96124  |
| N | 17.61538 | 7.19302  | 5.36642  |
| H | 16.69132 | 7.39115  | 5.71354  |
| N | 16.57144 | 9.80951  | 6.15257  |
| N | 15.26616 | 6.80545  | 3.23441  |
| N | 14.26464 | 5.52423  | 5.77301  |
| H | 14.25472 | 5.09598  | 4.85751  |
| N | 15.62789 | 3.02753  | 5.07779  |
| N | 16.76469 | 4.36731  | 2.57465  |
| H | 15.77062 | 4.36506  | 2.74358  |
| N | 16.61258 | 5.96018  | 8.09224  |
| H | 15.97188 | 6.49629  | 7.52608  |
| N | 15.60927 | 8.57345  | 8.87524  |
| H | 16.32236 | 8.27324  | 8.23765  |
| C | 15.18537 | 10.82989 | 7.98596  |
| H | 14.73493 | 11.78179 | 8.23285  |
| C | 15.17959 | 9.89568  | 8.97213  |
| C | 14.58990 | 10.02503 | 10.30118 |
| C | 13.95447 | 11.28764 | 10.78177 |
| H | 14.65950 | 12.12297 | 10.74940 |
| H | 13.58873 | 11.19306 | 11.80361 |
| H | 13.10427 | 11.56157 | 10.14860 |
| C | 14.67851 | 8.82535  | 10.93980 |
| C | 14.16984 | 8.47408  | 12.30577 |
| H | 14.90582 | 7.84281  | 12.81237 |
| H | 14.09095 | 9.38317  | 12.90548 |
| C | 12.81066 | 7.75688  | 12.29320 |
| H | 12.46600 | 7.55754  | 13.31058 |
| H | 12.87630 | 6.80422  | 11.76691 |
| H | 12.05593 | 8.36551  | 11.79038 |
| C | 15.33539 | 7.87256  | 10.05342 |
| C | 15.58647 | 6.55452  | 10.27798 |
| H | 15.29970 | 6.16570  | 11.24462 |
| C | 16.22045 | 5.62652  | 9.39468  |
| C | 16.65920 | 4.32987  | 9.64495  |
| C | 16.48783 | 3.55282  | 10.91471 |



|   |          |         |          |
|---|----------|---------|----------|
| H | 16.22438 | 4.22520 | 11.73462 |
| H | 17.44264 | 3.09759 | 11.19874 |
| C | 15.42477 | 2.44742 | 10.79926 |
| H | 15.35506 | 1.86824 | 11.72357 |
| H | 15.66290 | 1.76093 | 9.98434  |
| H | 14.44205 | 2.87489 | 10.59066 |
| C | 17.31121 | 3.85611 | 8.47242  |
| C | 17.94304 | 2.51249 | 8.28763  |
| H | 18.89894 | 2.58228 | 7.76255  |
| H | 17.29574 | 1.85272 | 7.70025  |
| H | 18.13211 | 2.02579 | 9.24574  |
| C | 17.27352 | 4.87252 | 7.52276  |
| C | 17.97407 | 4.90624 | 6.28028  |
| H | 18.52058 | 3.99919 | 6.06317  |
| H | 17.34533 | 9.51302 | 6.72668  |
| H | 15.94999 | 6.45728 | 3.88795  |
| H | 16.10352 | 3.92013 | 5.13783  |

**TPSS-D/TZVP**

|   |          |          |          |
|---|----------|----------|----------|
| C | 18.36592 | 6.21600  | 5.21554  |
| C | 19.49085 | 6.40221  | 4.33880  |
| C | 20.64042 | 5.43920  | 4.27908  |
| H | 21.22847 | 5.62721  | 3.37676  |
| H | 20.25177 | 4.41803  | 4.18390  |
| C | 21.55421 | 5.53596  | 5.51931  |
| H | 22.37124 | 4.80797  | 5.45683  |
| H | 20.98610 | 5.34148  | 6.43466  |
| H | 21.99051 | 6.53748  | 5.60032  |
| C | 19.42015 | 7.66102  | 3.77488  |
| C | 18.19907 | 8.29629  | 4.22804  |
| C | 17.63756 | 9.51729  | 3.86088  |
| C | 18.15171 | 10.18902 | 2.65654  |
| C | 18.59352 | 11.55284 | 2.70529  |
| H | 18.51206 | 12.07222 | 3.65709  |
| C | 19.13105 | 12.21389 | 1.61398  |
| H | 19.46467 | 13.24180 | 1.73414  |
| C | 19.27996 | 11.58060 | 0.34504  |
| H | 19.70632 | 12.11185 | -0.50097 |
| C | 18.85138 | 10.27950 | 0.28579  |
| C | 18.28823 | 9.59258  | 1.40813  |
| C | 16.58388 | 10.18319 | 4.59823  |
| C | 15.67735 | 11.18676 | 4.19480  |
| C | 15.51578 | 11.79426 | 2.83282  |
| H | 15.75094 | 11.07831 | 2.04296  |
| H | 16.17491 | 12.65943 | 2.68768  |
| H | 14.48611 | 12.14020 | 2.69272  |
| C | 14.87818 | 11.52825 | 5.31762  |
| C | 13.78600 | 12.55966 | 5.35103  |
| H | 13.08994 | 12.33264 | 6.16760  |
| H | 13.19777 | 12.50395 | 4.42489  |
| C | 14.32288 | 13.99665 | 5.51588  |
| H | 13.50350 | 14.72518 | 5.53182  |
| H | 14.99511 | 14.25473 | 4.69077  |

|   |          |          |          |
|---|----------|----------|----------|
| H | 14.88860 | 14.09131 | 6.44925  |
| C | 15.28436 | 10.73644 | 6.40215  |
| C | 17.48842 | 2.97429  | 2.91501  |
| C | 18.71295 | 3.15206  | 2.25389  |
| C | 19.82436 | 2.14290  | 2.19143  |
| H | 20.79004 | 2.64970  | 2.32210  |
| H | 19.73313 | 1.44265  | 3.03049  |
| C | 19.84780 | 1.35619  | 0.86464  |
| H | 20.67229 | 0.63346  | 0.84883  |
| H | 19.97101 | 2.03545  | 0.01451  |
| H | 18.90761 | 0.81195  | 0.72332  |
| C | 18.72390 | 4.44973  | 1.68084  |
| C | 19.90199 | 5.03249  | 0.95735  |
| H | 19.97915 | 6.10949  | 1.11642  |
| H | 19.84479 | 4.87236  | -0.12655 |
| H | 20.82799 | 4.56368  | 1.30773  |
| C | 17.48589 | 5.06415  | 1.97557  |
| C | 16.96372 | 6.35717  | 1.58828  |
| C | 17.62620 | 7.06191  | 0.47871  |
| C | 17.80683 | 6.44871  | -0.80406 |
| H | 17.45974 | 5.42559  | -0.92636 |
| C | 18.37417 | 7.10889  | -1.88106 |
| H | 18.45942 | 6.58793  | -2.83166 |
| C | 18.82925 | 8.45752  | -1.78709 |
| H | 19.26886 | 8.96137  | -2.64308 |
| C | 18.66813 | 9.04808  | -0.56008 |
| C | 18.08856 | 8.36917  | 0.55771  |
| C | 15.88508 | 6.99482  | 2.19731  |
| C | 15.09334 | 8.12077  | 1.73964  |
| C | 15.08449 | 8.71802  | 0.36134  |
| H | 15.32462 | 7.96936  | -0.39793 |
| H | 15.81777 | 9.52623  | 0.25685  |
| H | 14.09583 | 9.13255  | 0.13988  |
| C | 14.21810 | 8.47260  | 2.74755  |
| C | 13.10914 | 9.48185  | 2.68819  |
| H | 13.31674 | 10.20931 | 1.89877  |
| H | 13.08663 | 10.04609 | 3.62924  |
| C | 11.73202 | 8.83086  | 2.43958  |
| H | 10.94229 | 9.59064  | 2.42113  |
| H | 11.49794 | 8.10689  | 3.22648  |
| H | 11.72320 | 8.30120  | 1.48079  |
| C | 14.38798 | 7.56913  | 3.85307  |
| C | 13.71962 | 7.63033  | 5.05724  |
| H | 13.16236 | 8.54555  | 5.22867  |
| C | 13.58888 | 6.63800  | 6.06187  |
| C | 12.90157 | 6.69886  | 7.29462  |
| C | 12.24247 | 7.91446  | 7.87763  |
| H | 12.54907 | 8.82861  | 7.36163  |
| H | 12.50206 | 8.03878  | 8.93533  |
| H | 11.14854 | 7.84111  | 7.81368  |
| C | 12.90966 | 5.40337  | 7.85789  |
| C | 12.27476 | 4.99745  | 9.15522  |
| H | 12.87809 | 4.21661  | 9.63320  |

|   |          |          |          |
|---|----------|----------|----------|
| H | 12.28623 | 5.85461  | 9.83805  |
| C | 10.82380 | 4.49892  | 8.99034  |
| H | 10.39132 | 4.22044  | 9.95877  |
| H | 10.78593 | 3.62444  | 8.33155  |
| H | 10.19540 | 5.27777  | 8.54520  |
| C | 13.58759 | 4.54723  | 6.96705  |
| C | 13.77263 | 3.14169  | 7.02811  |
| H | 13.23231 | 2.62653  | 7.81418  |
| C | 14.53129 | 2.36043  | 6.19003  |
| C | 14.61384 | 0.91724  | 6.16925  |
| C | 13.76671 | 0.02237  | 7.02740  |
| H | 13.67570 | 0.45542  | 8.03133  |
| H | 14.26632 | -0.94482 | 7.15463  |
| C | 12.35660 | -0.20085 | 6.44024  |
| H | 11.75749 | -0.84001 | 7.09877  |
| H | 12.42060 | -0.68027 | 5.45776  |
| H | 11.83488 | 0.75349  | 6.31586  |
| C | 15.52023 | 0.54509  | 5.20094  |
| C | 15.91534 | -0.84118 | 4.79478  |
| H | 17.00073 | -0.98297 | 4.87767  |
| H | 15.64191 | -1.03925 | 3.75064  |
| H | 15.42849 | -1.59427 | 5.42002  |
| C | 16.04387 | 1.73861  | 4.57448  |
| C | 17.01517 | 1.81776  | 3.61002  |
| H | 17.51295 | 0.88659  | 3.35593  |
| C | 20.52530 | 8.30014  | 2.98362  |
| H | 20.60498 | 9.36739  | 3.20758  |
| H | 20.36893 | 8.21219  | 1.90251  |
| H | 21.48062 | 7.82264  | 3.22317  |
| N | 17.66268 | 7.44147  | 5.22461  |
| H | 16.66209 | 7.47704  | 5.39808  |
| N | 16.28937 | 9.89575  | 5.93197  |
| N | 15.31002 | 6.58432  | 3.42630  |
| N | 14.03648 | 5.32876  | 5.90757  |
| H | 14.23753 | 4.92628  | 4.99887  |
| N | 15.36708 | 2.84474  | 5.14967  |
| N | 16.77451 | 4.15945  | 2.76487  |
| H | 15.77406 | 4.22165  | 2.91083  |
| N | 16.64608 | 5.98014  | 7.76376  |
| H | 16.86927 | 6.95366  | 7.59035  |
| N | 15.42778 | 8.50318  | 8.53020  |
| H | 15.09918 | 8.03960  | 7.67904  |
| C | 14.82861 | 10.78147 | 7.75729  |
| H | 14.31734 | 11.69554 | 8.04478  |
| C | 14.93359 | 9.81917  | 8.72850  |
| C | 14.55044 | 9.92805  | 10.11722 |
| C | 14.05659 | 11.19869 | 10.73715 |
| H | 14.77986 | 12.01223 | 10.60114 |
| H | 13.87535 | 11.07755 | 11.80850 |
| H | 13.11481 | 11.52146 | 10.27360 |
| C | 14.73617 | 8.70561  | 10.72399 |
| C | 14.46330 | 8.34636  | 12.15676 |
| H | 15.24664 | 7.66847  | 12.51877 |

|   |          |         |          |
|---|----------|---------|----------|
| H | 14.52343 | 9.24740 | 12.77771 |
| C | 13.08299 | 7.68487 | 12.35616 |
| H | 12.91003 | 7.45444 | 13.41345 |
| H | 13.01177 | 6.75295 | 11.78654 |
| H | 12.28361 | 8.34990 | 12.01209 |
| C | 15.23874 | 7.77455 | 9.73832  |
| C | 15.53428 | 6.44417 | 9.91905  |
| H | 15.28530 | 6.02148 | 10.88691 |
| C | 16.16246 | 5.56153 | 8.99989  |
| C | 16.49222 | 4.19578 | 9.13676  |
| C | 16.23724 | 3.33548 | 10.34363 |
| H | 15.87500 | 3.95676 | 11.17098 |
| H | 17.19848 | 2.91903 | 10.67882 |
| C | 15.25526 | 2.17060 | 10.11962 |
| H | 15.20065 | 1.53322 | 11.01005 |
| H | 15.56615 | 1.55391 | 9.27113  |
| H | 14.25146 | 2.54740 | 9.90456  |
| C | 17.20795 | 3.80597 | 7.98063  |
| C | 17.78797 | 2.45102 | 7.70312  |
| H | 18.66784 | 2.51593 | 7.05404  |
| H | 17.06847 | 1.78585 | 7.20918  |
| H | 18.09671 | 1.96477 | 8.63560  |
| C | 17.32790 | 4.93796 | 7.14447  |
| C | 18.12097 | 5.09170 | 5.97937  |
| H | 18.71742 | 4.22446 | 5.71337  |
| H | 16.93611 | 9.41895 | 6.54899  |
| H | 15.93268 | 6.14211 | 4.09701  |
| H | 15.95098 | 3.65511 | 5.37489  |
